# Supplementary material for: Aza-benzannulated-perylenebisimide-porphyrin dyad as an intensely absorbing donor in bulk-heterojunction organic solar cells
Source: Royal Society of Chemistry journal article supplement (doi:10.1039/d3ma00610g), 2023-01-01
Supplement: d3ma00610g1.pdf [file d3ma00610g1.pdf]

## Electronic Supporting Information

### Aza-benzannulated-erylenebisimide-porphyrin dyad as an intensely absorbing donor in bulk-heterojunction organic solar cell

Ayushi Kaushik<sup>a</sup>, Subhrajyoti Bhandary<sup>b</sup>, Ganesh D. Sharma<sup>c</sup>, Jeyaraman Sankar<sup>a\*</sup>

*Department of Chemistry, Indian Institute of Science Education and Research, Bhopal 462 066, Madhya Pradesh, India*

Email for correspondence: [sankar@iiserb.ac.in](mailto:sankar@iiserb.ac.in)\*

- a. Department of Chemistry, Indian Institute of Science Education and Research, Bhopal (MP) 462066, India.
- b. Department of Chemistry, Ghent University, 9000 Ghent, Belgium.
- c. Department of Physics and Electronics and Communication Engineering, The LNM Institute of Information Technology, Jamdoli, Jaipur (Raj), 302031, India (gdsharma273@gmail.com and gdsharma@lnmiit.ac.in).

| <b><u>Table of Contents</u></b>                                | <b><u>Page</u></b> |
|----------------------------------------------------------------|--------------------|
| <b>List of Abbreviations</b>                                   | <b>S4</b>          |
| <b>Symbols used</b>                                            | <b>S4</b>          |
| <b>Materials and Methods and Formulas used</b>                 | <b>S5-S6</b>       |
| <b>Syntheses and Procedures</b>                                |                    |
| Synthetic scheme for PBI precursors                            | <b>S7</b>          |
| Synthetic scheme for Porphyrin precursors                      | <b>S7</b>          |
| Synthetic scheme for <b>PDPP</b> and <b>Zn-PDPP</b>            | <b>S7</b>          |
| Procedures for the synthesis of PBI precursors                 | <b>S8</b>          |
| Procedures for the synthesis of Porphyrin precursors           | <b>S8-S10</b>      |
| Procedures for the synthesis of <b>PDPP</b> and <b>Zn-PDPP</b> | <b>S10</b>         |
| <b>NMR Spectra</b>                                             |                    |
| <sup>1</sup> H NMR spectra of <b>PBI</b>                       | <b>S11</b>         |
| <sup>1</sup> H NMR spectra of <b>PBNT</b>                      | <b>S11</b>         |
| <sup>1</sup> H NMR spectra of <b>PBN</b>                       | <b>S12</b>         |
| <sup>1</sup> H NMR spectra of <b>DPM</b>                       | <b>S12</b>         |
| <sup>1</sup> H NMR spectra of <b>PORP</b>                      | <b>S13</b>         |
| <sup>1</sup> H NMR spectra of <b>PCHO</b>                      | <b>S13</b>         |
| <sup>1</sup> H NMR spectra of <b>PDPP</b>                      | <b>S14</b>         |

|                                                                                                                                                  |            |
|--------------------------------------------------------------------------------------------------------------------------------------------------|------------|
| Partial $^1\text{H}$ NMR spectra of <b>PDPP</b>                                                                                                  | <b>S14</b> |
| $^{13}\text{C}\{^1\text{H}\}$ NMR spectra of <b>PDPP</b>                                                                                         | <b>S15</b> |
| $^1\text{H}$ - $^1\text{H}$ COSY NMR spectra of <b>PDPP</b>                                                                                      | <b>S15</b> |
| $^1\text{H}$ - $^1\text{H}$ NOESY NMR spectra of <b>PDPP</b>                                                                                     | <b>S16</b> |
| $^1\text{H}$ - $^{13}\text{C}$ HSQC NMR spectra of <b>PDPP</b>                                                                                   | <b>S16</b> |
| $^1\text{H}$ - $^{13}\text{C}$ HMBC NMR spectra of <b>PDPP</b>                                                                                   | <b>S17</b> |
| $^1\text{H}$ NMR spectra of <b>PDPP</b> with TFA added                                                                                           | <b>S17</b> |
| $^1\text{H}$ NMR spectra of <b>PDPP</b> with $\text{D}_2\text{O}$ added                                                                          | <b>S18</b> |
| Comparison of partial $^1\text{H}$ -NMR spectra of <b>PDPP</b> with $\text{D}_2\text{O}$ , TFA added and without any addition in $\text{CDCl}_3$ | <b>S18</b> |
| VT- $^1\text{H}$ NMR spectra of <b>PDPP</b> in toluene- $\text{D}_8$                                                                             | <b>S19</b> |
| $^1\text{H}$ NMR spectra of <b>Zn-PDPP</b>                                                                                                       | <b>S20</b> |
| $^{13}\text{C}\{^1\text{H}\}$ NMR spectra of <b>Zn-PDPP</b>                                                                                      | <b>S20</b> |
| $^1\text{H}$ - $^1\text{H}$ COSY NMR spectra of <b>Zn-PDPP</b>                                                                                   | <b>S21</b> |
| $^1\text{H}$ - $^1\text{H}$ NOESY NMR spectra of <b>Zn-PDPP</b>                                                                                  | <b>S21</b> |
| $^1\text{H}$ - $^{13}\text{C}$ HSQC NMR spectra of <b>Zn-PDPP</b>                                                                                | <b>S22</b> |
| $^1\text{H}$ - $^{13}\text{C}$ HMBC NMR spectra of <b>Zn-PDPP</b>                                                                                | <b>S22</b> |
| <b>Mass Spectra</b>                                                                                                                              |            |
| Mass spectra of <b>PBI</b>                                                                                                                       | <b>S23</b> |
| Mass spectra of <b>PBNT</b>                                                                                                                      | <b>S23</b> |
| Mass spectra of <b>PBN</b>                                                                                                                       | <b>S24</b> |
| Mass spectra of <b>DPM</b>                                                                                                                       | <b>S24</b> |
| Mass spectra of <b>PORP</b>                                                                                                                      | <b>S25</b> |
| Mass spectra of <b>Cu-PORP</b>                                                                                                                   | <b>S25</b> |
| Mass spectra of <b>CPHO</b>                                                                                                                      | <b>S26</b> |
| Mass spectra of <b>PCHO</b>                                                                                                                      | <b>S26</b> |
| Mass spectra of <b>PDPP</b>                                                                                                                      | <b>S27</b> |
| Mass spectra of <b>Zn-PDPP</b>                                                                                                                   | <b>S27</b> |
| FT-IR spectra for <b>PDPP</b>                                                                                                                    | <b>S28</b> |
| <b>Photophysical studies</b>                                                                                                                     |            |
| Absorption and Emission spectra of <b>PDPP</b> in different solvents                                                                             | <b>S28</b> |
| Absorption spectra of <b>Zn-PDPP</b> in different solvents                                                                                       | <b>S28</b> |

|                                                                                             |                |
|---------------------------------------------------------------------------------------------|----------------|
| Absorption and Emission spectra of <b>PBI</b> and <b>PORP</b> in toluene                    | <b>S29</b>     |
| <b>Cyclic voltammograms and differential pulse voltammograms (overlaid)</b>                 |                |
| CV and DPV for <b>PDPP</b>                                                                  | <b>S29</b>     |
| CV and DPV for <b>Zn-PDPP</b>                                                               | <b>S29</b>     |
| CV and DPV for <b>PBI</b>                                                                   | <b>S30</b>     |
| CV and DPV for <b>PORP</b>                                                                  | <b>S30</b>     |
| <b>Table S1 for photophysical and electrochemical data for PBI, PORP, PDPP, and Zn-PDPP</b> | <b>S30</b>     |
| <b>Density Functional Theory calculations</b>                                               |                |
| DFT studies for <b>PDPP</b>                                                                 | <b>S31</b>     |
| DFT studies for <b>Zn-PDPP</b>                                                              | <b>S32</b>     |
| <b>Single Crystal X-ray Diffraction Data (Table S2) for PDPP-triflate and PDPP</b>          | <b>S33</b>     |
| <b>Crystallographic studies</b>                                                             |                |
| Crystallographic images for <b>PDPP-triflate</b>                                            | <b>S34</b>     |
| Crystal packing diagram for <b>PDPP-triflate</b>                                            | <b>S34-S35</b> |
| Crystallographic images for <b>PDPP</b>                                                     | <b>S35</b>     |
| Crystal packing diagram for <b>PDPP</b>                                                     | <b>S35-S36</b> |
| Mechanistic details for the formation of <b>PDPP</b> in a single step                       | <b>S37</b>     |
| Photovoltaic parameters for devices optimization                                            | <b>S37-S38</b> |
| Cartesian coordinates of crystal <b>PDPP-triflate</b>                                       | <b>S38-S42</b> |
| Cartesian coordinates of crystal <b>PDPP</b>                                                | <b>S42-S51</b> |
| Bond distance data of compound <b>PDPP-triflate</b>                                         | <b>S51-S56</b> |
| Bond distance data of compound <b>PDPP</b>                                                  | <b>S56-S64</b> |
| Cartesian coordinates of DFT-optimized structure of <b>PDPP</b>                             | <b>S64-S68</b> |
| Cartesian coordinates of DFT-optimized structure of <b>Zn-PDPP</b>                          | <b>S68-S72</b> |
| <b>References</b>                                                                           | <b>S72</b>     |

**Abbreviations used-**

|                          |                                                                                                       |
|--------------------------|-------------------------------------------------------------------------------------------------------|
| <b>Al</b>                | <b>Aluminium</b>                                                                                      |
| <b>APCI</b>              | <b>Atmospheric pressure chemical ionization</b>                                                       |
| <b>CHL</b>               | <b>Chloroform</b>                                                                                     |
| <b>COSY</b>              | <b>Correlation spectroscopy (homonuclear)</b>                                                         |
| <b>CV</b>                | <b>Cyclic voltammetry</b>                                                                             |
| <b>d (NMR)</b>           | <b>Doublet</b>                                                                                        |
| <b>DCM</b>               | <b>Dichloromethane</b>                                                                                |
| <b>DFT</b>               | <b>Density functional theory</b>                                                                      |
| <b>DMF</b>               | <b>Dimethylformamide</b>                                                                              |
| <b>DPV</b>               | <b>Differential pulse voltammetry</b>                                                                 |
| <b>Equiv.</b>            | <b>Equivalents</b>                                                                                    |
| <b>ESI</b>               | <b>Electron spray ionization</b>                                                                      |
| <b>HMBC</b>              | <b>Heteronuclear multiple-bond correlation spectroscopy</b>                                           |
| <b>HOMO</b>              | <b>Highest occupied molecular orbital</b>                                                             |
| <b>HRMS</b>              | <b>High resolution mass spectrometry</b>                                                              |
| <b>HSQC</b>              | <b>Heteronuclear single-quantum correlation spectroscopy</b>                                          |
| <b>IR</b>                | <b>Infrared spectroscopy</b>                                                                          |
| <b>ITO</b>               | <b>Indium-doped tin oxide</b>                                                                         |
| <b>LUMO</b>              | <b>Lowest unoccupied molecular orbital</b>                                                            |
| <b>m (NMR)</b>           | <b>Multiplet</b>                                                                                      |
| <b>m/z</b>               | <b>Mass to charge ratio</b>                                                                           |
| <b>NMR</b>               | <b>Nuclear magnetic resonance</b>                                                                     |
| <b>NOESY</b>             | <b>Nuclear Overhauser Effect Spectroscopy</b>                                                         |
| <b>PBI</b>               | <b>Perylenebisimide</b>                                                                               |
| <b>PC<sub>71</sub>BM</b> | <b>[6,6]-phenyl-C<sub>71</sub>-butyric acid methyl ester.</b>                                         |
| <b>PDI</b>               | <b>Perylenediimide</b>                                                                                |
| <b>PEDOT</b>             | <b>Poly(3,4-ethylenedioxythiophene)</b>                                                               |
| <b>PFN</b>               | <b>Poly[(9, 9-bis (3'-(N,N-dimethylamino) propyl)-2, 7-fluorene)-alt-2, 7-(9, 9-dioctylfluorene)]</b> |
| <b>PS</b>                | <b>Pictet-Spengler</b>                                                                                |
| <b>PSS</b>               | <b>Poly(styrene sulfonate)</b>                                                                        |
| <b>PTCDA or PDA</b>      | <b>Perylene tetracarboxylic dianhydride</b>                                                           |
| <b>s (NMR)</b>           | <b>Singlet</b>                                                                                        |
| <b>SCE</b>               | <b>Standard calomel electrode</b>                                                                     |
| <b>SPS</b>               | <b>Solvent purification system</b>                                                                    |
| <b>t (NMR)</b>           | <b>Triplet</b>                                                                                        |
| <b>TA</b>                | <b>Transient absorption (spectroscopy)</b>                                                            |
| <b>TFSA</b>              | <b>Trifluoromethanesulphonic acid</b>                                                                 |
| <b>THF</b>               | <b>Tetrahydrofuran</b>                                                                                |
| <b>TLC</b>               | <b>Thin-layer chromatography</b>                                                                      |
| <b>TMS</b>               | <b>Tetramethylsilane</b>                                                                              |
| <b>TOL</b>               | <b>Toluene</b>                                                                                        |
| <b>VT</b>                | <b>Variable temperature</b>                                                                           |

**Symbols used-**

$\lambda$  denotes wavelength

$\Delta$  denotes heat

## CS or $\delta$ stands for chemical shift

### Materials and Methods

The reactions were carried out under an argon atmosphere wherever required. The chemicals were received from Sigma Aldrich and Spectrochem. Spectroscopic grade (UV grade) solvents were used for all the spectroscopic and electrochemical measurements. Silica gel mesh 100-120 was used for column chromatography, and silica gel 60 F<sub>254</sub> TLCs were used for monitoring reaction progress. Bruker Avance 500 MHz and 700 MHz spectrometer instruments were used for recording <sup>1</sup>H and <sup>13</sup>C NMR spectra in solvent CDCl<sub>3</sub>. Chemical shifts were calibrated in parts per million (ppm) relative to the residual solvent signals and TMS signals. HRMS (APCI and ESI) were recorded on a Bruker micro TOF-QII mass spectrometer. Matrix-assisted-LASER desorption/ionization (MALDI) were recorded using the Bruker Ultra Flexreme MALDI-TOF mass spectrometer. Steady-state absorptions were recorded on a Perkin Elmer LAMBDA 950 UV/VIS/NIR spectrophotometer with a 1 cm path length quartz cuvette, and steady-state fluorescence emission measurements were recorded on a Horiba Scientific spectrophotometer. Cyclic voltammetry (CV) experiments using CH potentiostat were performed on the CH instrument. CV and DPV experiments were done using a conventional three-electrode system consisting of a glassy-carbon electrode as the working electrode, a saturated calomel electrode (SCE) as a reference electrode, and Pt-wire as the counter electrode, and all the data were recorded using 0.1 M solutions of tetrabutylammonium hexafluorophosphate (TBAP) as supporting electrolyte in dichloromethane. All the voltammograms were recorded at a scan rate of 100 mV/s at room temperature. Single crystal X-ray diffraction (SCXRD) measurements were done at 100 K on a Bruker D8 Venture diffractometer with a CCD detector with Mo-K $\alpha$  radiation. Density functional theory (DFT) calculations were performed using the Gaussian 09 program with the B3LYP exchange-correlation function.<sup>1</sup>

**Device fabrication and characterization:** We have fabricated the polymer solar cells (PSCs) with the conventional configuration ITO/ PEDOT:PSS / **PDPP or Zn-PDPP**: PC<sub>71</sub>BM / PFN-Br/Al. The ITO coated glass substrates were cleaned in detergent, and subsequently ultrasonicated in deionized water, acetone, and isopropyl alcohol and dried in vacuum oven to remove all the traces of residues. For each molecule, the photovoltaic performance optimization process was started with identifying the donor (**PDPP or Zn-PDPP**) to acceptor (PC<sub>71</sub>BM) ratio (weight ratio varying from 1:0.4 to 1:6) with 16 mg/mL concentration in chloroform solution. We have added 5 % pyridine as solvent additive and after that solvent vapor annealing was applied to maximize the performance of the PSCs. The devices were fabricated by depositing PEDOT:PSS as hole transport layer having thickness of 35-40 nm. The BHJ active layer was deposited by spin coating (2500 rpm, 60 s) on the top of PEDOT:PSS layer under ambient conditions. For the solvent vapor annealing (SVA), the optimized active layer was exposed to the THF vapours for 40s. A thin layer of PFN-Br was spin coated on the top of the active layer from the methanol solution. The aluminium (Al) electrode was deposited onto the top of PFN layer *via* thermal evaporation at the pressure less than 10<sup>-5</sup> Torr. The current-voltage characteristics of the OSCs were measured under illumination intensity of 100 mW/cm<sup>2</sup> (AM1.5 G) using a solar simulator and a Keithley 2400 source meter unit. The incident photon to current conversion efficiency (IPCE) measurements were performed using Bentham IPCE system.

The hole only (ITO/PEDOT:PSS/active layer/Au and electron only (ITO/ZnO/active layer/Al) were fabricated as in a same manner as employed for OSCs. Dark J-V characteristics were measured and fitted with space charge limited current model to estimate the hole and electron mobilities.

For transient photocurrent (TPC) and transient photovoltage (TPV) measurements, the device was mounted on a conductive clip and under steady-state illumination from a focused quartz tungsten halogen lamp light source. An optical perturbation is applied to the device with 1kHz femtosecond pulse laser under 500 nm excitation. The TPV signal was acquired by a digital oscilloscope at open circuit condition. The TPC signal was measured under short circuit condition by applying a 50  $\Omega$  resistor.

### Formulas used:

LUMO and HOMO energies are calculated using the following formulae for electrochemical data:

$$E_{\text{LUMO}} = E_{\text{LUMO vs SCE}} = -(E_{1/2}^{\text{red}} + 4.41) \text{ eV}$$

$E_{\text{LUMO}}$  = energy of lowest unoccupied molecular orbital

$$E_{\text{HOMO}} = E_{\text{HOMO vs SCE}} = -(E_{1/2}^{\text{oxid}} + 4.41) \text{ eV}$$

$E_{\text{HOMO}}$  = energy of highest occupied molecular orbital

$E_{1/2}^{\text{red}}$  = electrochemical potential of 1st reduction

$E_{1/2}^{\text{oxid}}$  = electrochemical potential of 1st oxidation

$$E_{\text{opt}} = 1240/\lambda_{\text{onset}}$$

Where,  $E_{\text{opt}}$  is the optical band gap and  $\lambda_{\text{onset}}$  is the onset of absorption.

## Syntheses and Procedures

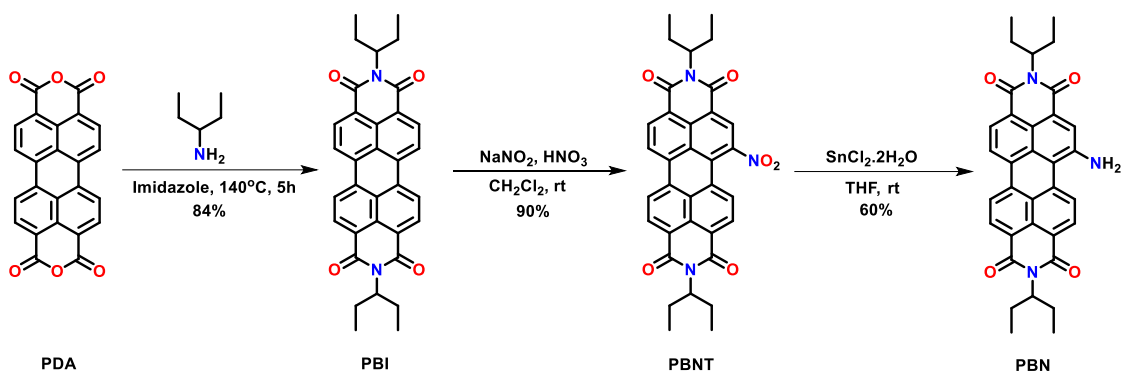

Figure S1. Synthetic scheme for PBI precursors

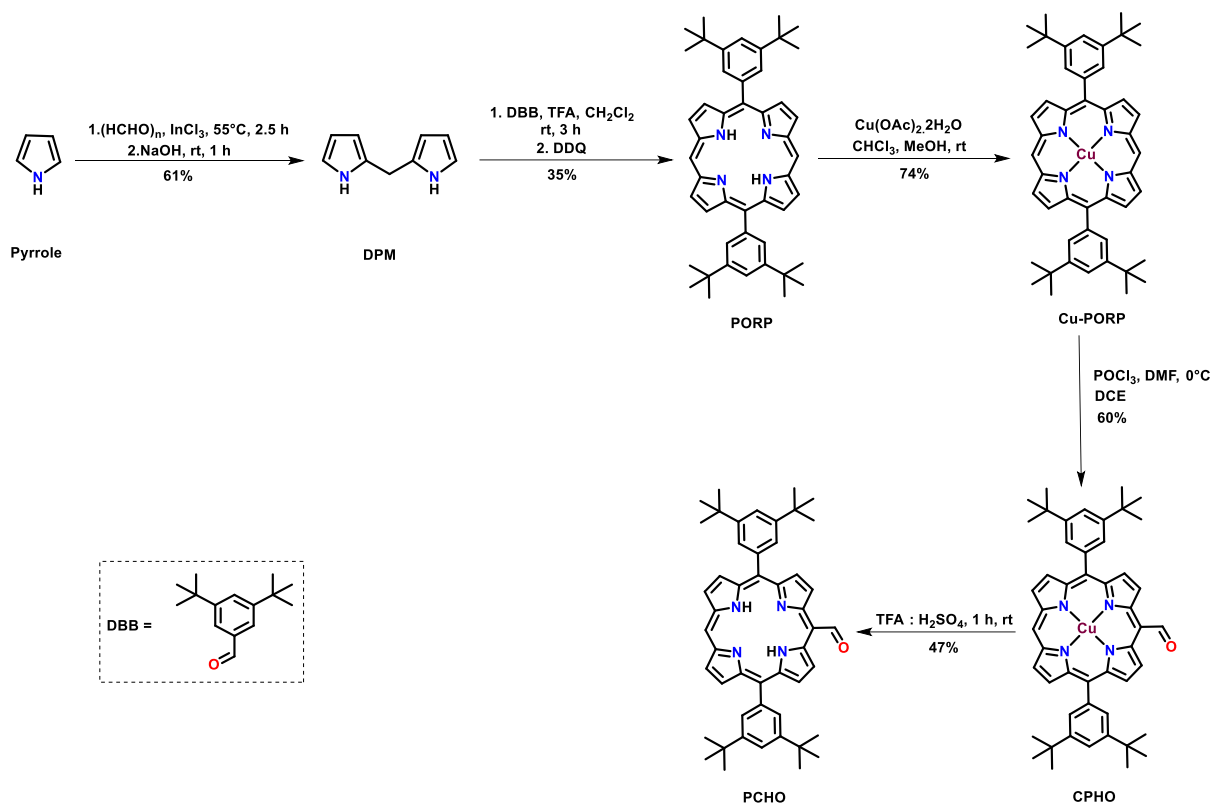

Figure S2. Synthetic scheme for porphyrin precursors

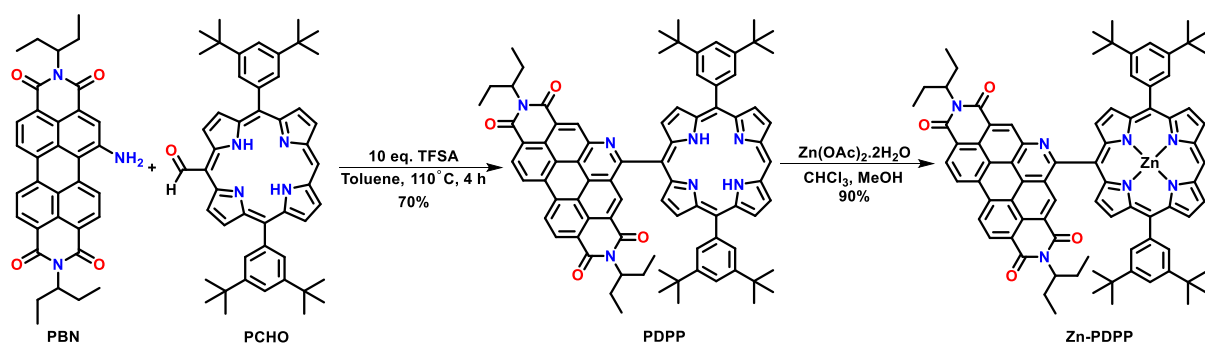

Figure S3. Synthetic scheme for PDPP and Zn-PDPP

## Synthetic Procedures

### Synthesis of N, N'-Di(3-pentyl)-perylene-3,4:9,10-tetracarboxylic acid bisimide (PBI)

A mixture of perylene-3,4,9,10-tetracarboxylic acid bisanhydride (**PTCDA** or **PDA**) (2.8 g, 7 mmol), 3-pentylamine (2 ml, 17 mmol) and imidazole (40 g) was stirred at 140°C for 5h, and then the mixture was diluted with ethanol. This was followed by the addition of 2M HCl. The reaction mixture was allowed to settle down. The precipitates formed were collected by vacuum filtration and washed with water until the filtrate was pH neutral; it was then oven-dried and purified by repetitive silica gel column chromatography (chloroform-hexane) to get the desired product in 84% yield. **<sup>1</sup>H NMR (500 MHz, CDCl<sub>3</sub>)** δ (ppm): 8.68 (d, *J* = 8 Hz, 4H), 8.63 (d, *J* = 8.0 Hz, 4H), 5.07 (m, 2H), 2.27 (m, 4H), 1.95 (m, 4H), 0.93 (t, *J* = 7.5 Hz, 12H). **HRMS (ESI/Q-TOF) m/z:** [M+H]<sup>+</sup> calculated for C<sub>34</sub>H<sub>30</sub>N<sub>2</sub>O<sub>4</sub>: 531.2278; found: 531.2249.

### Synthesis of N, N'-Di(3-pentyl)-1-nitro-perylene-3,4:9,10-tetracarboxylic acid bisimide (PBNT)

**PBI** (2.6 g, 4.9 mmol) was added to a 250 mL round-bottom flask, and 150 mL of anhydrous dichloromethane was then added as a solvent. While stirring, concentrated nitric acid (6.0 g, 4.0 mL) was added drop-wise in the air. After the complete addition of HNO<sub>3</sub>, the reaction mixture was allowed to stir under air for 2 h while being monitored by TLC. After 2 h, TLC analysis indicated the complete conversion to the desired product. Work-up for the reaction mixture was done with sodium hydroxide and water; the organic product was extracted with dichloromethane (DCM). The organic phase was collected, and the solvent was removed in a vacuum. This was purified by column chromatography (neutral alumina) with DCM being the mobile phase to obtain a bright red solid in 90% yield. **<sup>1</sup>H NMR (500 MHz, CDCl<sub>3</sub>)** δ (ppm): 8.80 (d, 2H), 8.71 (m, 4H), 8.26 (d, *J* = 8 Hz, 1H), 5.05 (m, 2H), 2.25 (m, 4H), 1.94 (m, 4H), 0.92 (t, 12H). **HRMS (ESI/Q-TOF) m/z:** [M+H]<sup>+</sup> calculated for C<sub>34</sub>H<sub>29</sub>N<sub>3</sub>O<sub>6</sub>: 576.212; found: 576.215.

### Synthesis of N, N'-Di(3-pentyl)-1-amino-perylene-3,4:9,10-tetracarboxylic acid bisimide (PBN)

**PBNT** (1.11 g, 1.93 mmol) and tin (II)chloride dihydrate (2.63 g, 11.58 mmol) were dissolved in 70 mL THF. Under an inert atmosphere, the reaction was stirred for 30 min at room temperature and then 2 h under reflux. The blue reaction mixture was diluted with 200 mL ethyl acetate and after the addition of 100 mL saturated sodium hydrogen carbonate solution, a white precipitate occurred, which was filtered off. The organic solution was washed with 100 mL brine and twice with 100 mL water. Column chromatography (Basic alumina, DCM/ethyl acetate) gave (0.63g) 60% of a blue solid. **<sup>1</sup>H NMR (500 MHz, CDCl<sub>3</sub>)** δ (ppm): 8.90 (d, *J* = 8 Hz, 1H), 8.70 (m, 2H), 8.66 (d, *J* = 8 Hz, 1H), 8.59 (d, 1H), 8.49 (d, 1H), 8.17 (s, 1H), 5.15 (s, 2H), 5.06 (m, 2H), 2.27 (m, 4H), 1.94 (m, 4H), 0.93 (m, 12H). **HRMS (ESI/Q-TOF) m/z:** [M+H]<sup>+</sup> calculated for C<sub>34</sub>H<sub>31</sub>N<sub>3</sub>O<sub>4</sub>: 546.238; found: 546.238.

**Synthesis of meso-free dipyrromethane (DPM):** The synthesis of dipyrromethane involved taking paraformaldehyde (0.15 g, 5 mmol) and pyrrole (17 mL) in a 250 mL round bottomed flask. The flask was covered by aluminium foil and fitted with a septum. The flask and its contents were de-gassed using argon and the setup was placed in an oil bath at 60°C. After half an hour, indium chloride (0.111 g, 0.5 mmol) was added, and the reaction was continued with for three hours. Upon completion, sodium hydroxide pellets (0.6 g) were added. The separation



techniques involved the use of separating funnel and column chromatography to isolate the desired product from other by-products (namely, polypyrroles). Further purification was done by column chromatography, affording white crystals (yield: 61%).  $^1\text{H NMR}$  (400 MHz,  $\text{CDCl}_3$ )  $\delta$  (ppm): 7.82 (br s, 2H), 6.65 (s, 2H), 6.15 (d, 2H), 6.04 (s, 2H), 3.97 (s, 2H). **MALDI (Q-TOF) m/z**: calculated for  $\text{C}_9\text{H}_{10}\text{N}_2$ : 146.08; found: 146.06.

**Synthesis of 5,15-Bis(3,5-di-tert-butylphenyl) porphyrin (PORP)**: This particular step involved synthesizing the porphyrin, using 3,5-di-tert-butylbenzaldehyde (1.88 g, 8.65 mmol), **DPM** (1.26 g, 8.65 mmol) and dissolving it in dichloromethane (1.5 L). The solution was degassed and trifluoroacetic acid (300  $\mu\text{L}$ ) was added. The reaction proceeded for three hours. The penultimate addition was that of dichlorodicyanoquinone (2.60 g, 11.24 mmol) followed by addition of triethylamine (11 mL) for quenching the acidic residue. Finally, after evaporation of the solvent and putting the remains through a round of column chromatography, the synthesis of 5, 15-bis(3, 5-di-tert-butylphenyl)porphyrin was completed. (yield: 35%).  $^1\text{H NMR}$  (500 MHz,  $\text{CDCl}_3$ )  $\delta$  (ppm): 10.32 (s, 2H, H-meso), 9.41 (d,  $J=4.5$  Hz, 4H, H- $\beta$ ), 9.15 (d,  $J=4.5$  Hz, 4H, H- $\beta$ ), 8.16 (d, 4H, Ar-H), 7.85 (s, 2H, Ar-H), 1.58 (s, 36H,  $\text{CH}_3$ ), -3.00 (s, 2H, NH). **HRMS (ESI/Q-TOF) m/z**:  $[\text{M}+\text{H}]^+$  calculated for  $\text{C}_{48}\text{H}_{54}\text{N}_4$ : 687.442; found: 687.442

**Synthesis of 5, 15-bis(3,5-di-tertbutylphenyl) porphinato copper (Cu-PORP)**: Metallation on the already synthesized **PORP** (1 g, 1.455 mmol) was done. In a 250 mL round bottomed flask, porphyrin was dissolved in 30 mL chloroform and 25 mL methanol was added to it. Cupric acetate(monohydrate) was added in excess (3 g) and the contents were stirred on a magnetic stirrer, overnight. This was followed by extraction using dichloromethane. This functionalization is necessary because the subsequent formylation reaction has reactants like  $\text{POCl}_3$ , that can decompose the free-base porphyrin moiety. The mixture was further purified by recrystallization to get pure **Cu-PORP** in 74% yield. **HRMS (ESI/Q-TOF) m/z**:  $[\text{M}+\text{H}]^+$  calculated for  $\text{C}_{48}\text{H}_{52}\text{CuN}_4$ : 748.35; found: 748.35

**Synthesis of 5-formyl-10,20-bis(3,5-ditertbutylphenyl) porphinato copper (CPHO)**:

In a 1L two-neck round-bottomed flask equipped with a reflux condenser and a dropping funnel, anhydrous dimethylformamide (60 mL) was added. Phosphorous oxychloride (50 mL) was added dropwise using the dropping funnel and the setup was maintained in an ice bath. After the orange-coloured DMF- $\text{POCl}_3$  complex was formed and started solidifying, the ice bath was replaced by an oil bath, and it was heated to about 50°C. The funnel was covered by aluminium foil and a solution of copper porphyrin in 250 mL 1, 2-dichloroethane was added dropwise to the complex. The mixture was heated at 50°C, overnight. After cooling in an ice bath, a saturated solution of sodium acetate was added to the mixture and stirred overnight. This completed the hydrolysis. The extraction was done in dichloromethane and water and subsequently in a saturated solution of sodium bicarbonate and in brine (10% NaCl). The solution was passed through sodium sulphate and finally the monoformylated product was purified using column chromatography with dichloromethane and hexane (yield: 60%). **HRMS (ESI/Q-TOF) m/z**:  $[\text{M}+\text{H}]^+$  calculated for  $\text{C}_{49}\text{H}_{52}\text{CuN}_4\text{O}$ : 776.351; found: 776.349.

**Synthesis of 10,20-Bis(3,5-ditertbutylphenyl)-porphyrin-5-carboxaldehyde (PCHO)**: In a 100 mL round bottomed flask, 5-formyl-10,20-bis(3,5-ditertbutylphenyl) porphinato copper **CPHO** (100 mg) was taken and a 1:1 mixture (40 mL) of trifluoroacetic acid and concentrated sulphuric acid was added to the flask. The contents were subjected to stirring for an hour. This was followed by extraction into a flask filled with ice and dichloromethane was used for transferring it. The separation was done using a separating funnel and aqueous sodium

hydrogen carbonate solution was used after washing it thoroughly with dichloromethane and water. Purification was done using column chromatography. (yield: 47%). **<sup>1</sup>H NMR (500 MHz, CDCl<sub>3</sub>)** δ (ppm): 12.62 (s, 1H), 10.25 (s, 1H), 10.09 (d, 2H), 9.29 (d, 2H), 9.11 (d, 2H), 8.93 (d, 2H), 8.08 (s, 4H), 7.86 (s, 2H), 1.57 (s, 36H), -2.34 (s, 2H, NH). **HRMS (ESI/Q-TOF) m/z:** [M+H]<sup>+</sup> calculated for C<sub>49</sub>H<sub>54</sub>N<sub>4</sub>O: 715.437; found: 715.439.

**Synthesis of PDPP:** 1-aminoperylenebisimide (**PBN**) (48 mg, 0.089 mmol), 10,20-bis(3,5-ditertbutylphenyl)-porphyrin-5-carboxaldehyde (**PCHO**) (127 mg, 0.178 mmol) and trifluoromethanesulphonic acid (TFSA) (78 μL, 0.89 mmol) were dissolved in 10-15 mL dry toluene, heated for 3 h at 110°C under an argon atmosphere and a color change to reddish-brown was observed. The heating was then stopped, and the reaction mixture was allowed to cool down to room temperature. The reaction was then quenched by addition of 30 mL water and thereafter neutralized with 15% sodium hydroxide solution. Then 50 mL of ethyl acetate and 25 ml brine were added, the organic phase was separated and washed with 100 mL of water. The crude product was further purified by column chromatography (basic alumina, chloroform) and recrystallization to give 76 mg (70%) of a dark purple solid. **<sup>1</sup>H NMR (500 MHz, CDCl<sub>3</sub>)** δ (ppm): 10.33(s, 1H), 9.85(s, 1H), 9.52(d, J = 8.5 Hz, 1H), 9.48(d, J = 8 Hz, 1H), 9.41(d, J = 4.5 Hz, 2H), 9.26(d, J = 8 Hz, 1H), 9.16(d, J = 8 Hz, 1H), 9.11(d, J = 4.5 Hz, 2H), 8.89(d, J = 5 Hz, 2H), 8.65(s, 1H), 8.32(d, J = 4.5 Hz, 2H), 8.21(m, 2H), 8.07(m, 2H), 7.78(m, 2H), 5.23(m, 2H), 2.37(m, 4H), 2.04(m, 4H), 1.53(m, 25H), 1.25(m, 6H), 1.02(m, 7H), 0.88(m, 3H), 0.66(m, 7H), -2.61(s, 2H). **<sup>13</sup>C{<sup>1</sup>H} (175 MHz, CDCl<sub>3</sub>)** δ (ppm): 163.33, 149.01, 148.98, 142.91, 140.48, 133.30, 130.21, 130.16, 127.77, 127.24, 124.20, 123.93, 123.58, 122.96, 121.77, 121.08, 113.37, 106.09, 58.13, 57.74, 35.10, 35.06, 31.75, 31.72, 31.61, 26.93, 25.13, 24.76, 22.67, 14.14, 11.45, 11.13. **HRMS-APCI (m/z):** calculated for C<sub>83</sub>H<sub>81</sub>N<sub>7</sub>O<sub>4</sub>: 1240.6423; found: 1240.6409.

**Synthesis of Zn-PDPP:** **PDPP** (20 mg, 0.016 mmol) was dissolved in 20 mL of chloroform and zinc acetate dihydrate (added in excess) and 5 mL of methanol was added. The solution was stirred for 4 h at room temperature. The reaction mixture was extracted with water and chloroform and then dried over anhydrous sodium sulphate. Recrystallization was done using DCM-MeOH to obtain pure product as a reddish-brown solid in 90% yield. **<sup>1</sup>H NMR (500 MHz, CDCl<sub>3</sub>)** δ (ppm): 10.39(s, 1H), 9.83(s, 1H), 9.53(d, J = 8.5 Hz, 1H), 9.49(d, J = 8.5 Hz, 1H), 9.48(d, J = 4.5 Hz, 2H), 9.23(d, J = 8 Hz, 1H), 9.20(d, J = 4.5 Hz, 2H), 9.19 (d, J = 8.5 Hz, 1H), 8.99(d, J = 4.5 Hz, 2H), 8.66(s, 1H), 8.42(m, 2H), 8.20 (m, 2H, Ar), 8.08(m, 2H, Ar), 7.78(m, 2H, Ar), 5.19-4.74(m, 2H), 2.37 (m, 2H), 2.02 (m, 3H), 1.72-1.65 (m, 3H), 1.51 (s, 36H), 1.00 (t, 6H), 0.64 (t, 6H). **<sup>13</sup>C{<sup>1</sup>H} (175 MHz, CDCl<sub>3</sub>)** δ (ppm): 163.76, 151.22, 150.42, 149.97, 149.82, 148.69, 148.67, 141.46, 133.71, 133.17, 132.11, 130.46, 130.03, 129.96, 122.80, 120.86, 107.15, 58.10, 57.72, 35.08, 35.04, 31.76, 31.73, 25.11, 24.75, 11.42, 11.10. **HRMS-ESI (m/z):** calculated for C<sub>83</sub>H<sub>79</sub>N<sub>7</sub>O<sub>4</sub>Zn: 1302.5558; found: 1302.5531.

## NMR Spectra

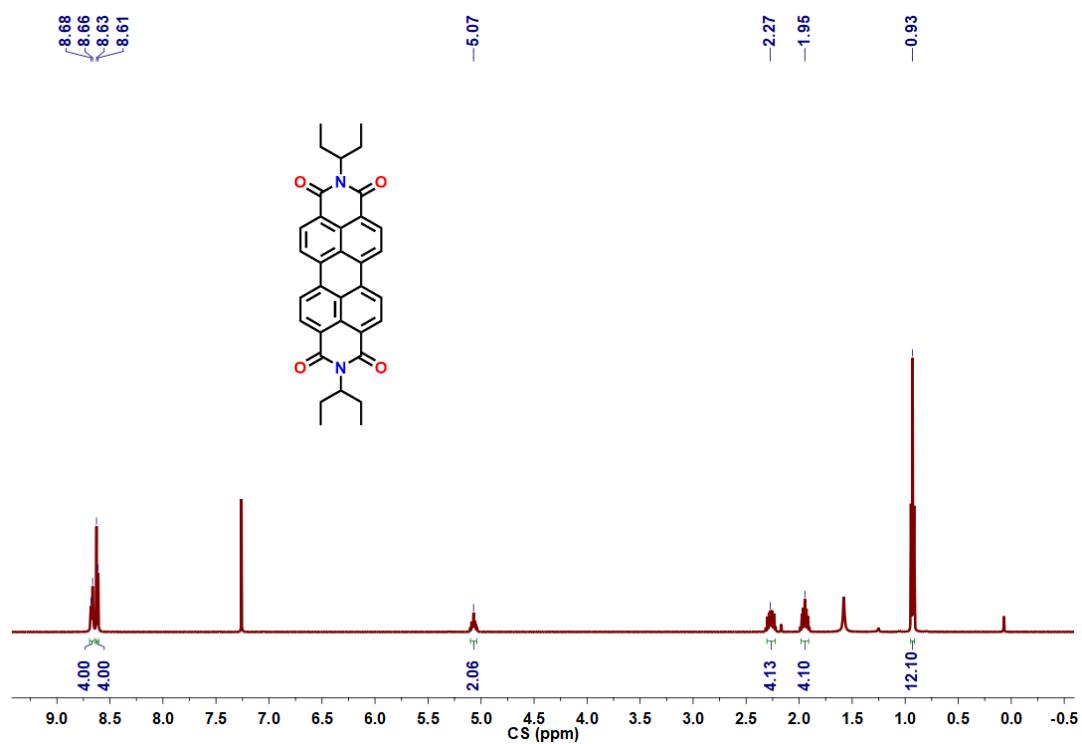

Figure S4.  $^1\text{H}$  NMR spectra of **PBI** in  $\text{CDCl}_3$  (500 MHz) at 298K

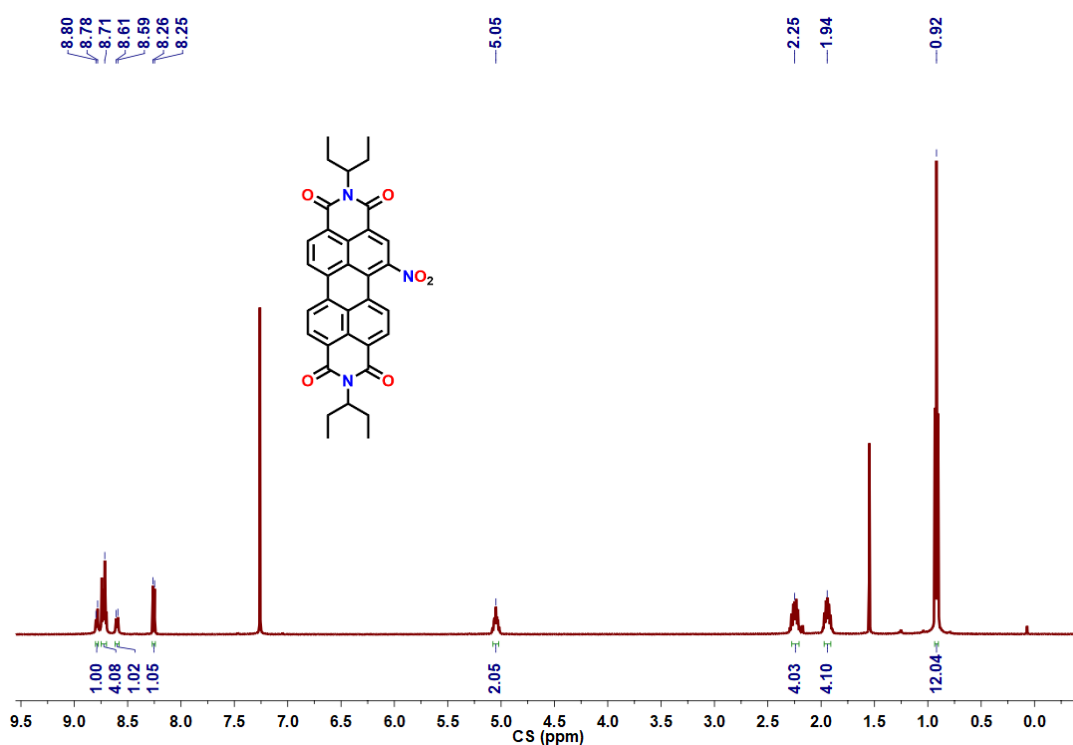

Figure S5.  $^1\text{H}$  NMR spectra of **PBNT** in  $\text{CDCl}_3$  (500 MHz) at 298K

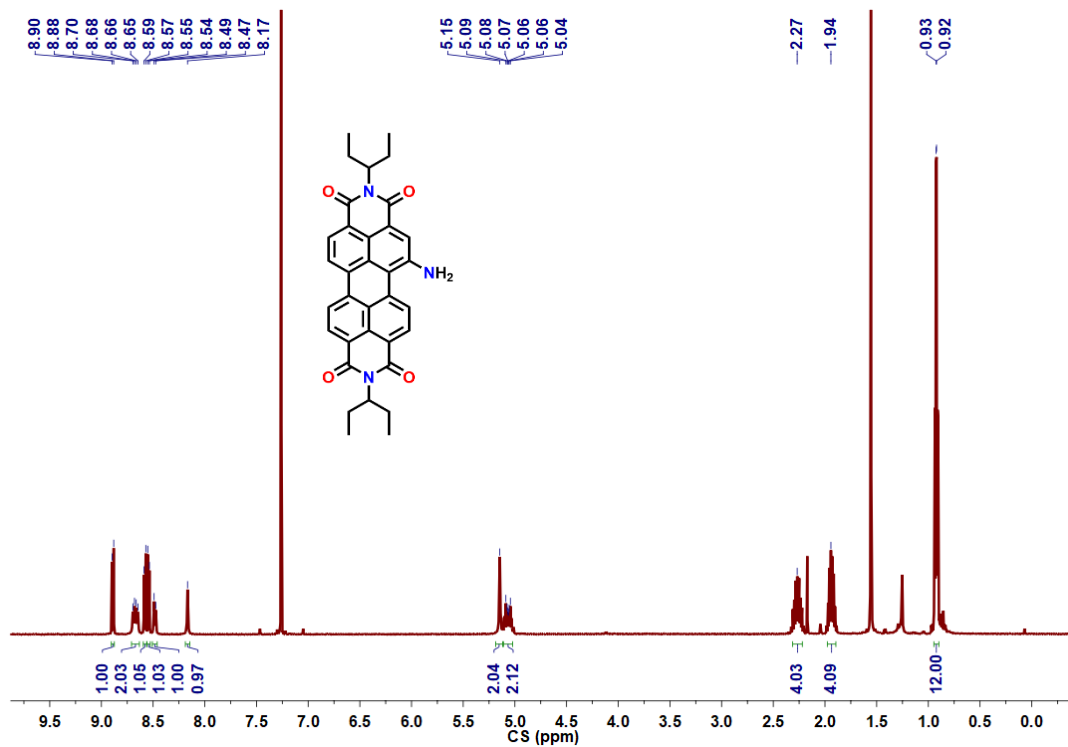

Figure S6.  $^1\text{H}$  NMR spectra of **PBN** in  $\text{CDCl}_3$  (500 MHz) at 298K

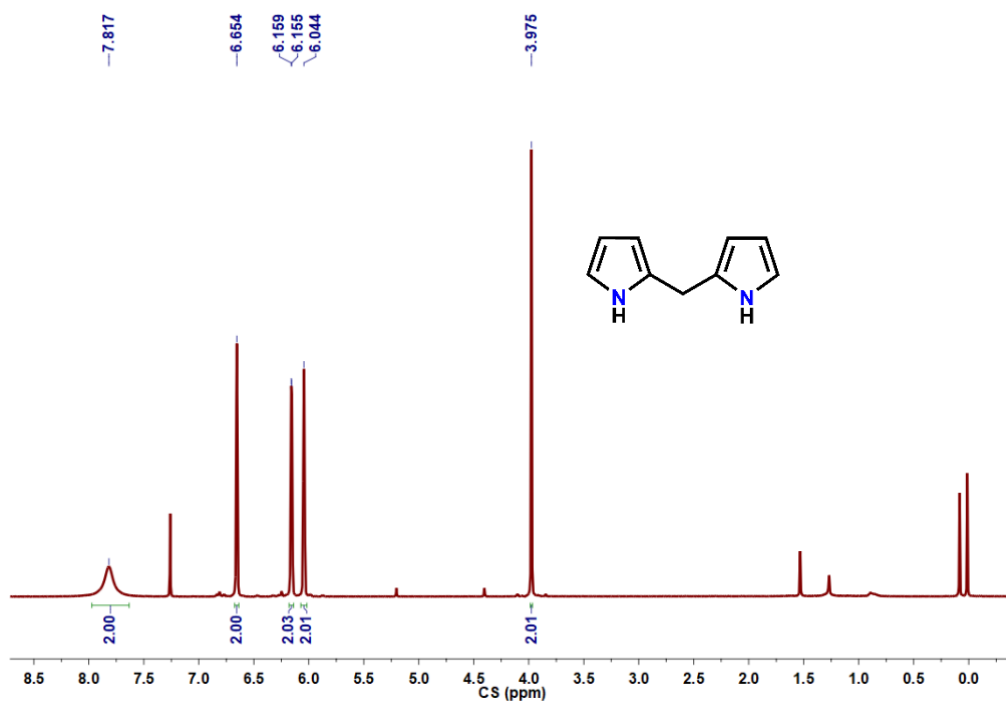

Figure S7.  $^1\text{H}$  NMR spectra of **DPM** in  $\text{CDCl}_3$  (500 MHz) at 298K

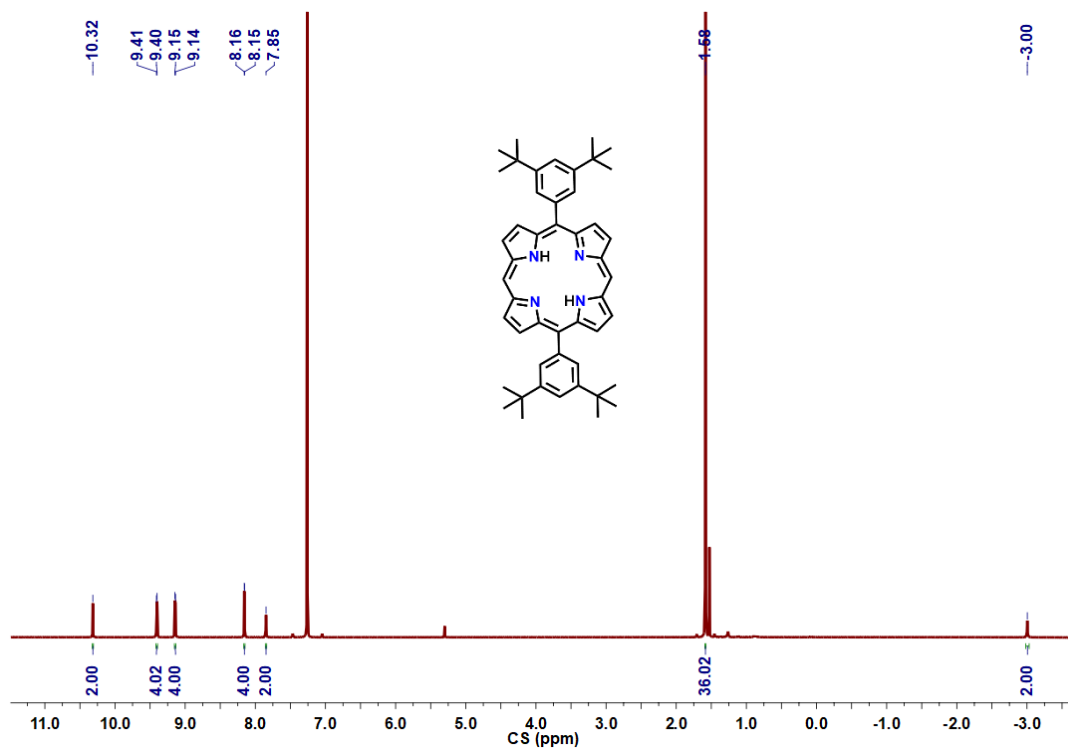

**Figure S8.**  $^1\text{H}$  NMR spectra of **PORP** in  $\text{CDCl}_3$  (500 MHz) at 298K

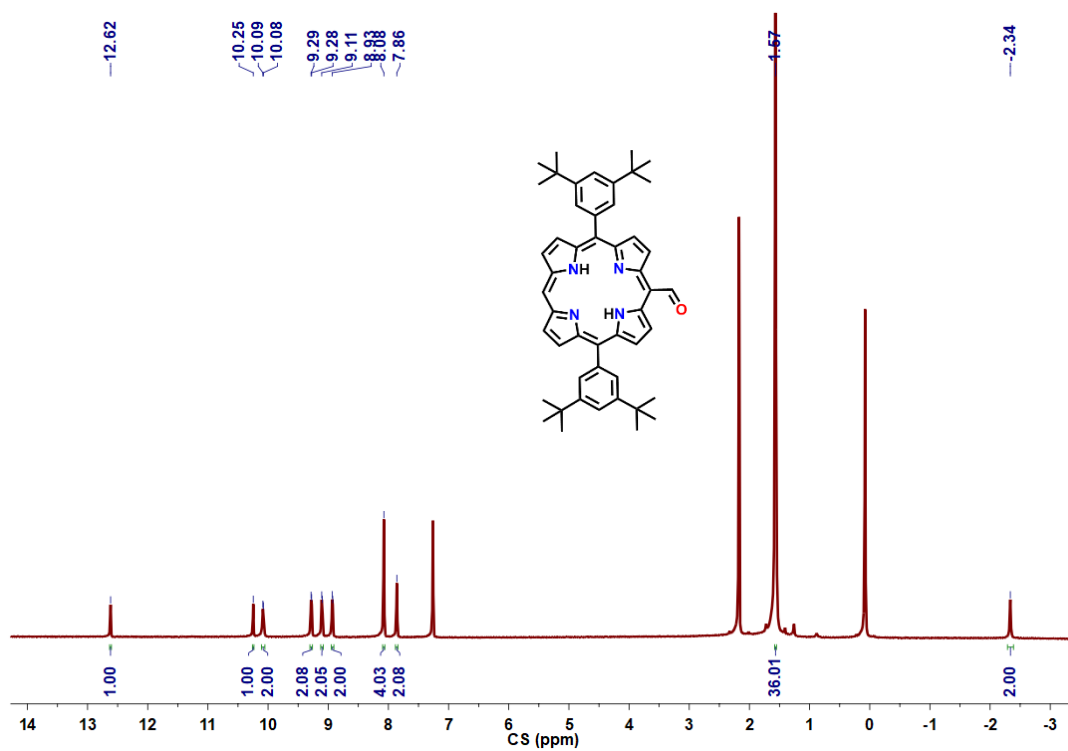

**Figure S9.**  $^1\text{H}$  NMR spectra of **PCHO** in  $\text{CDCl}_3$  (500 MHz) at 298K

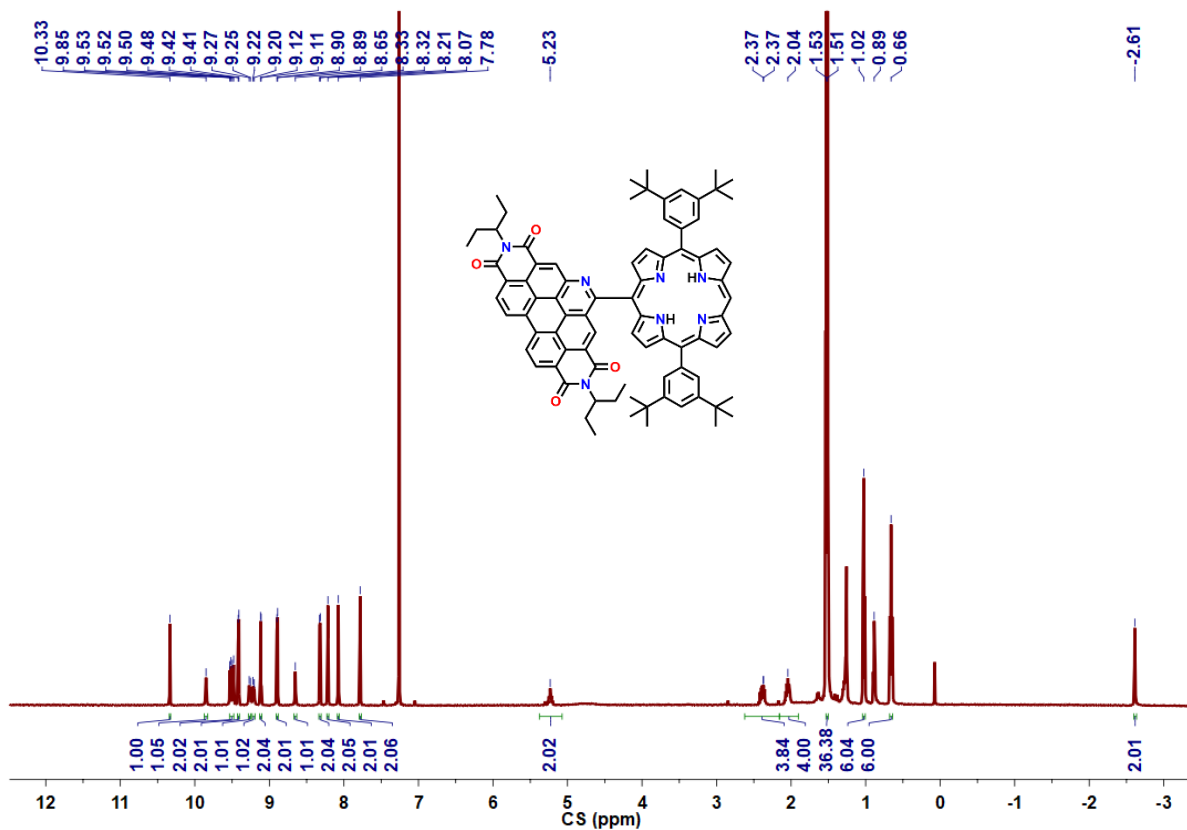

Figure S10.  $^1\text{H}$  NMR spectra of PDPP in  $\text{CDCl}_3$  (500 MHz) at 298K

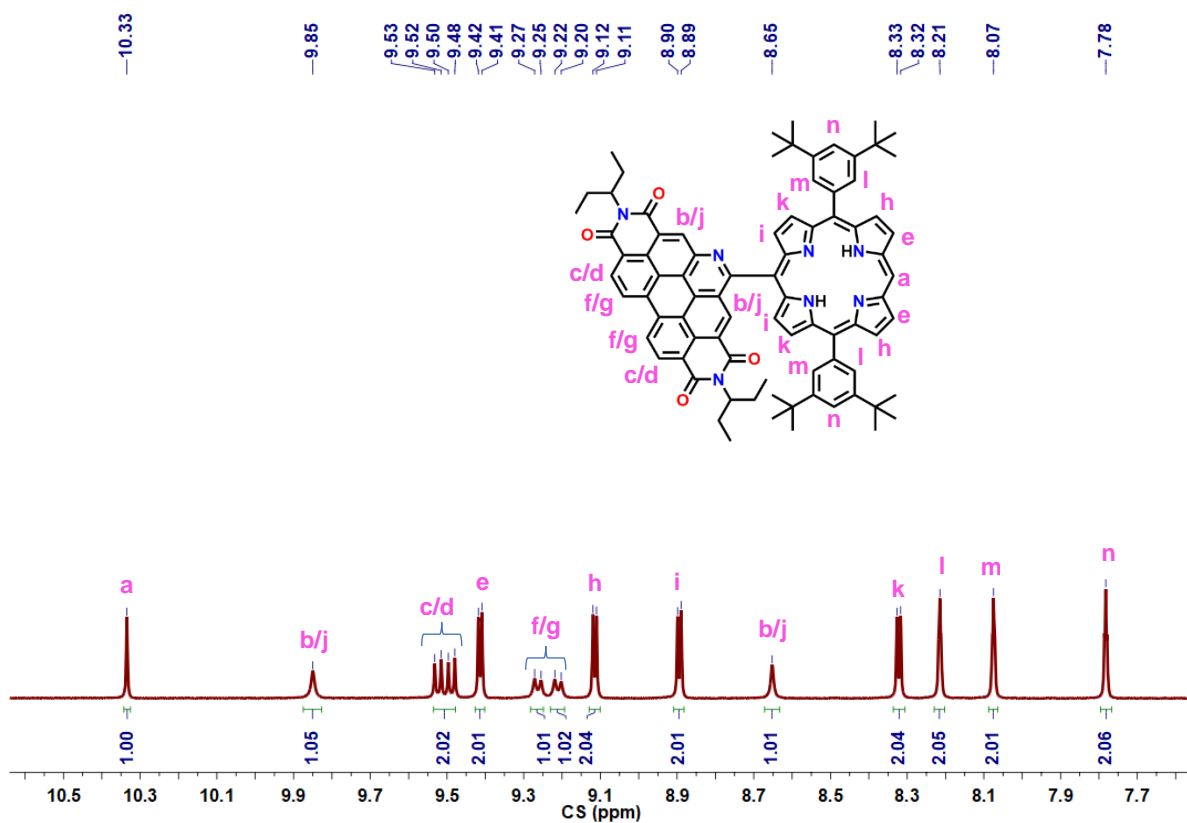

Figure S11. Partial  $^1\text{H}$  NMR spectra of PDPP in  $\text{CDCl}_3$  (500 MHz) at 298K

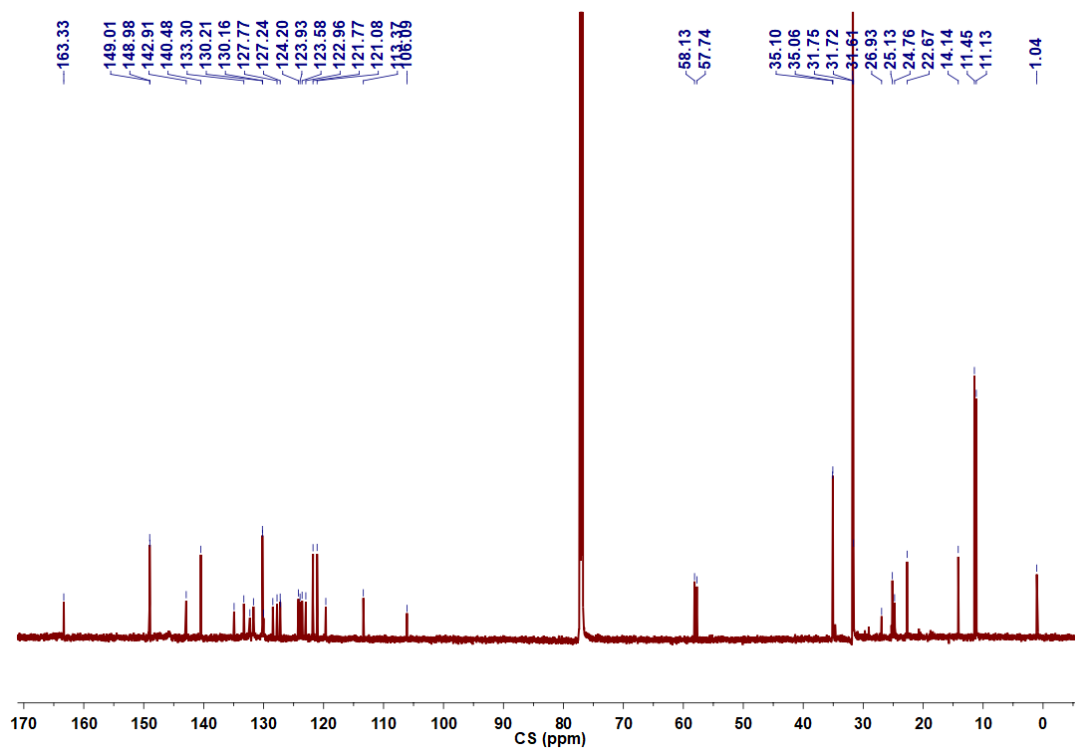

Figure S12.  $^{13}\text{C}\{^1\text{H}\}$  NMR spectra of **PDPP** in  $\text{CDCl}_3$  (175MHz) at 298K

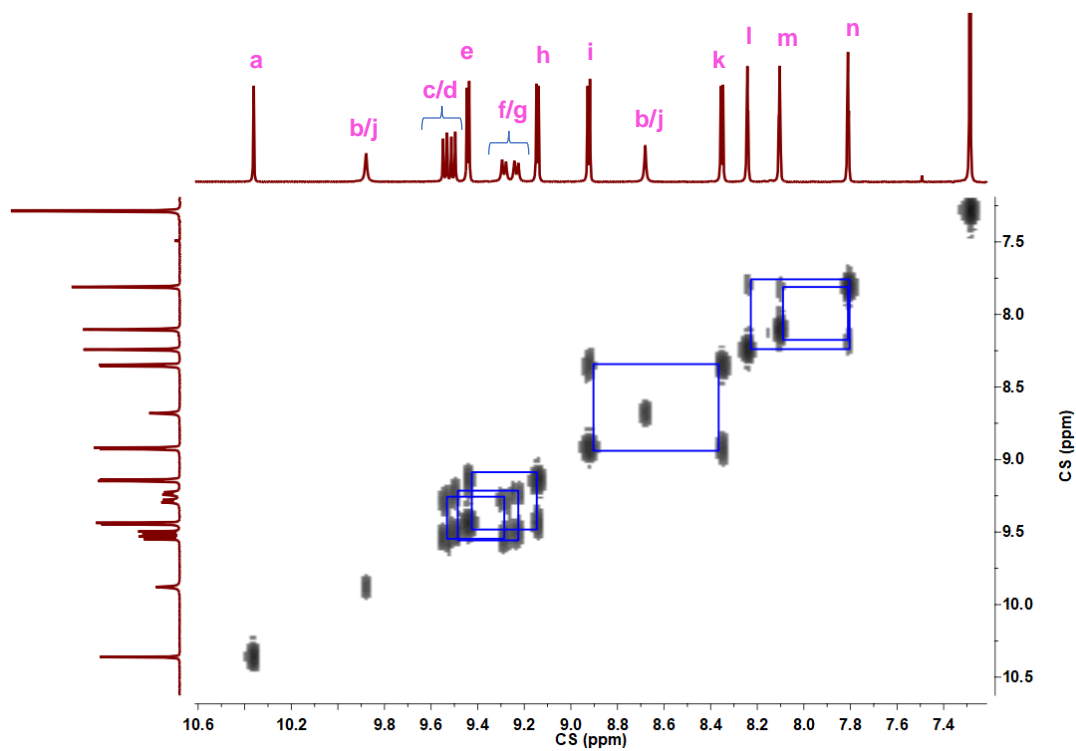

Figure S13.  $^1\text{H}\text{-}^1\text{H}$  COSY NMR spectra of **PDPP** in  $\text{CDCl}_3$  (500 MHz) at 298K

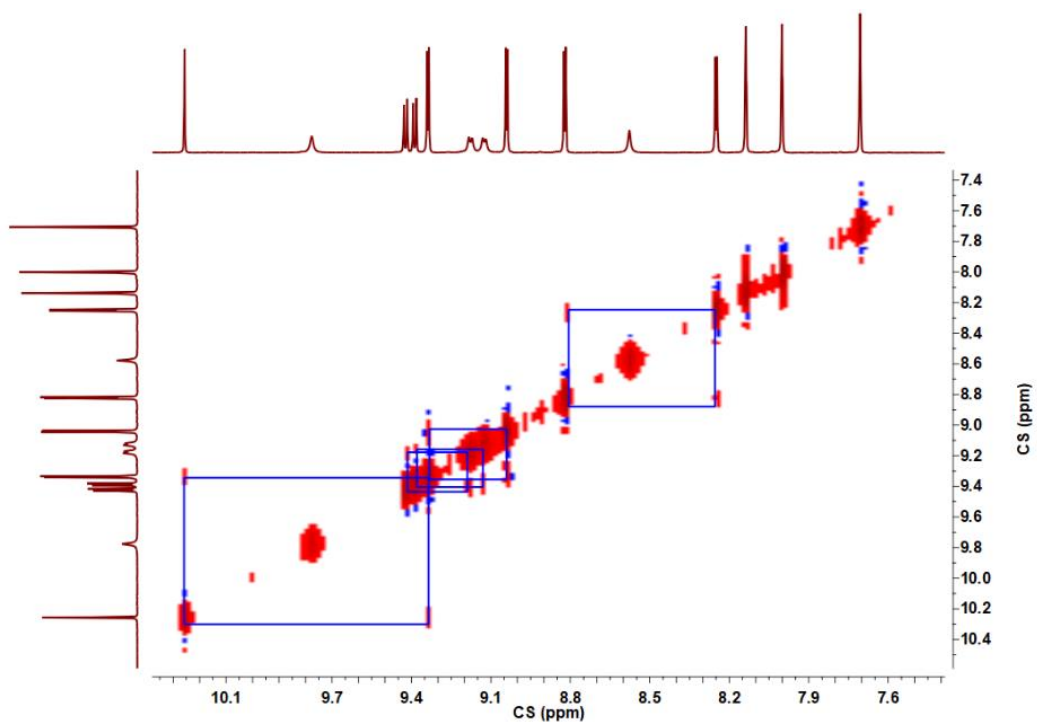

**Figure S14.**  $^1\text{H}$ - $^1\text{H}$  NOESY NMR spectra of **PDPP** in  $\text{CDCl}_3$  (500 MHz) at 298K

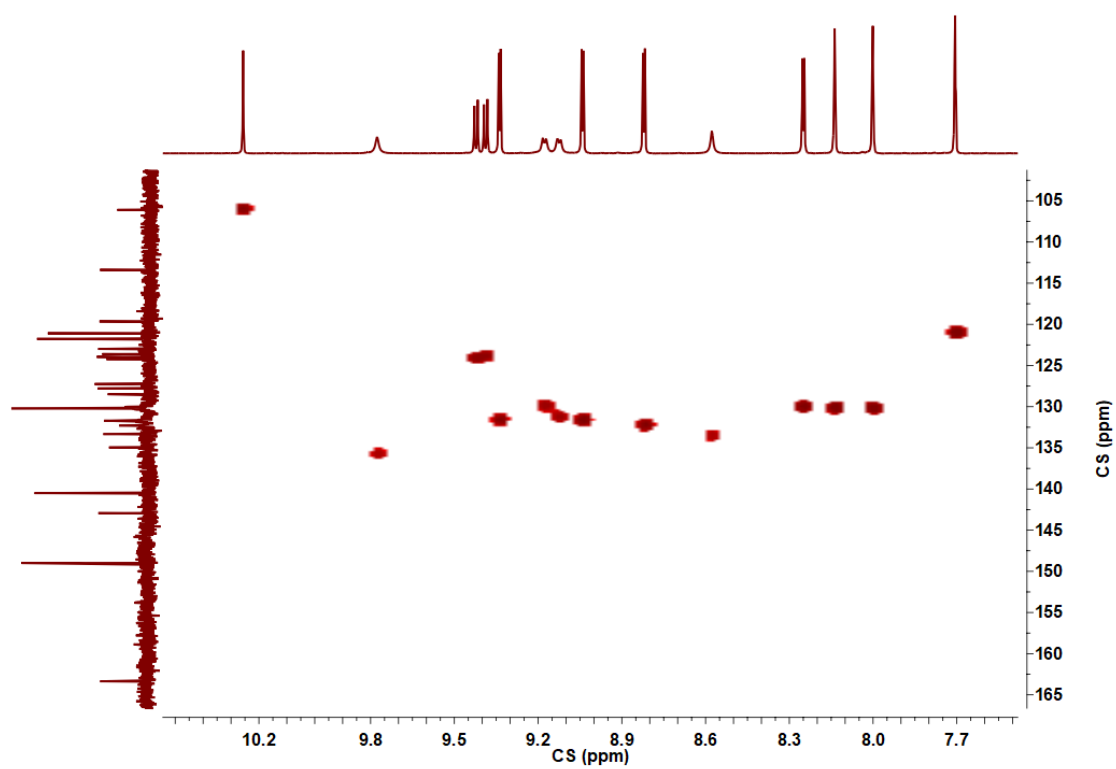

**Figure S15.**  $^1\text{H}$ - $^{13}\text{C}$  HSQC NMR spectra of **PDPP** in  $\text{CDCl}_3$  (500 MHz) at 298K



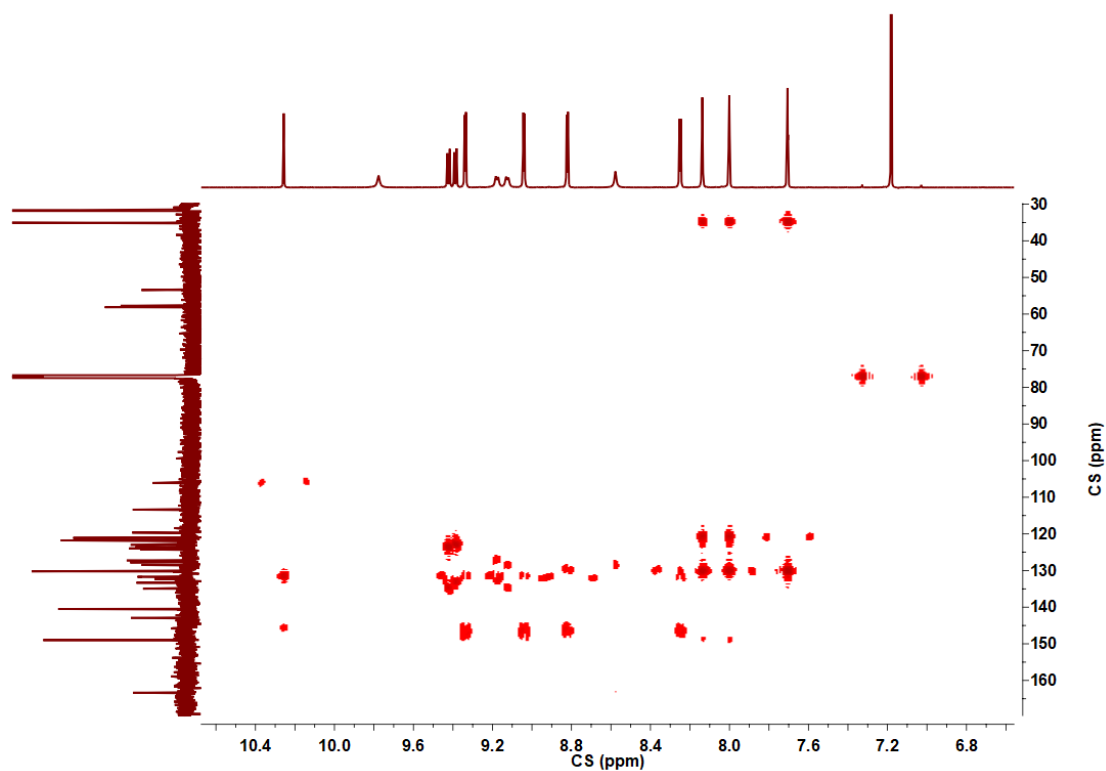

**Figure S16.**  $^1\text{H}$ - $^{13}\text{C}$  HMBC NMR spectra of **PDPP** in  $\text{CDCl}_3$  (500 MHz) at 298K

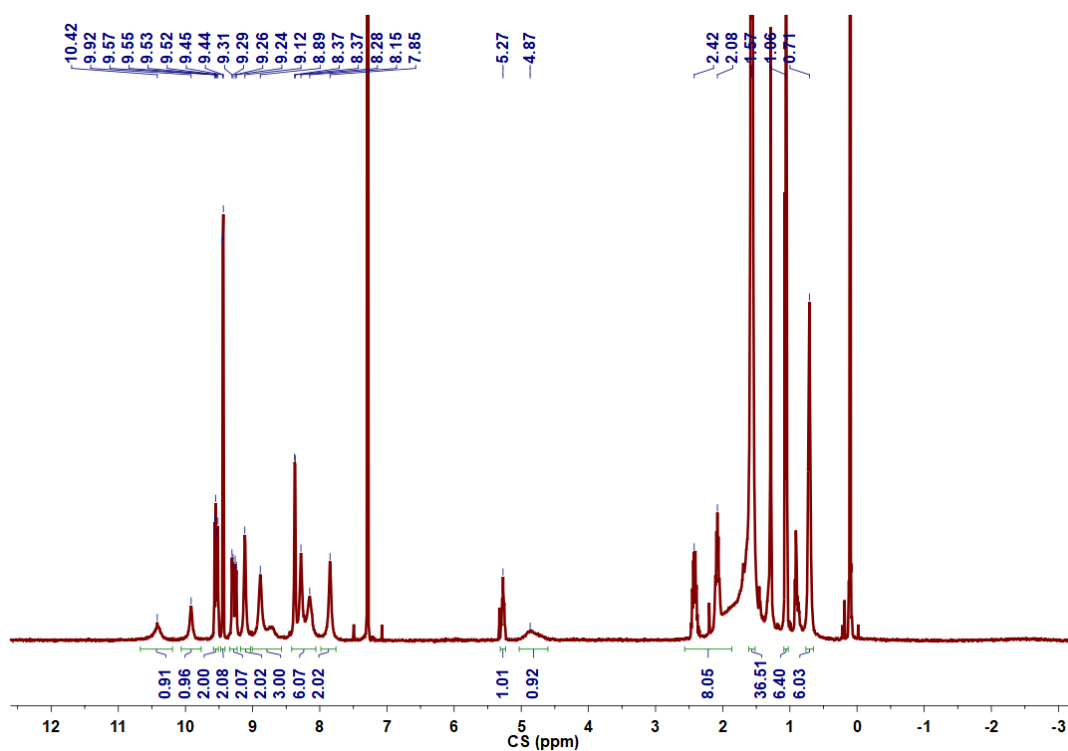

**Figure S17.**  $^1\text{H}$ -NMR spectra of **PDPP** with TFA in  $\text{CDCl}_3$  (500 MHz) at 298K

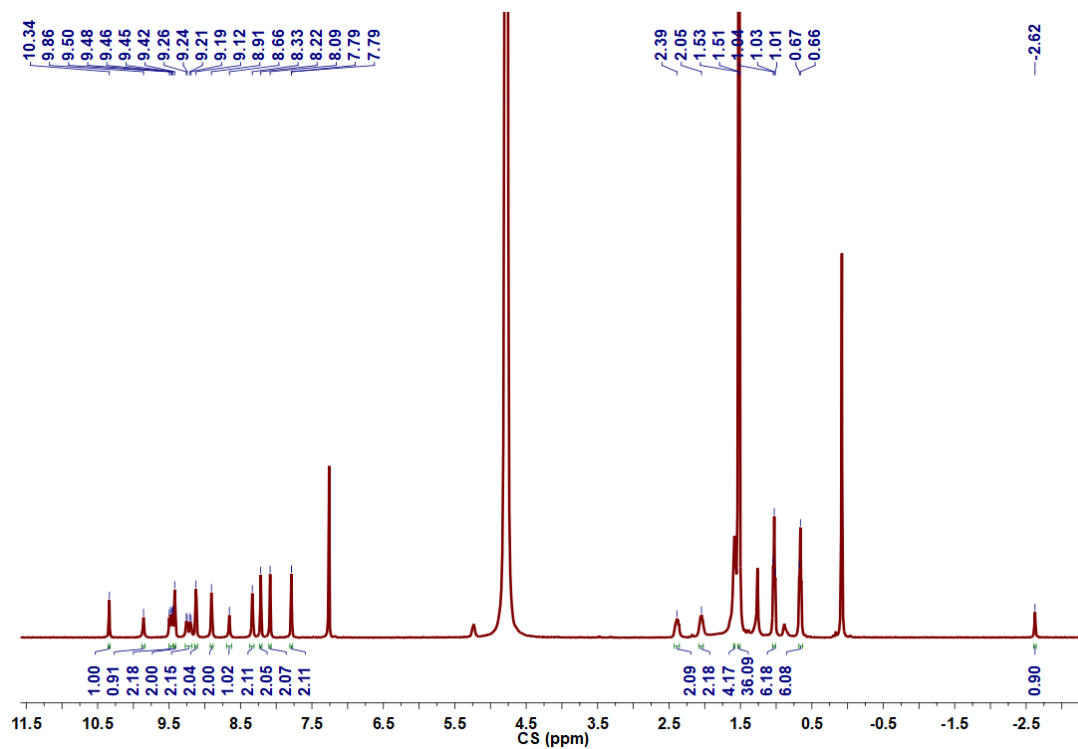

**Figure S18.**  $^1\text{H}$ -NMR spectra of **PDPP** with  $\text{D}_2\text{O}$  in  $\text{CDCl}_3$  (500 MHz) at 298K

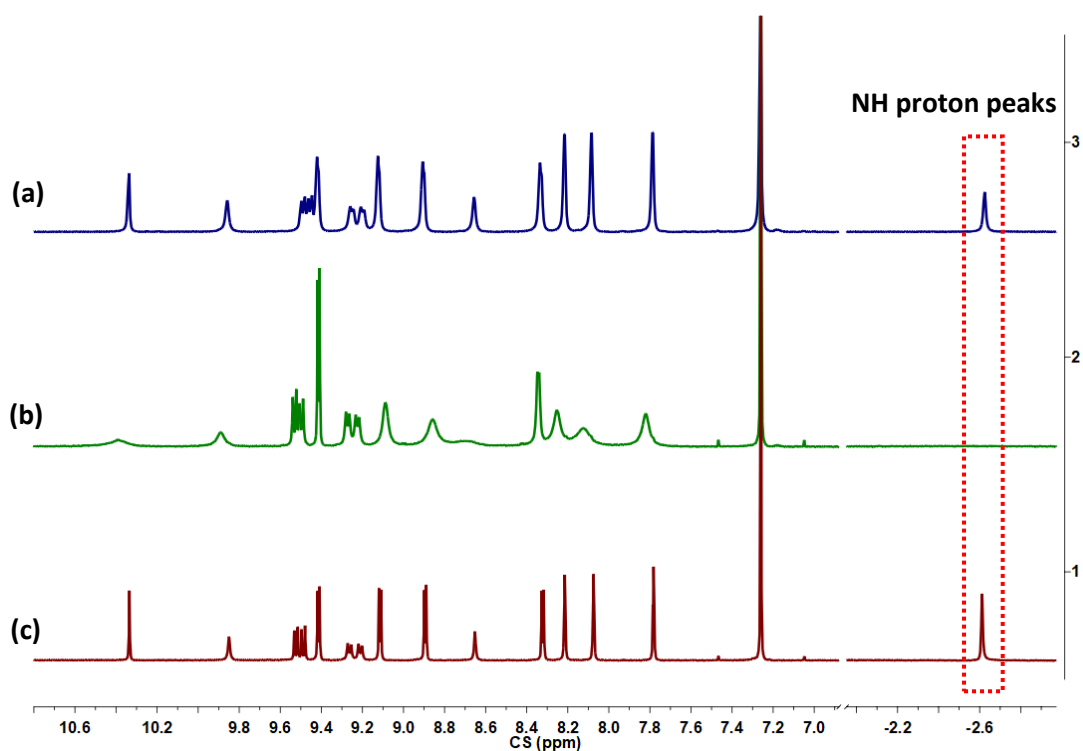

**Figure S19.** Partial  $^1\text{H}$ -NMR spectra of **PDPP** (c) with  $\text{D}_2\text{O}$  (a) and TFA (b) in  $\text{CDCl}_3$  (500 MHz) at 298K

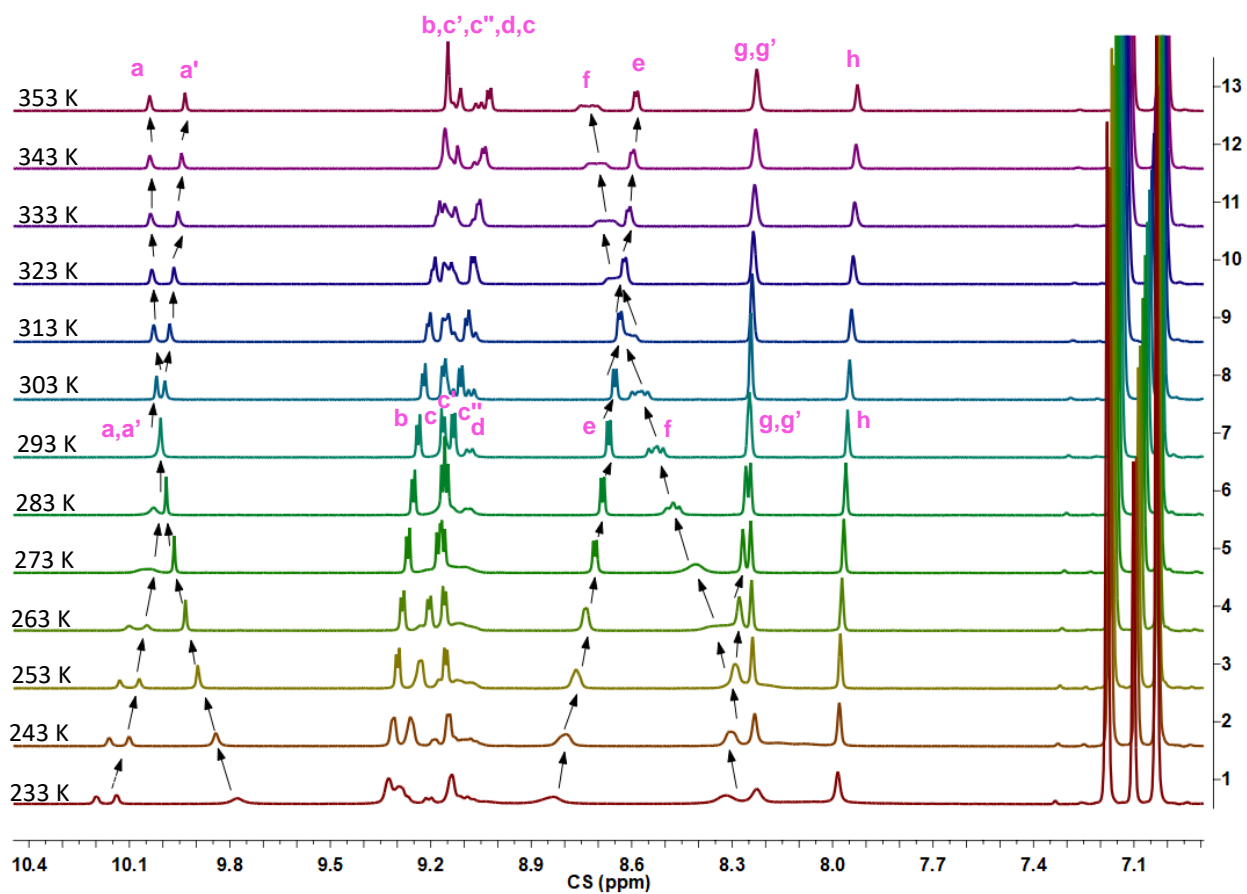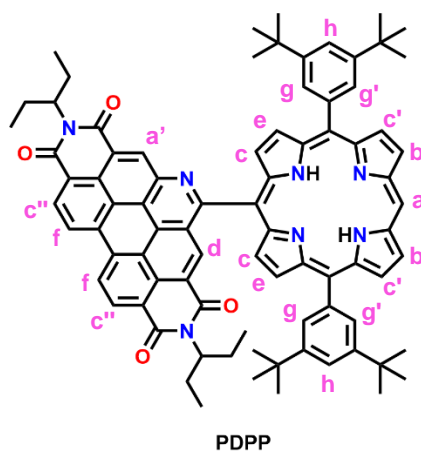

**Figure S20.** VT-<sup>1</sup>H NMR spectra of **PDPP** in Toluene-D<sub>8</sub> (500 MHz) (arrows indicate the change in peak positions with temperature)

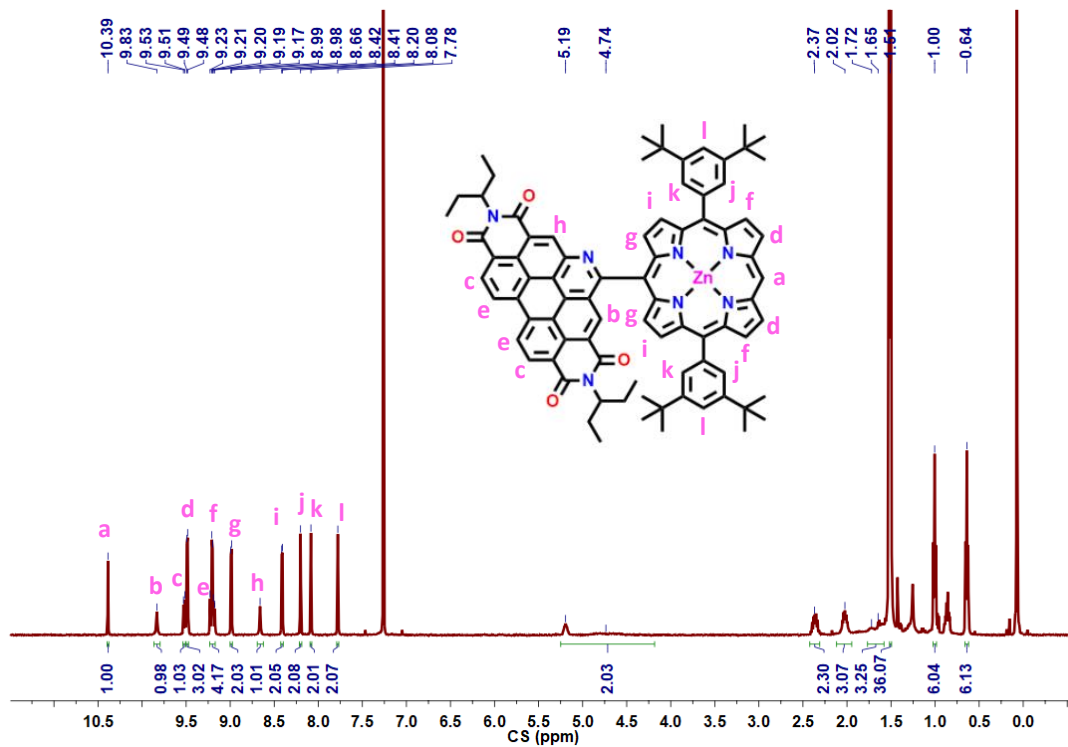

Figure S21.  $^1\text{H}$  NMR spectra of Zn-PDPP in  $\text{CDCl}_3$  (500 MHz) at 298K

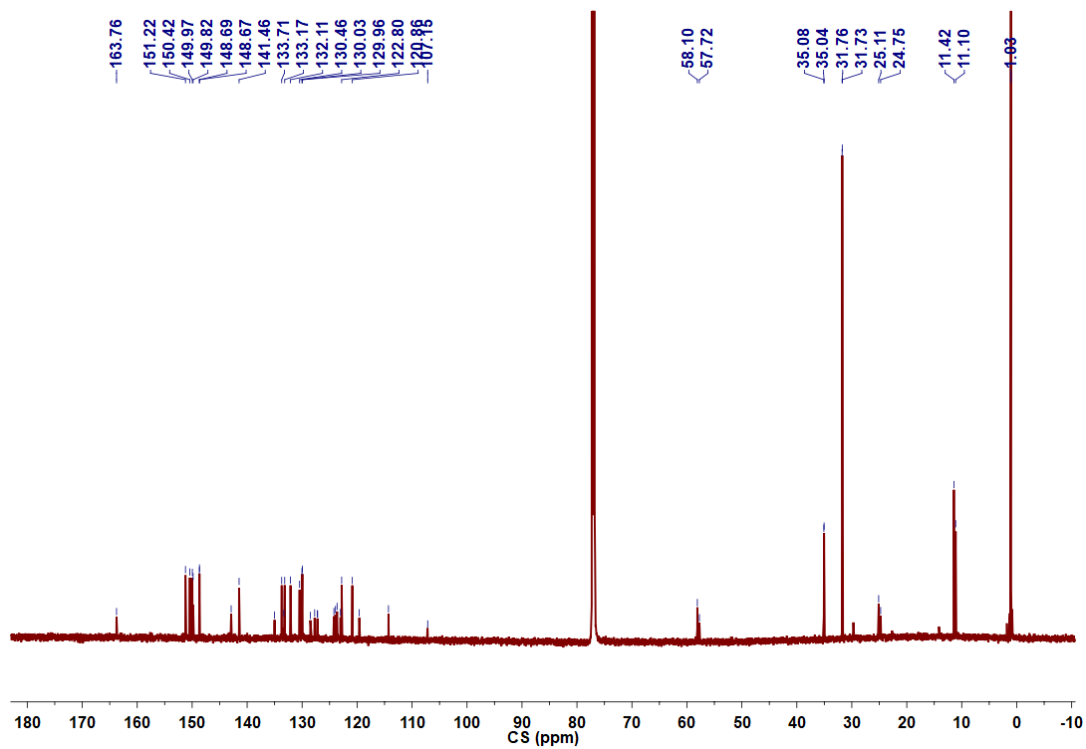

Figure S22.  $^{13}\text{C}\{^1\text{H}\}$  NMR spectra of Zn-PDPP in  $\text{CDCl}_3$  (175MHz) at 298K

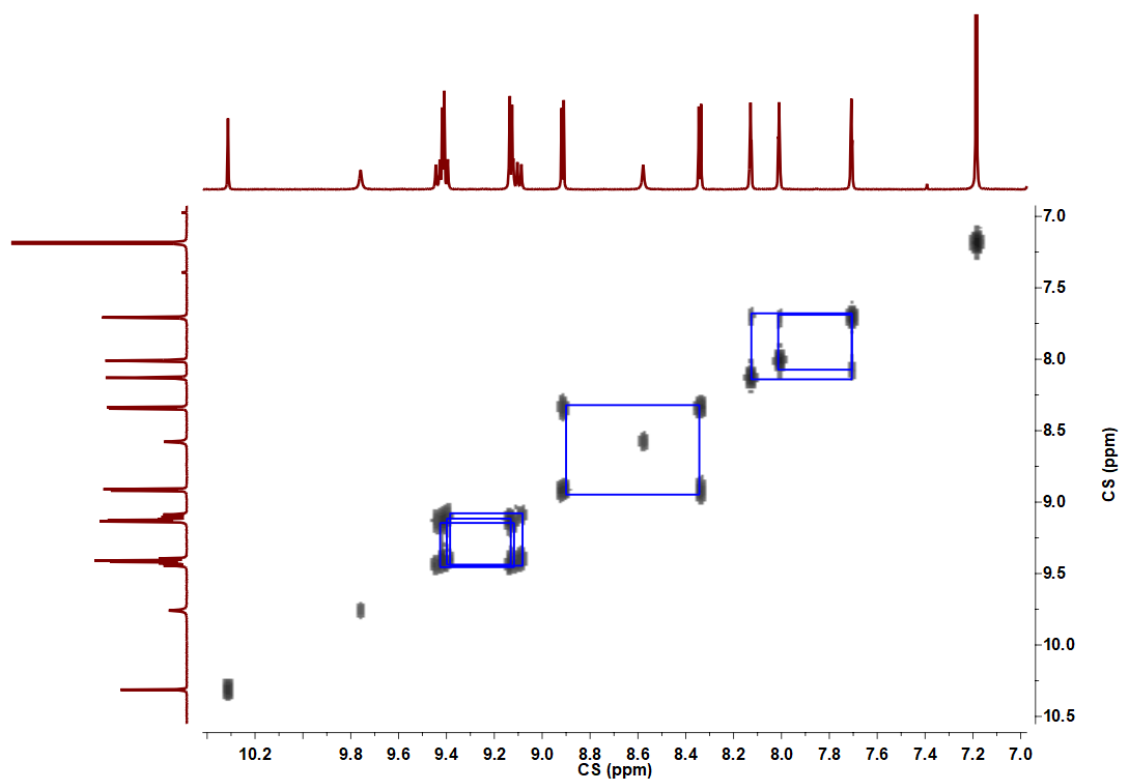

**Figure S23.**  $^1\text{H}$ - $^1\text{H}$  COSY NMR spectra of **Zn-PDPP** in  $\text{CDCl}_3$  (500 MHz) at 298K

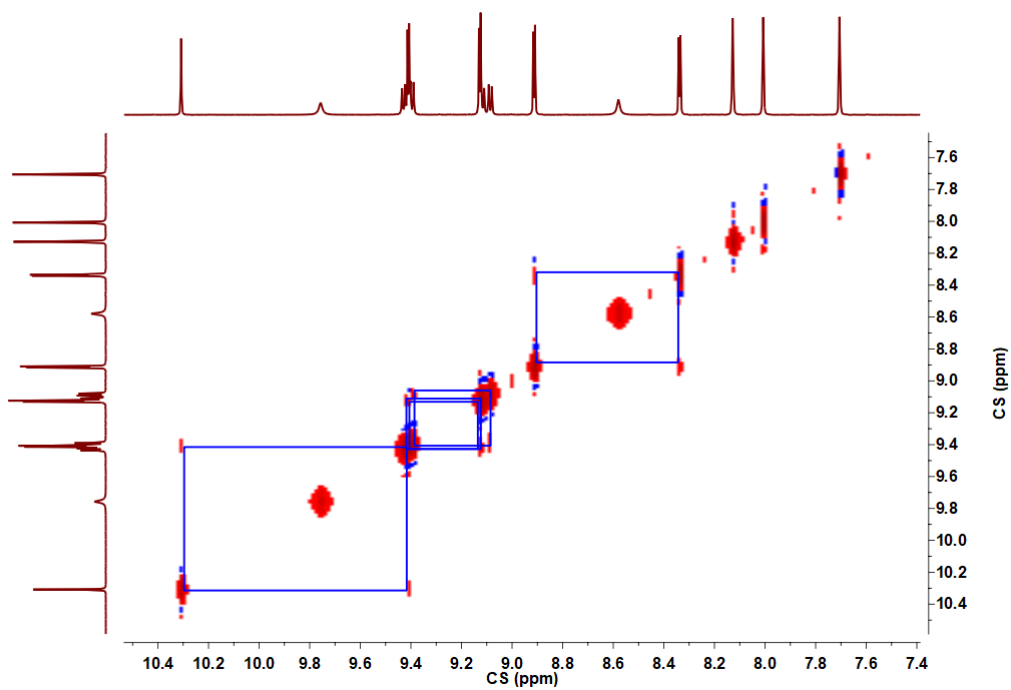

**Figure S24.**  $^1\text{H}$ - $^1\text{H}$  NOESY NMR spectra of **Zn-PDPP** in  $\text{CDCl}_3$  (500 MHz) at 298K

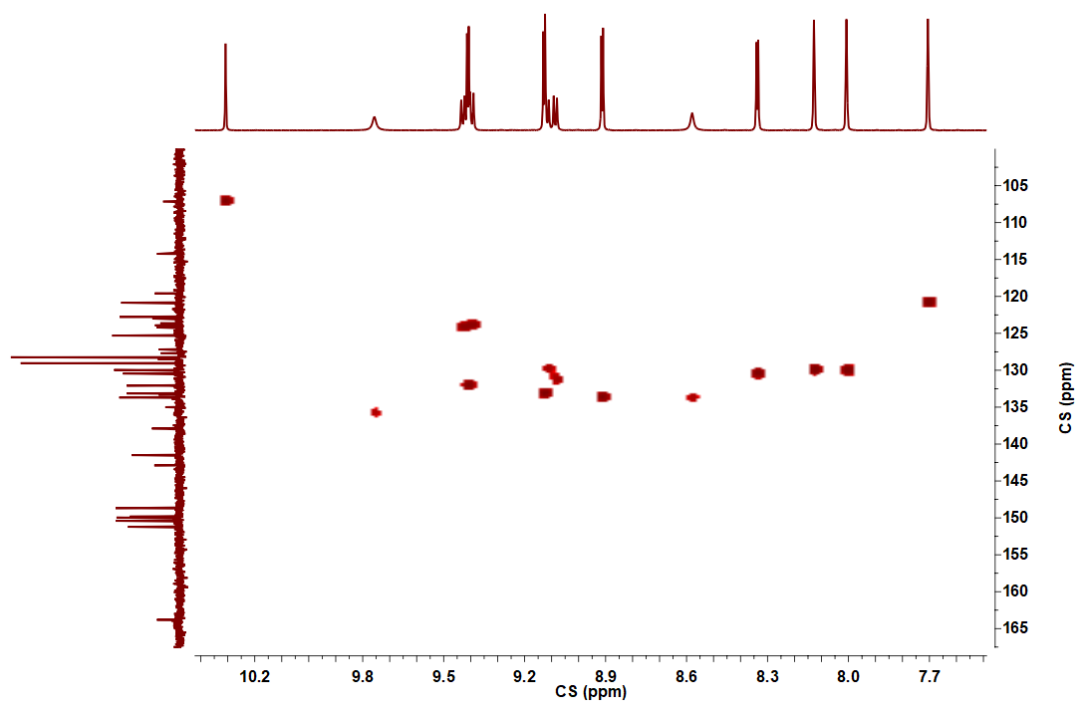

**Figure S25.**  $^1\text{H}$ - $^{13}\text{C}$  HSQC NMR spectra of **Zn-PDPP** in  $\text{CDCl}_3$  (500 MHz) at 298K

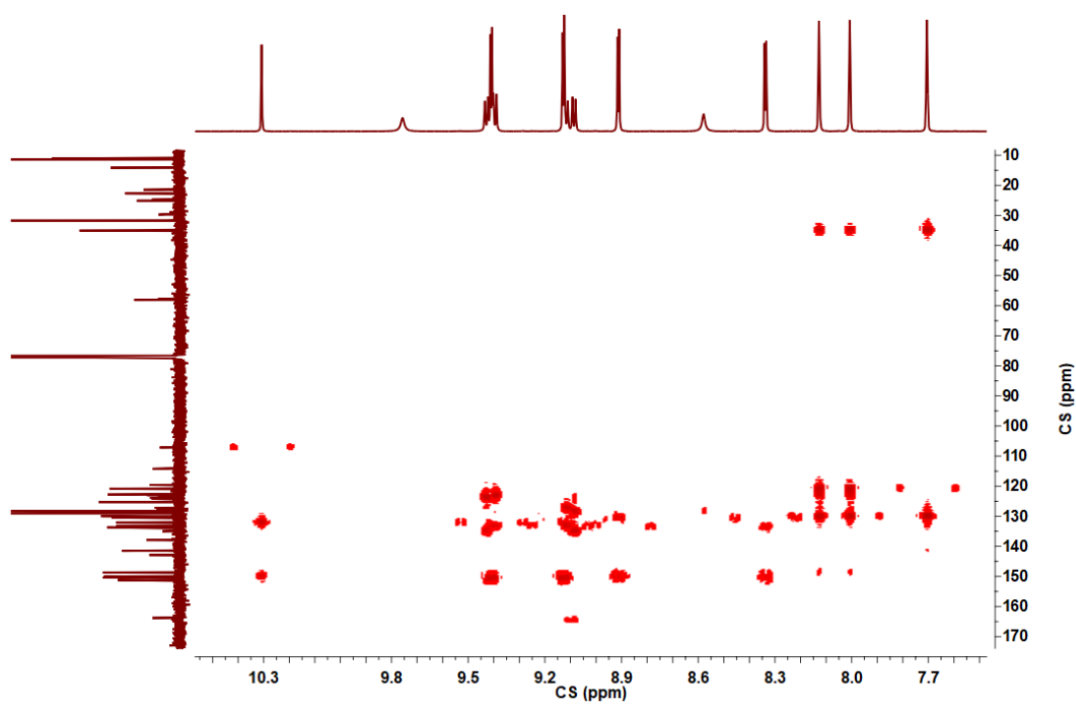

**Figure S26.**  $^1\text{H}$ - $^{13}\text{C}$  HMBC NMR spectra of **Zn-PDPP** in  $\text{CDCl}_3$  (500 MHz) at 298K

## Mass spectra

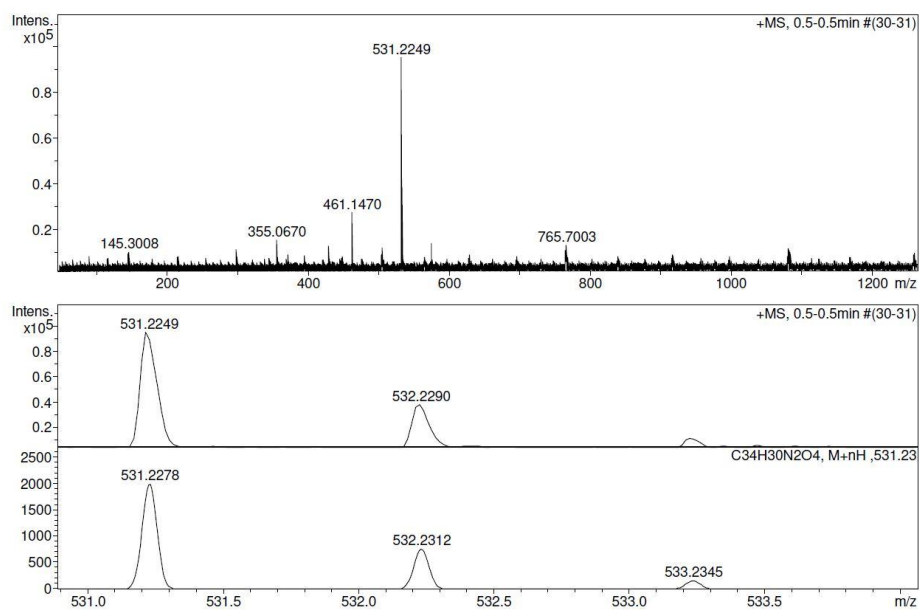

**Figure S27.** HRMS (ESI/Q-TOF) spectra of **PBI**

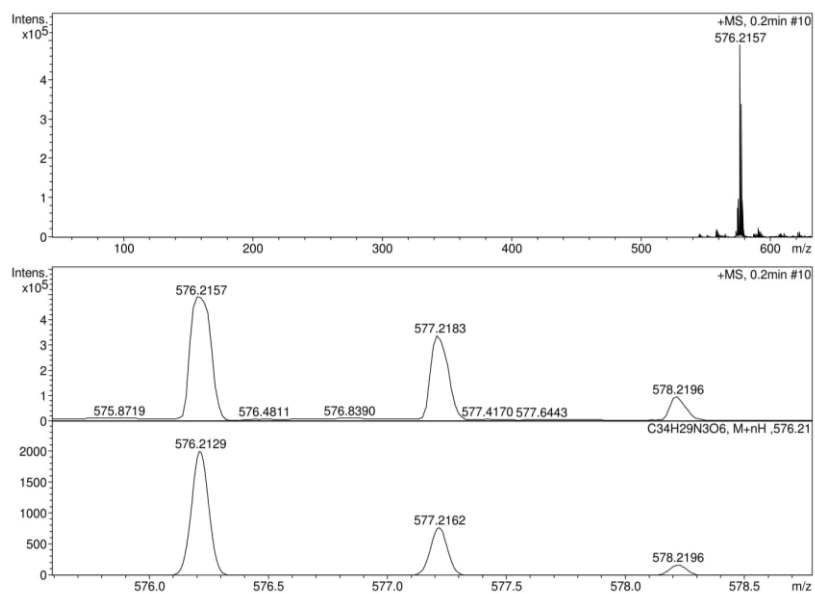

**Figure S28.** HRMS (ESI/Q-TOF) spectra of **PBNT**

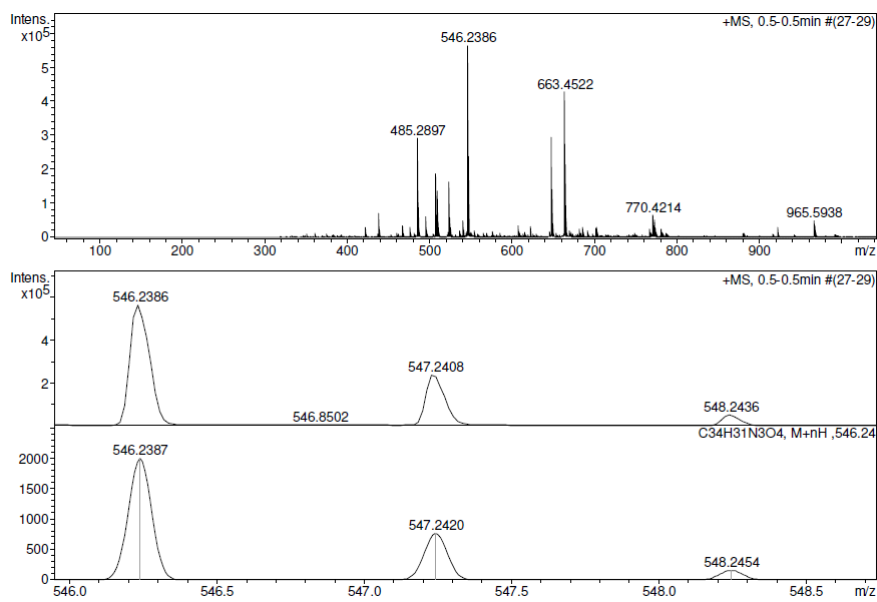

**Figure S29.** HRMS (ESI/Q-TOF) spectra of **PBN**

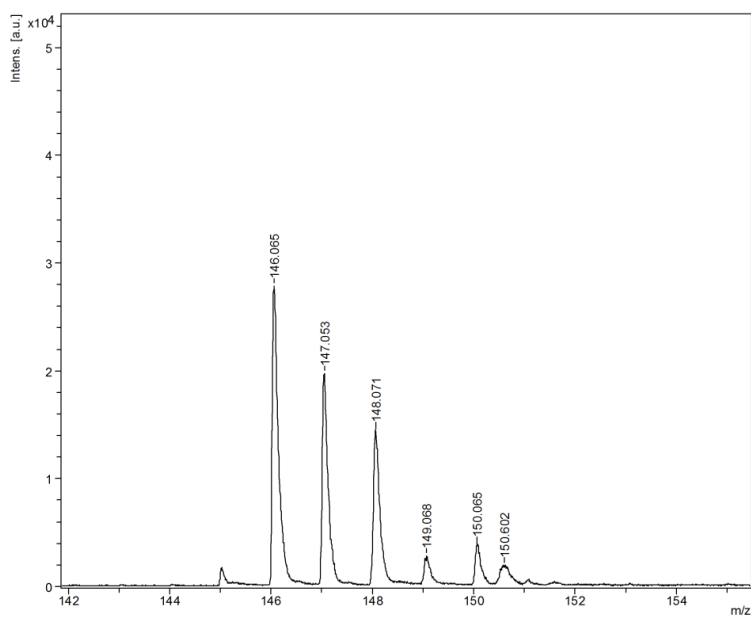

**Figure S30.** MALDI-TOF spectra of **DPM**



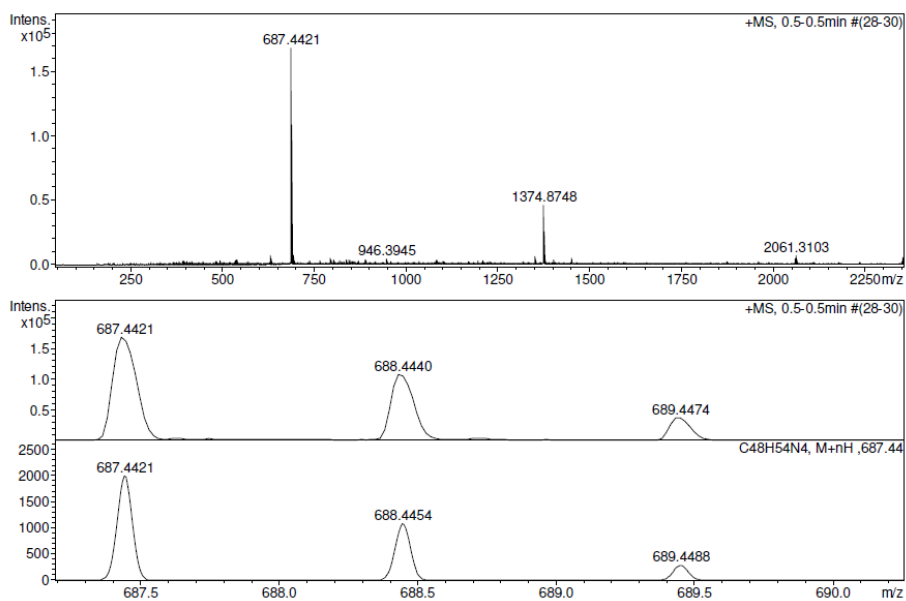

**Figure S31. HRMS (ESI/Q-TOF) spectra of PORP**

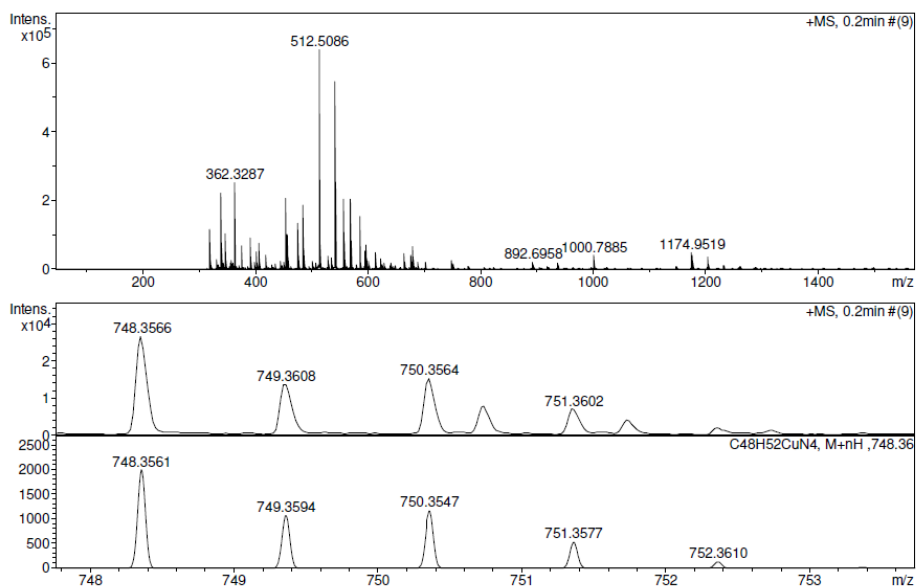

**Figure S32. HRMS (ESI/Q-TOF) spectra of Cu-PORP**

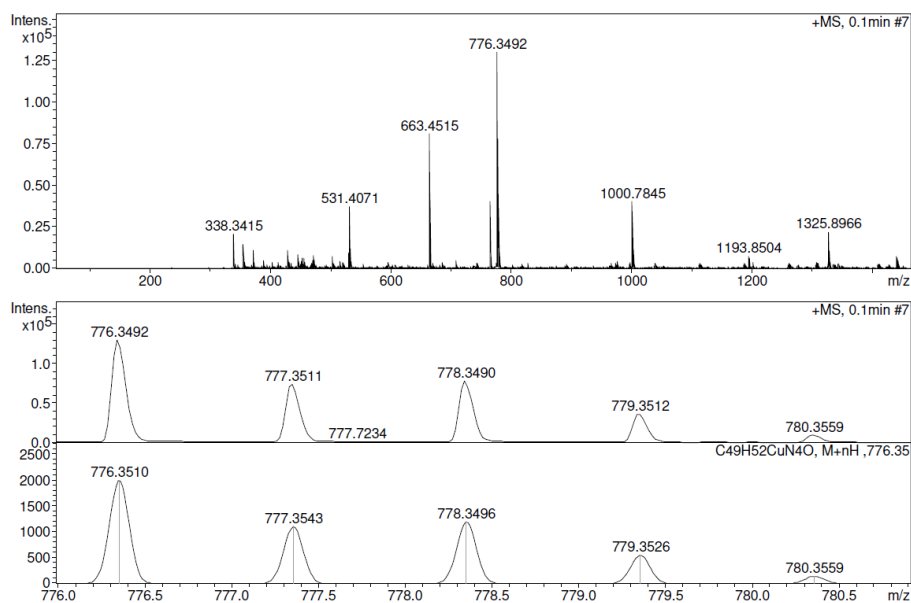

**Figure S33.** HRMS (ESI/Q-TOF) spectra of **CPHO**

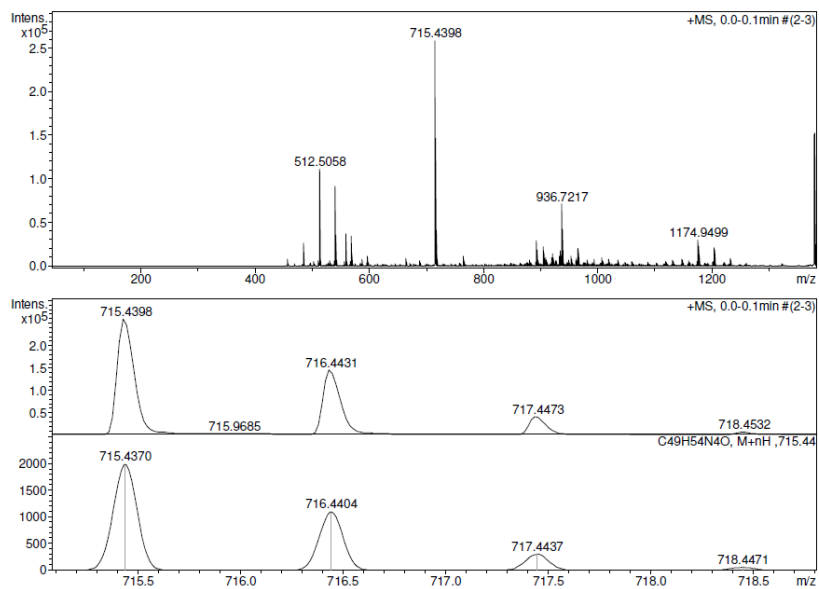

**Figure S34.** HRMS (ESI/Q-TOF) spectra of **PCHO**

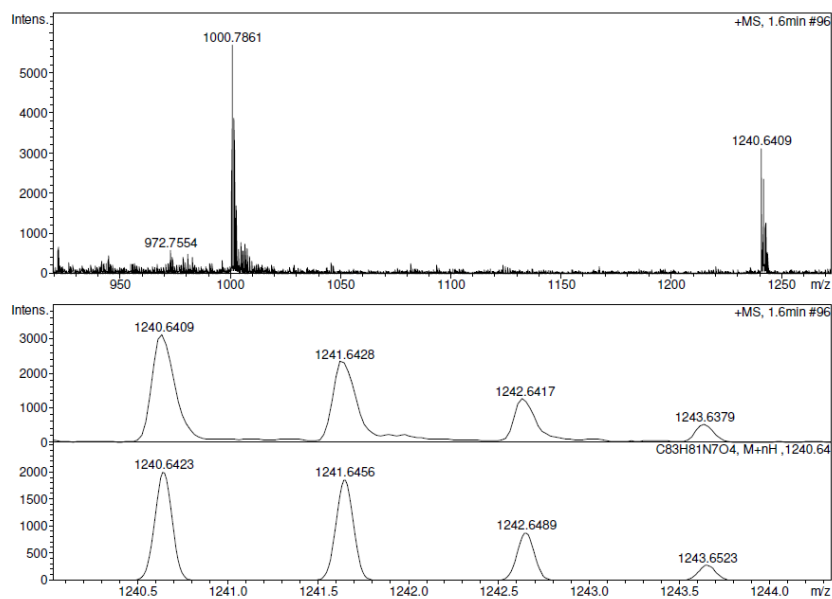

**Figure S35.** HRMS (APCI/Q-TOF) spectra of **PDPP**

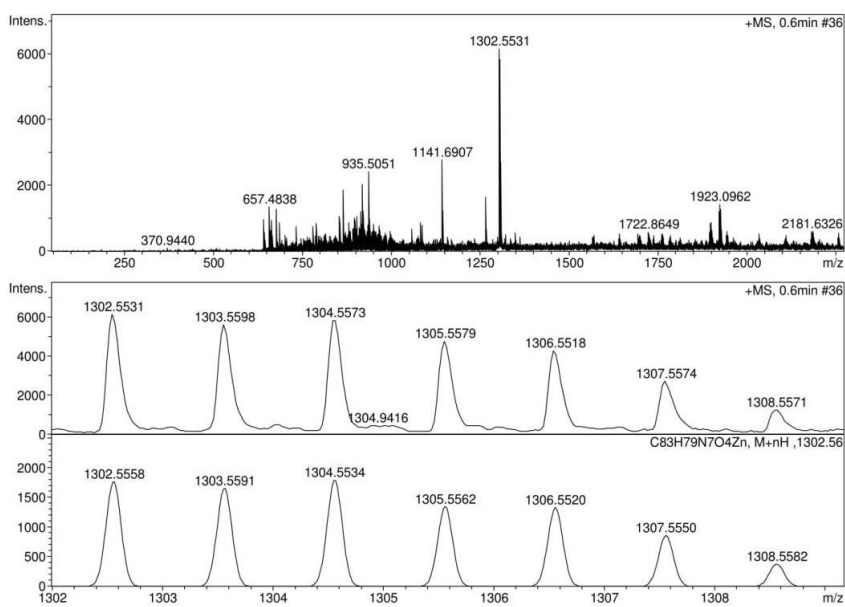

**Figure S36.** HRMS (APCI/Q-TOF) spectra of **Zn-PDPP**

## Fourier Transform-infrared spectra

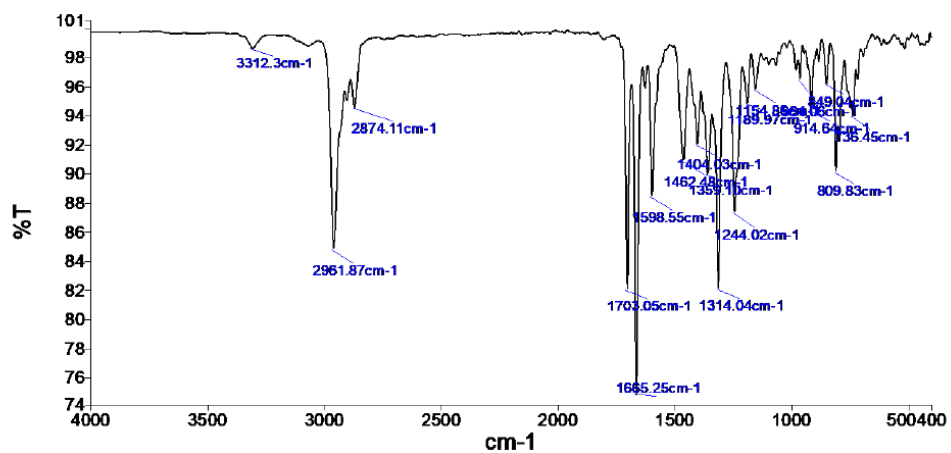

Figure S37. FT-IR spectra of the dyad PDPP

## Absorption and emission spectra

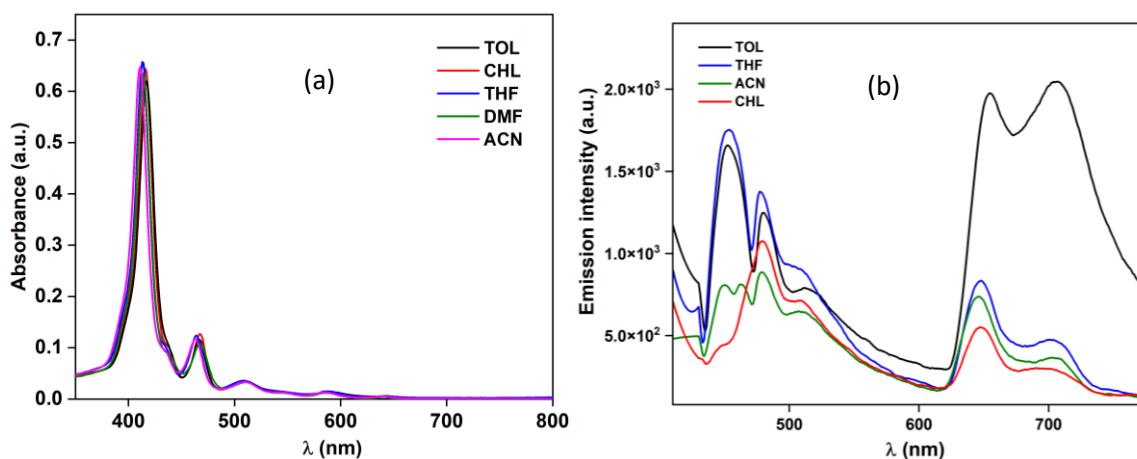

Figure S38. (a) Absorption spectra of PDPP in different solvents (b) Emission spectra of PDPP in different solvents when excited at 400 nm

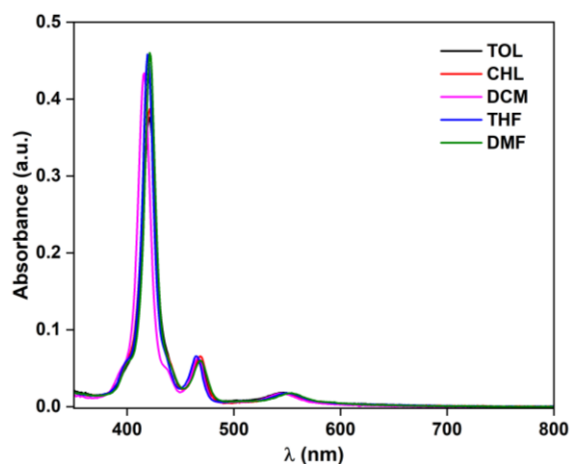

Figure S39. Absorption spectra of Zn-PDPP in different solvents

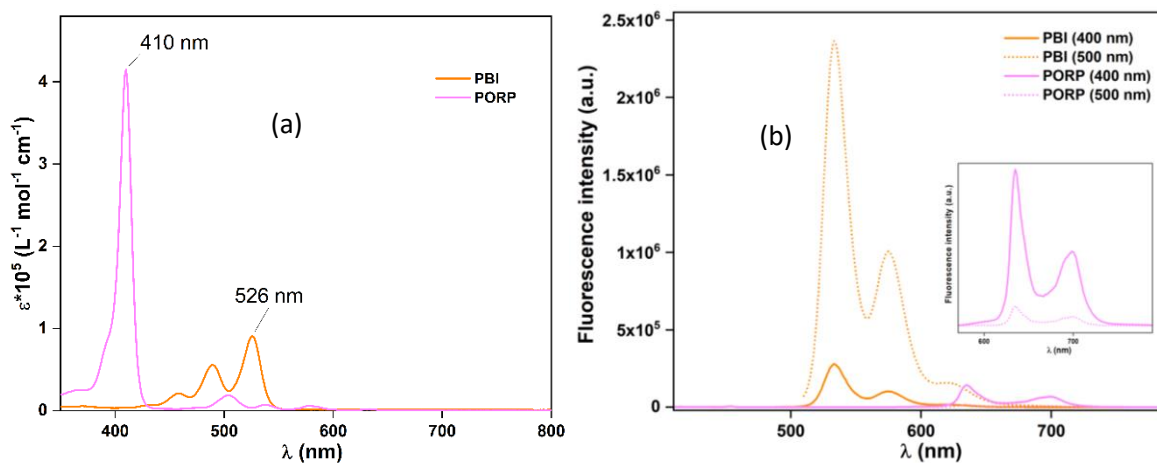

**Figure S40.** (a) Absorption and (b) emission spectra of **PORP** and **PBI** in toluene solution ( $10^{-6}\text{M}$ ) when excited at 400 nm and 500 nm

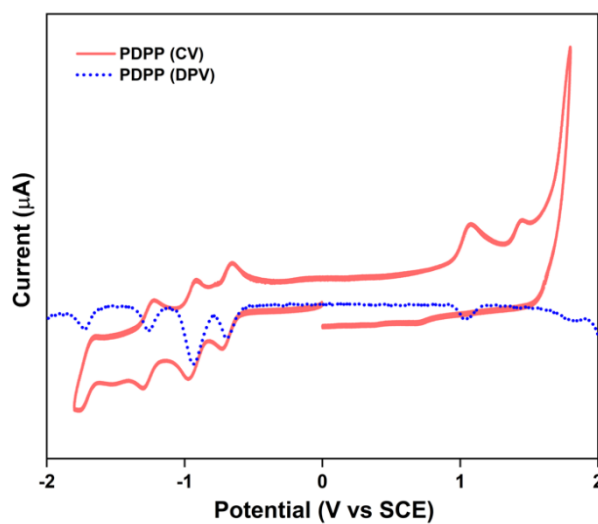

**Figure S41.** CV and DPV overlaid for **PDPP**

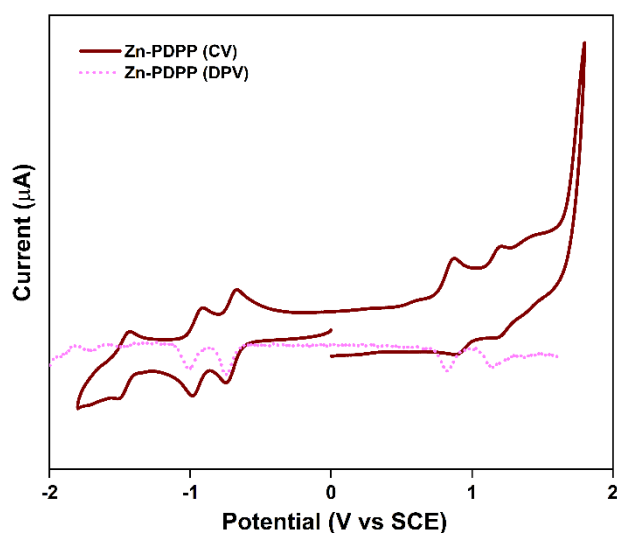

**Figure S42.** CV and DPV overlaid for **Zn-PDPP**

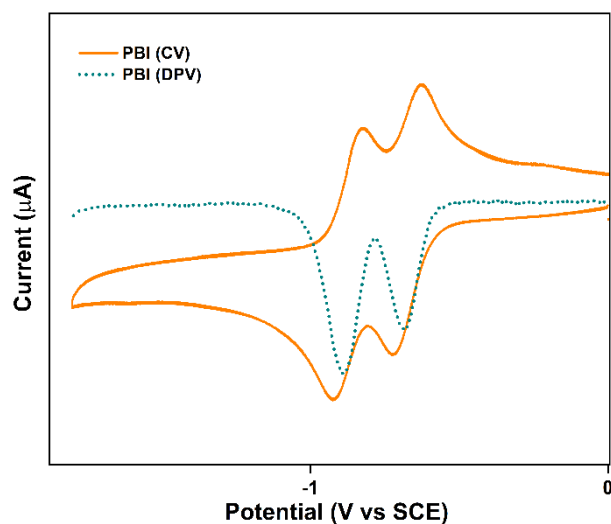

Figure S43. CV and DPV overlaid for **PBI**

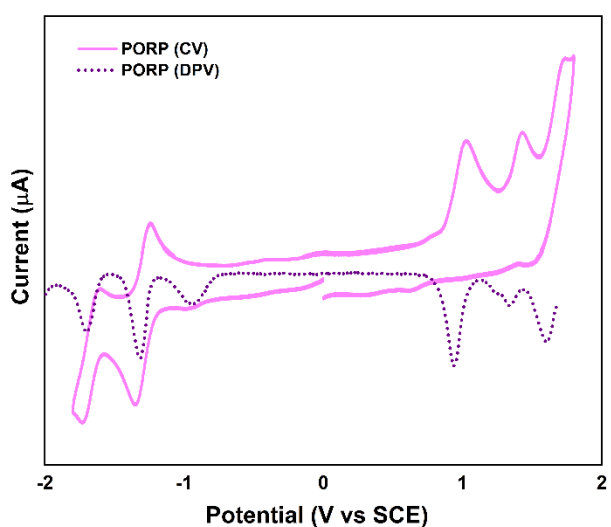

Figure S44. CV and DPV overlaid for **PORP**

Table S1. Table representing complete photophysical and electrochemical data for PBI, PORP, PDPP, and Zn-PDPP.

| Compound | $\lambda_{em}^{max}$ (nm)<br>400nm<br>excitation | $E_{opt}$<br>(eV) | $E_{1/2}^{red1}$<br>(V) | $E_{1/2}^{red2}$<br>(V) | $E_{1/2}^{red3}$<br>(V) | $E_{1/2}^{oxid1}$<br>(V) | $E_{1/2}^{oxid2}$<br>(V) | Band<br>gap<br>$E_g$<br>(eV) |
|----------|--------------------------------------------------|-------------------|-------------------------|-------------------------|-------------------------|--------------------------|--------------------------|------------------------------|
| PDPP     | 707                                              | 1.84              | -0.69                   | -0.94                   | -1.26                   | +1.03                    | +1.32                    | 1.72                         |
| Zn-PDPP  | -                                                | 1.74              | -0.75                   | -1.01                   | -1.47                   | +0.82                    | +1.15                    | 1.57                         |
| PBI      | 533                                              | 2.29              | -0.69                   | -0.89                   | -                       | -                        | -                        | 2.3                          |
| PORP     | 635                                              | 1.92              | -0.94                   | -1.32                   | -1.70                   | +0.94                    | +1.61                    | 1.88                         |

$E_{1/2}^{red1}$ ,  $E_{1/2}^{red2}$ , and  $E_{1/2}^{red3}$  represent the first, second, and third reduction potentials, respectively.

$E_{1/2}^{oxid1}$ , and  $E_{1/2}^{oxid2}$  represent the first and second oxidation potentials, respectively.

## Density functional theory (DFT) calculations

### DFT Studies for PDPP

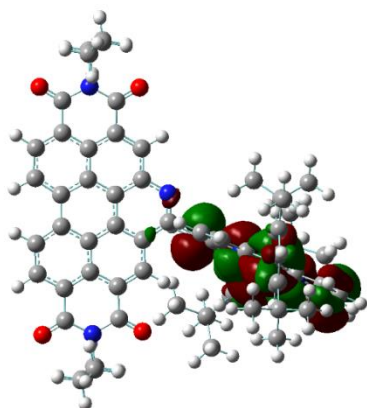

**HOMO(PDPP)**

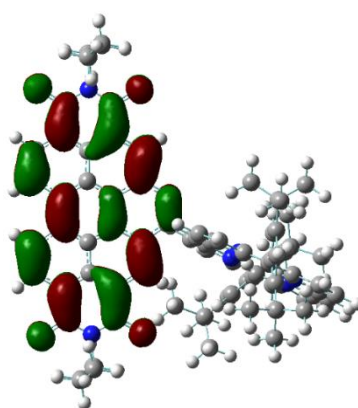

**LUMO(PDPP)**

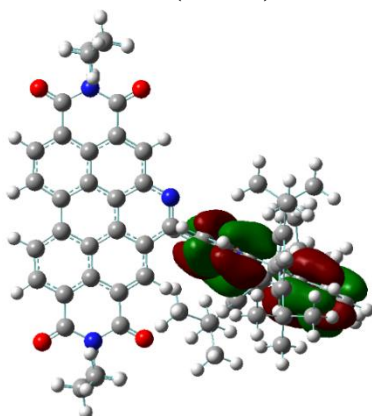

**HOMO-1(PDPP)**

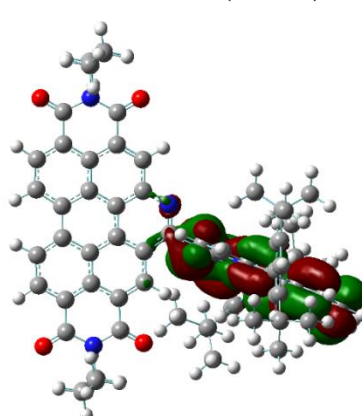

**LUMO+1(PDPP)**

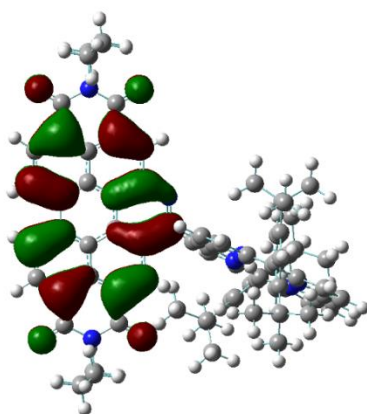

**HOMO-2(PDPP)**

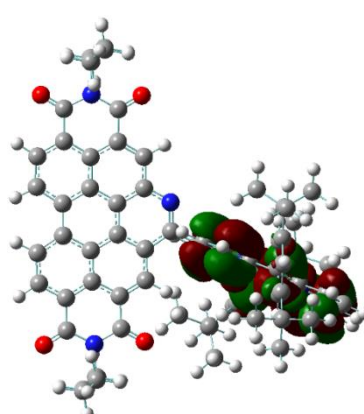

**LUMO+2(PDPP)**

## DFT Studies for Zn-PDPP

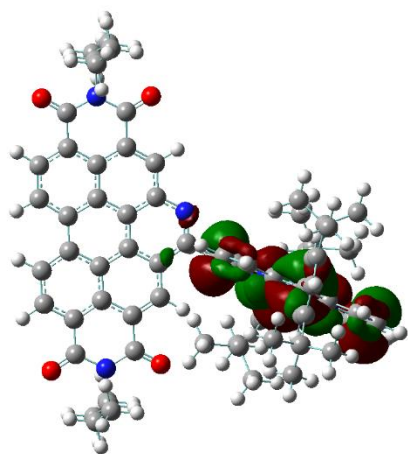

**HOMO(Zn-PDPP)**

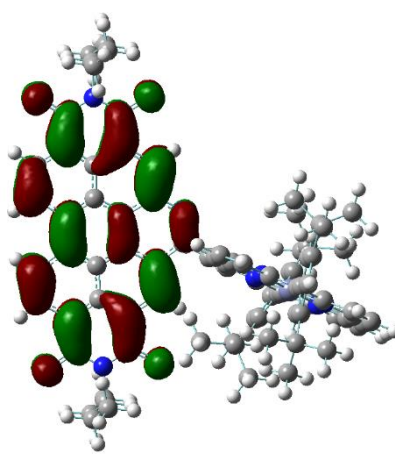

**LUMO(Zn-PDPP)**

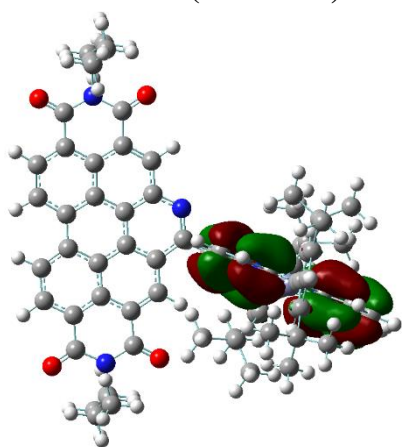

**HOMO-1(Zn-PDPP)**

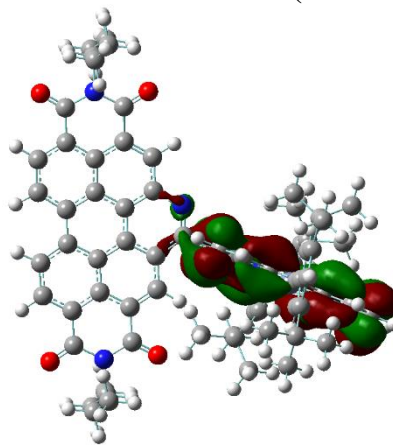

**LUMO+1(Zn-PDPP)**

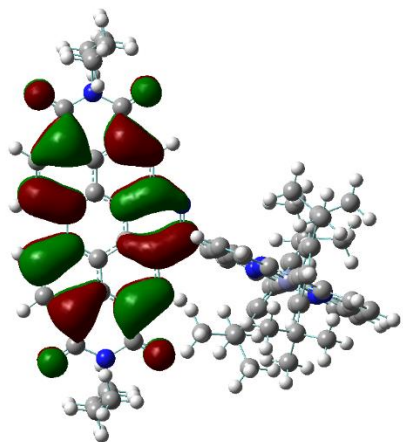

**HOMO-2(Zn-PDPP)**

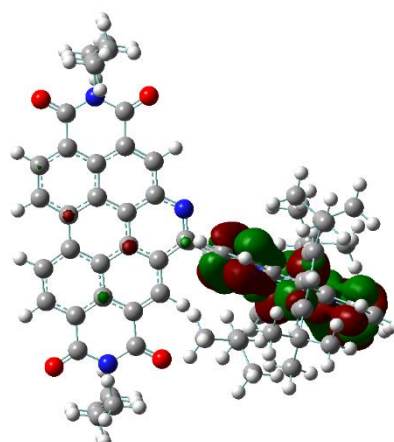

**LUMO+2(Zn-PDPP)**



**Single Crystal X-ray Diffraction Data:**

| <b>Table S2. Crystal data and structure refinement for PDPP-triflate, and PDPP</b> |                                                                                              |                                                                   |
|------------------------------------------------------------------------------------|----------------------------------------------------------------------------------------------|-------------------------------------------------------------------|
| <b>Identification code</b>                                                         | <b>PDPP-triflate</b>                                                                         | <b>PDPP</b>                                                       |
| <b>CCDC No.</b>                                                                    | 2255971                                                                                      | 2255973                                                           |
| <b>Empirical formula</b>                                                           | C <sub>85</sub> H <sub>83</sub> F <sub>6</sub> N <sub>7</sub> O <sub>10</sub> S <sub>2</sub> | C <sub>83</sub> H <sub>81</sub> N <sub>7</sub> O <sub>4</sub>     |
| <b>Formula weight</b>                                                              | 1540.70                                                                                      | 1240.54                                                           |
| <b>Temperature/K</b>                                                               | 100(2)                                                                                       | 100 (2)                                                           |
| <b>Crystal system</b>                                                              | triclinic                                                                                    | triclinic                                                         |
| <b>Space group</b>                                                                 | P-1                                                                                          | P-1                                                               |
| <b>a/Å</b>                                                                         | 9.458(3)                                                                                     | 19.447(11)                                                        |
| <b>b/Å</b>                                                                         | 16.868(5)                                                                                    | 20.612(13)                                                        |
| <b>c/Å</b>                                                                         | 24.791(6)                                                                                    | 21.648(16)                                                        |
| <b>α/°</b>                                                                         | 77.903(11)                                                                                   | 84.15(3)                                                          |
| <b>β/°</b>                                                                         | 80.287(11)                                                                                   | 88.97(4)                                                          |
| <b>γ/°</b>                                                                         | 85.773(12)                                                                                   | 71.62(3)                                                          |
| <b>Volume/Å<sup>3</sup></b>                                                        | 3809.0(18)                                                                                   | 8191(9)                                                           |
| <b>Z</b>                                                                           | 2                                                                                            | 4                                                                 |
| <b>ρ<sub>calc</sub>/cm<sup>3</sup></b>                                             | 1.343                                                                                        | 1.006                                                             |
| <b>μ/mm<sup>-1</sup></b>                                                           | 0.150                                                                                        | 0.062                                                             |
| <b>F(000)</b>                                                                      | 1616.0                                                                                       | 2640.0                                                            |
| <b>Crystal size/mm<sup>3</sup></b>                                                 | 0.17 × 0.08 × 0.06                                                                           | 0.14 × 0.08 × 0.04                                                |
| <b>Radiation</b>                                                                   | MoKα (λ = 0.71073)                                                                           | MoKα (λ = 0.71073)                                                |
| <b>2θ range for data collection/°</b>                                              | 3.784 to 52.044                                                                              | 4.07 to 50.7                                                      |
| <b>Index ranges</b>                                                                | -11 ≤ h ≤ 11, -20 ≤ k ≤ 20,<br>-30 ≤ l ≤ 30                                                  | -23 ≤ h ≤ 23, -24 ≤ k ≤ 24, -<br>26 ≤ l ≤ 26                      |
| <b>Reflections collected</b>                                                       | 126468                                                                                       | 274210                                                            |
| <b>Independent reflections</b>                                                     | 15014 [R <sub>int</sub> = 0.4030,<br>R <sub>sigma</sub> = 0.3283]                            | 29972 [R <sub>int</sub> = 0.7203,<br>R <sub>sigma</sub> = 0.4416] |
| <b>Data/restraints/parameters</b>                                                  | 15014/187/1037                                                                               | 29972/1981/1886                                                   |
| <b>Goodness-of-fit on F<sup>2</sup></b>                                            | 1.021                                                                                        | 0.900                                                             |
| <b>Final R indexes [I &gt;= 2σ (I)]</b>                                            | R <sub>1</sub> = 0.1146, wR <sub>2</sub> = 0.2621                                            | R <sub>1</sub> = 0.1213, wR <sub>2</sub> = 0.2901                 |
| <b>Final R indexes [all data]</b>                                                  | R <sub>1</sub> = 0.3382, wR <sub>2</sub> = 0.3737                                            | R <sub>1</sub> = 0.3742, wR <sub>2</sub> = 0.4538                 |
| <b>Largest diff. peak/hole / e Å<sup>-3</sup></b>                                  | 1.08/-0.38                                                                                   | 0.54/-0.49                                                        |

**Crystallographic images:**

(a)

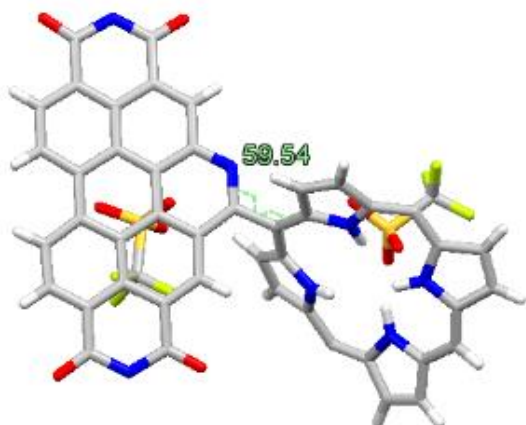

(b)

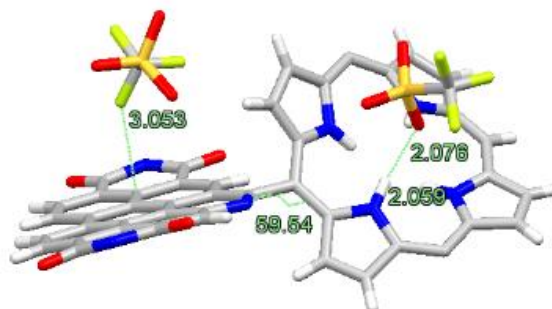

**Figure S45.** Crystal images for **PDPP-triflate** along different axes (a) and (b).

(a)

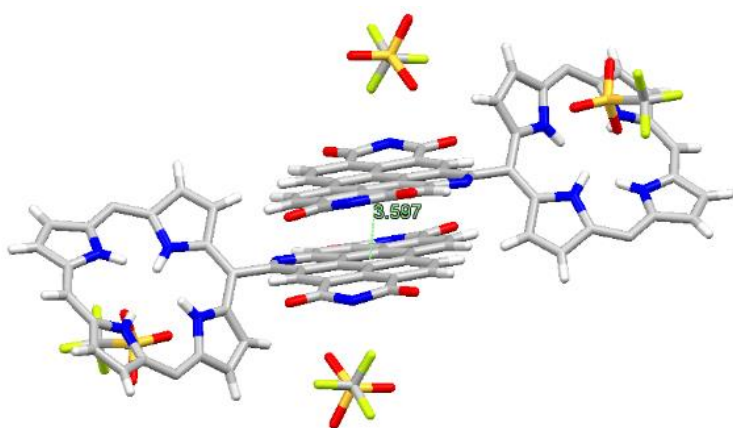

(b)

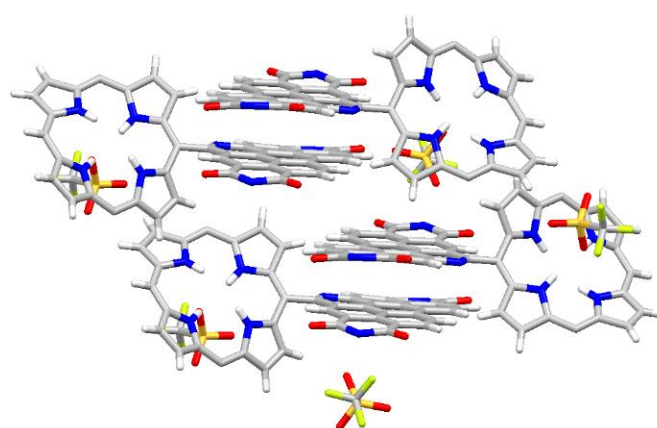

(c)

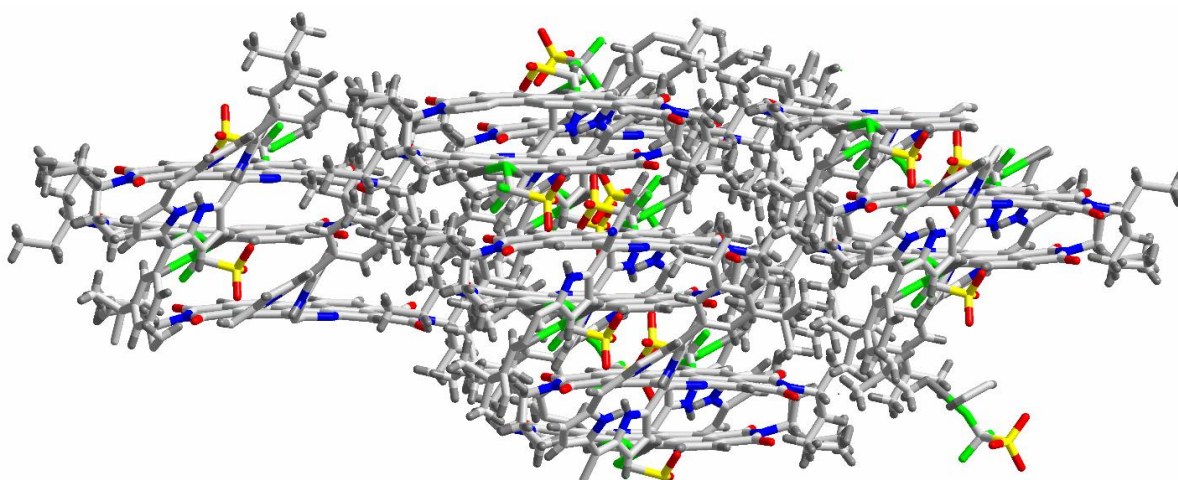

**Figure S46.** Crystal packing diagram for **PDPP-triflate** through different axes (a), (b), (c).

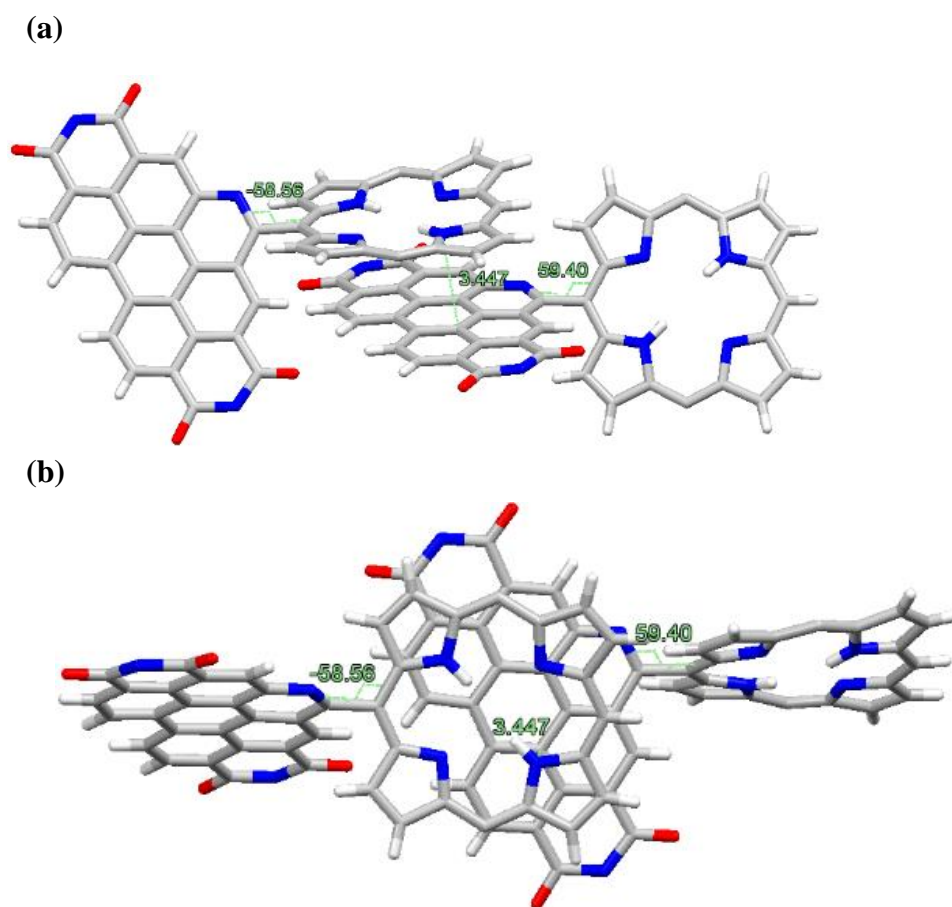

**Figure S47.** Crystal images for **PDPP** along different axes (a) and (b).

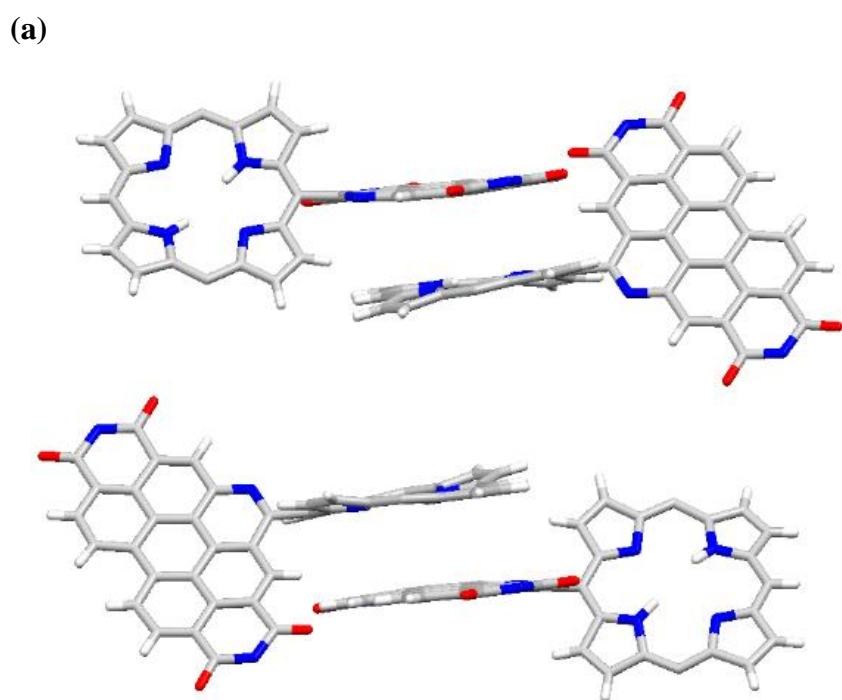

(b)

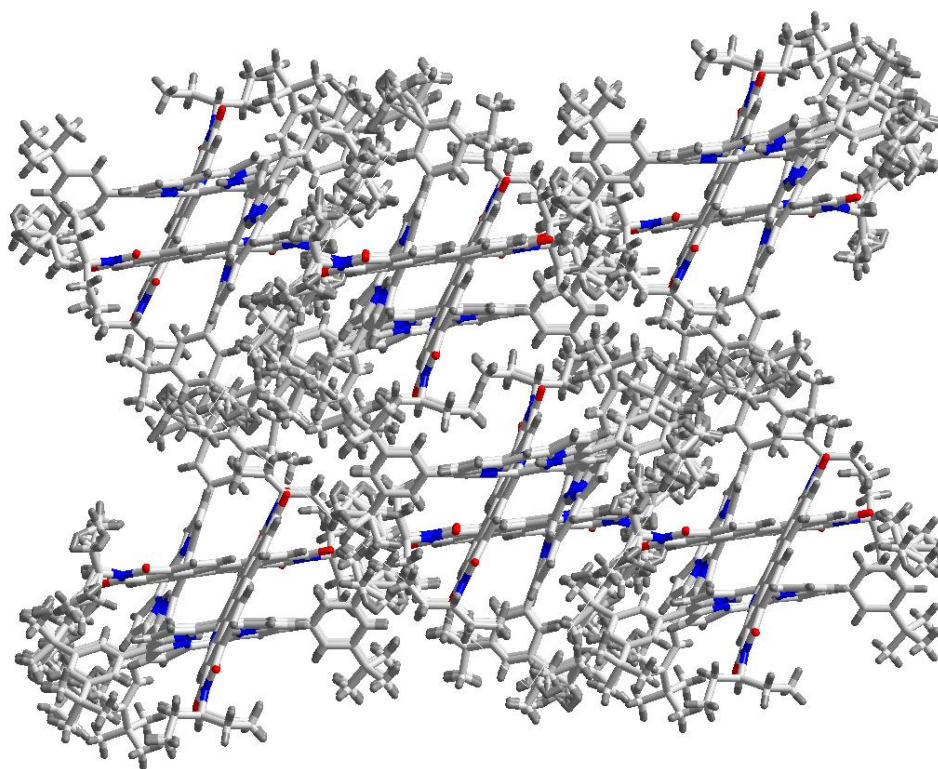

(c)

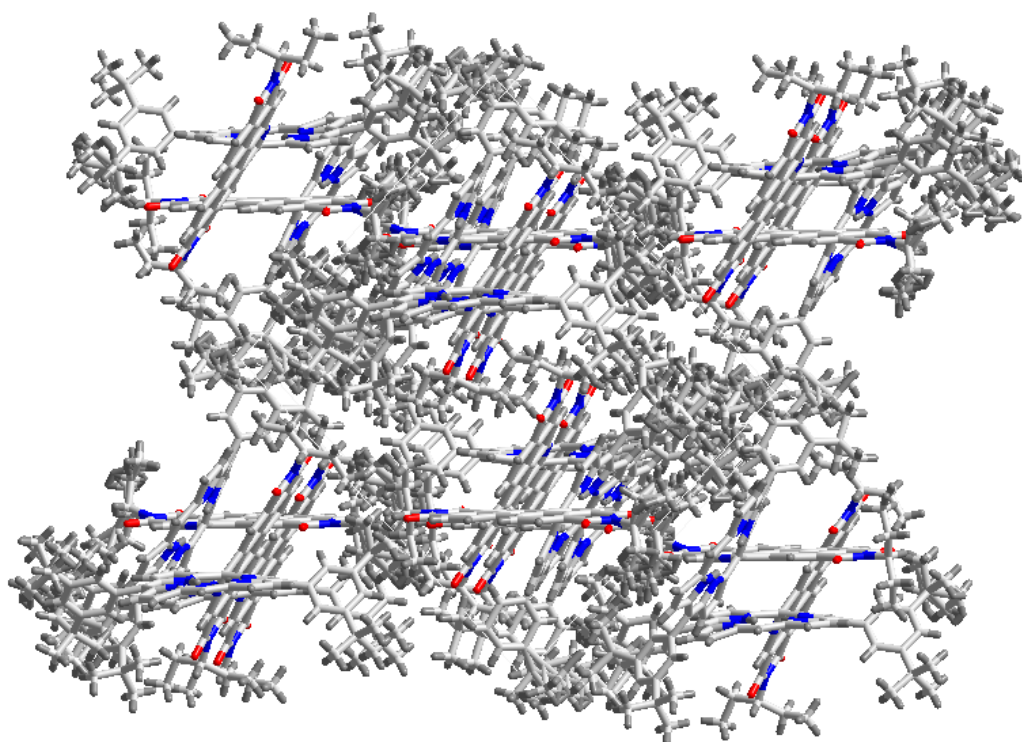

**Figure S48.** Crystal packing diagram for **PDPP** through different axes (a), (b), (c).



### Mechanistic details for the formation of PDPP in a single step:

In the TFSA-catalyzed PSR with the 10,20-Bis(3,5-ditertbutylphenyl)-porphyrin-5-carboxaldehyde substrate, no intermediate was observed. The presence of strong oxidizing acid  $\text{CF}_3\text{SO}_3\text{H}$  (TFSA) leads to the formation of N-oxide iminium ion which activates the imine for cyclization under heating conditions ( $\sim 100^\circ\text{C}$ ) following a disrotatory mechanism and further aromatization leads to the product **PDPP**.

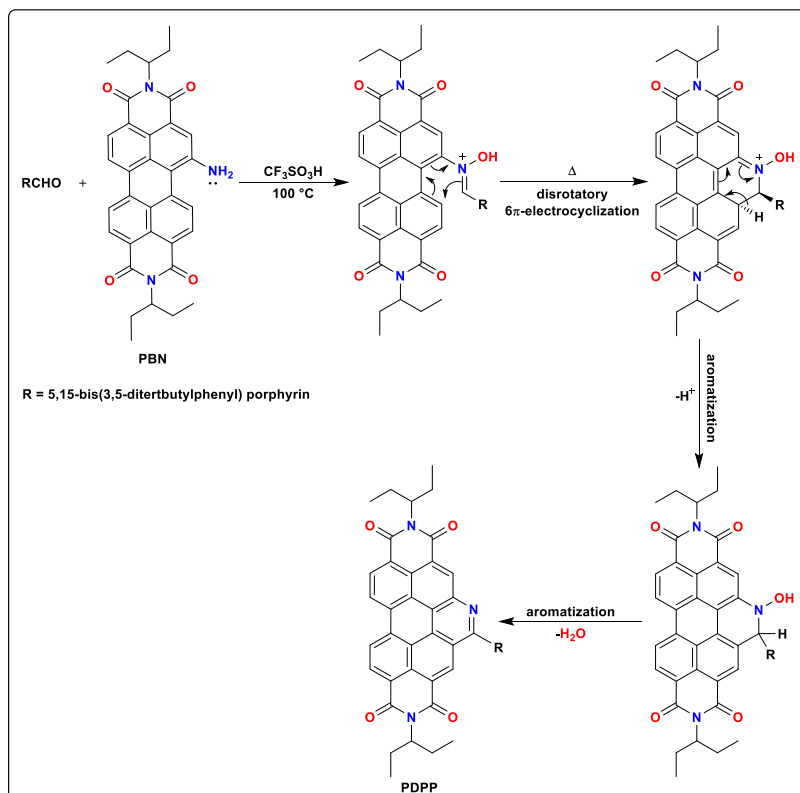

**Figure S49.** A plausible mechanism for the formation of **PDPP** using triflic acid with porphyrin substrate.

**Table S3.** Photovoltaic parameters for the **PDPP**:PC<sub>71</sub>BM based OSCs with different weight ratios of **PDPP** and PC<sub>71</sub>BM cast from chloroform solvent

| Weight ratio | Jsc (mA/cm <sup>2</sup> ) | Voc (V)     | FF          | PCE (%)     |
|--------------|---------------------------|-------------|-------------|-------------|
| 1:0.2        | 8.31                      | 0.98        | 0.48        | 3.91        |
| 1:0.6        | 9.15                      | 0.97        | 0.50        | 4.44        |
| 1:1.0        | 9.73                      | 0.98        | 0.51        | 4.86        |
| <b>1:1.4</b> | <b>10.28</b>              | <b>0.98</b> | <b>0.53</b> | <b>5.34</b> |
| 1:1.6        | 9.63                      | 0.97        | 0.50        | 4.67        |

**Table S4.** Photovoltaic parameters for the **Zn-PDPP**: PC<sub>71</sub>BM based OSCs with different weight ratios of **Zn-PDPP** and PC<sub>71</sub>BM cast from chloroform solvent

| Weight ratio | J <sub>sc</sub> (mA/cm <sup>2</sup> ) | V <sub>oc</sub> (V) | FF          | PCE (%)     |
|--------------|---------------------------------------|---------------------|-------------|-------------|
| 1:0.2        | 10.18                                 | 0.87                | 0.53        | 4.69        |
| 1:0.6        | 11.17                                 | 0.88                | 0.56        | 5.50        |
| 1:1.0        | 13.43                                 | 0.86                | 0.58        | 6.70        |
| <b>1:1.4</b> | <b>14.19</b>                          | <b>0.85</b>         | <b>0.61</b> | <b>7.36</b> |
| 1:1.6        | 13.54                                 | 0.87                | 0.58        | 6.83        |

**Table S5.** Cartesian coordinates of the single-crystal obtained for compound **PDPP-triflate**.

| Number | Label | X          | Y           | Z           |
|--------|-------|------------|-------------|-------------|
| 1      | S1    | 0.1008(3)  | 0.46175(16) | 0.31095(9)  |
| 2      | F1    | 0.1086(6)  | 0.3061(3)   | 0.3564(2)   |
| 3      | F4    | 0.3135(6)  | 0.3544(3)   | 0.3170(2)   |
| 4      | F6    | 0.2146(6)  | 0.3806(3)   | 0.39622(19) |
| 5      | O1    | 0.2076(6)  | 0.5214(4)   | 0.2992(2)   |
| 6      | O4    | 0.0710(6)  | 0.4382(4)   | 0.2604(2)   |
| 7      | O8    | -0.0264(6) | 0.4744(4)   | 0.3489(2)   |
| 8      | C14   | 0.1880(9)  | 0.3719(6)   | 0.3471(4)   |
| 9      | S2    | 0.8164(3)  | 0.55360(19) | 0.09048(11) |
| 10     | O6    | 0.9429(7)  | 0.5437(4)   | 0.1160(2)   |
| 11     | O3    | 0.7011(7)  | 0.5940(5)   | 0.1214(3)   |
| 12     | F3    | 0.9020(8)  | 0.6961(5)   | 0.0366(3)   |
| 13     | F2    | 0.9734(8)  | 0.6018(5)   | -0.0079(3)  |
| 14     | O9    | 0.7791(8)  | 0.4820(5)   | 0.0736(3)   |
| 15     | F5    | 0.7521(9)  | 0.6417(5)   | -0.0009(3)  |
| 16     | C39   | 0.8664(14) | 0.6244(8)   | 0.0266(4)   |
| 17     | N1    | 1.0453(8)  | 0.3842(5)   | 0.1554(3)   |
| 18     | H1    | 1.018716   | 0.434144    | 0.159202    |
| 19     | N4    | 0.7972(8)  | 0.4453(5)   | 0.2262(3)   |
| 20     | H4    | 0.88995    | 0.450037    | 0.224573    |
| 21     | O10   | -0.1012(8) | 0.8670(4)   | 0.4548(3)   |
| 22     | N6    | 0.9487(7)  | 0.6046(4)   | 0.2149(3)   |
| 23     | H6    | 0.955762   | 0.569929    | 0.192465    |
| 24     | N7    | 0.5308(8)  | 0.6566(5)   | 0.2992(3)   |
| 25     | O5    | 0.7073(8)  | 0.2850(4)   | 0.3990(3)   |
| 26     | N2    | 1.2137(7)  | 0.5305(5)   | 0.1594(3)   |
| 27     | H2    | 1.141764   | 0.509101    | 0.184287    |
| 28     | O7    | 0.1795(8)  | 0.8962(4)   | 0.2840(3)   |
| 29     | N5    | 0.5477(8)  | 0.2543(5)   | 0.4804(3)   |
| 30     | N3    | 0.0318(8)  | 0.8813(5)   | 0.3676(3)   |
| 31     | O2    | 0.4041(9)  | 0.2320(4)   | 0.5653(3)   |
| 32     | C1    | 0.5559(9)  | 0.3929(6)   | 0.4230(3)   |
| 33     | C4    | 0.5464(9)  | 0.5261(6)   | 0.3618(3)   |
| 34     | C6    | 0.4267(9)  | 0.5503(6)   | 0.3994(3)   |
| 35     | C8    | 1.2420(11) | 0.7514(6)   | 0.1638(3)   |

|    |     |            |           |           |
|----|-----|------------|-----------|-----------|
| 36 | C10 | 0.2581(8)  | 0.5213(6) | 0.4886(3) |
| 37 | C12 | 0.5920(9)  | 0.5839(6) | 0.3117(3) |
| 38 | C16 | 1.4505(10) | 0.8326(6) | 0.1463(3) |
| 39 | C18 | 1.1834(9)  | 0.3574(6) | 0.1394(3) |
| 40 | C20 | 0.4385(9)  | 0.4176(6) | 0.4620(3) |
| 41 | C22 | 1.2165(10) | 0.8968(6) | 0.1326(3) |
| 42 | C24 | 1.3648(11) | 0.9000(6) | 0.1303(3) |
| 43 | H24 | 1.408092   | 0.950993  | 0.117208  |
| 44 | C26 | 0.5592(10) | 0.4684(6) | 0.2429(3) |
| 45 | H26 | 0.467615   | 0.491193  | 0.255178  |
| 46 | C28 | 0.6906(9)  | 0.4946(6) | 0.2481(3) |
| 47 | C30 | 0.3610(9)  | 0.6271(6) | 0.3850(3) |
| 48 | C32 | 0.7346(10) | 0.3866(6) | 0.2070(3) |
| 49 | C34 | 0.2417(9)  | 0.6539(6) | 0.4205(3) |
| 50 | C36 | 1.1804(10) | 0.6707(6) | 0.1757(4) |
| 51 | C38 | 0.8353(10) | 0.6092(6) | 0.2576(4) |
| 52 | C40 | 0.2244(10) | 0.7790(6) | 0.3508(4) |
| 53 | C42 | 0.6065(10) | 0.4483(6) | 0.3762(3) |
| 54 | H42 | 0.687807   | 0.432648  | 0.351977  |
| 55 | C44 | 1.1581(11) | 0.8205(6) | 0.1494(3) |
| 56 | H44 | 1.057856   | 0.815968  | 0.151001  |
| 57 | C46 | 0.6457(10) | 0.1870(6) | 0.0435(4) |
| 58 | C48 | 0.9546(11) | 0.3204(6) | 0.1648(3) |
| 59 | C50 | 0.7205(10) | 0.2614(6) | 0.1721(4) |
| 60 | C52 | 1.0487(10) | 0.6609(6) | 0.2120(3) |
| 61 | C54 | 0.6198(9)  | 0.2203(6) | 0.2138(3) |
| 62 | H54 | 0.611719   | 0.229572  | 0.250696  |
| 63 | C56 | 1.3075(9)  | 0.4890(6) | 0.1259(4) |
| 64 | C58 | 0.2751(10) | 0.3890(7) | 0.5475(4) |
| 65 | H58 | 0.240773   | 0.352587  | 0.581173  |
| 66 | C60 | 1.0443(11) | 0.2513(6) | 0.1552(3) |
| 67 | H60 | 1.012766   | 0.197855  | 0.159483  |
| 68 | C62 | 0.1740(10) | 0.7283(6) | 0.4044(4) |
| 69 | C64 | 0.7146(9)  | 0.5625(6) | 0.2710(3) |
| 70 | C66 | 0.5301(10) | 0.1656(6) | 0.2028(4) |
| 71 | C68 | 0.8069(10) | 0.3249(6) | 0.1824(3) |
| 72 | C70 | 0.7286(9)  | 0.2498(5) | 0.1174(3) |
| 73 | H70 | 0.795435   | 0.278934  | 0.088386  |
| 74 | C72 | 0.2114(11) | 0.4647(7) | 0.5368(3) |
| 75 | H72 | 0.133367   | 0.479188  | 0.562963  |
| 76 | C74 | 0.1926(10) | 0.6024(7) | 0.4735(3) |
| 77 | C76 | 1.3915(10) | 0.7586(6) | 0.1632(3) |
| 78 | H76 | 1.449869   | 0.711817  | 0.174596  |
| 79 | C78 | 0.3749(9)  | 0.4962(6) | 0.4504(3) |
| 80 | C80 | 0.4138(9)  | 0.6788(6) | 0.3341(3) |
| 81 | C82 | 1.3018(9)  | 0.4077(6) | 0.1224(3) |

|     |      |             |           |           |
|-----|------|-------------|-----------|-----------|
| 82  | H82  | 1.388498    | 0.383325  | 0.106674  |
| 83  | C84  | 0.9903(10)  | 0.7042(6) | 0.2557(4) |
| 84  | H84  | 1.03258     | 0.749018  | 0.263646  |
| 85  | C85  | 0.3881(10)  | 0.3635(7) | 0.5110(4) |
| 86  | C43  | 0.3428(10)  | 0.7547(6) | 0.3176(4) |
| 87  | H43  | 0.377862    | 0.789024  | 0.283092  |
| 88  | C11  | 0.4439(10)  | 0.2809(7) | 0.5223(4) |
| 89  | C45  | 1.1796(10)  | 0.2742(7) | 0.1391(3) |
| 90  | H45  | 1.260012    | 0.239955  | 0.129237  |
| 91  | C23  | 0.4165(10)  | 0.1213(6) | 0.2494(4) |
| 92  | C47  | 0.5851(11)  | 0.4040(6) | 0.2169(4) |
| 93  | H47  | 0.513824    | 0.375277  | 0.207045  |
| 94  | C3   | 1.2483(9)   | 0.6097(6) | 0.1487(3) |
| 95  | C49  | 0.0774(10)  | 0.6326(7) | 0.5080(4) |
| 96  | H49  | 0.041691    | 0.599809  | 0.543073  |
| 97  | C25  | -0.0099(12) | 0.8364(8) | 0.4240(4) |
| 98  | C51  | 0.1455(11)  | 0.8555(6) | 0.3309(4) |
| 99  | C13  | 0.8674(10)  | 0.6714(6) | 0.2833(4) |
| 100 | H13  | 0.81102     | 0.68744   | 0.315062  |
| 101 | C53  | 1.6117(10)  | 0.8438(6) | 0.1410(4) |
| 102 | C27  | 0.6408(10)  | 0.1967(5) | 0.1052(4) |
| 103 | C55  | 0.0585(11)  | 0.7557(7) | 0.4400(4) |
| 104 | C7   | 1.3724(10)  | 0.6175(7) | 0.1053(4) |
| 105 | H7   | 1.419774    | 0.666145  | 0.087778  |
| 106 | C57  | 0.6132(11)  | 0.3088(6) | 0.4325(4) |
| 107 | C29  | 0.7791(10)  | 0.2216(6) | 0.0049(4) |
| 108 | H29A | 0.864872    | 0.192921  | 0.017801  |
| 109 | H29B | 0.775907    | 0.21482   | -0.03321  |
| 110 | H29C | 0.782417    | 0.279477  | 0.005137  |
| 111 | C59  | 0.5121(11)  | 0.2316(6) | 0.0234(4) |
| 112 | H59A | 0.426254    | 0.209217  | 0.048269  |
| 113 | H59B | 0.515303    | 0.289435  | 0.023666  |
| 114 | H59C | 0.508792    | 0.224778  | -0.01468  |
| 115 | C15  | 1.4077(11)  | 0.5449(7) | 0.0943(4) |
| 116 | H15  | 1.488912    | 0.532165  | 0.068889  |
| 117 | C61  | 0.0143(11)  | 0.7086(7) | 0.4924(4) |
| 118 | H61  | -0.05963    | 0.728825  | 0.517626  |
| 119 | C31  | 1.2060(10)  | 1.0494(6) | 0.0895(4) |
| 120 | H31A | 1.138237    | 1.094932  | 0.079825  |
| 121 | H31B | 1.262449    | 1.061546  | 0.116269  |
| 122 | H31C | 1.270496    | 1.040946  | 0.055654  |
| 123 | C63  | 0.3206(11)  | 0.0714(6) | 0.2290(4) |
| 124 | H63A | 0.266551    | 0.106698  | 0.202262  |
| 125 | H63B | 0.378778    | 0.031079  | 0.210712  |
| 126 | H63C | 0.253528    | 0.04356   | 0.260706  |
| 127 | C2   | 1.1225(11)  | 0.9720(7) | 0.1158(4) |



|     |      |             |            |            |
|-----|------|-------------|------------|------------|
| 128 | C65  | 0.6418(11)  | 0.0968(6)  | 0.0415(4)  |
| 129 | H65A | 0.556436    | 0.073487   | 0.066149   |
| 130 | H65B | 0.638451    | 0.091357   | 0.003138   |
| 131 | H65C | 0.728125    | 0.068025   | 0.053895   |
| 132 | C33  | 0.5429(10)  | 0.1567(6)  | 0.1475(4)  |
| 133 | H33  | 0.480698    | 0.121249   | 0.138655   |
| 134 | C67  | 1.0308(10)  | 0.9608(6)  | 0.0726(4)  |
| 135 | H67A | 0.971796    | 1.010352   | 0.062701   |
| 136 | H67B | 1.093643    | 0.949939   | 0.039006   |
| 137 | H67C | 0.96835     | 0.915083   | 0.088405   |
| 138 | C17  | 1.6386(11)  | 0.9127(6)  | 0.1698(4)  |
| 139 | H17A | 1.585588    | 0.962183   | 0.154647   |
| 140 | H17B | 1.605845    | 0.896945   | 0.210095   |
| 141 | H17C | 1.741462    | 0.922673   | 0.163004   |
| 142 | C69  | 0.4993(11)  | 0.0645(7)  | 0.2911(4)  |
| 143 | H69A | 0.562892    | 0.096175   | 0.304953   |
| 144 | H69B | 0.431321    | 0.03675    | 0.322436   |
| 145 | H69C | 0.556571    | 0.024269   | 0.272441   |
| 146 | C35  | 0.581(3)    | 0.1670(10) | 0.4872(15) |
| 147 | H35  | 0.548659    | 0.156345   | 0.528457   |
| 148 | C71  | 1.0231(11)  | 0.9889(6)  | 0.1691(4)  |
| 149 | H71A | 0.961477    | 1.037309   | 0.159147   |
| 150 | H71B | 0.963342    | 0.94225    | 0.185641   |
| 151 | H71C | 1.08185     | 0.997947   | 0.196082   |
| 152 | C9   | 0.3270(11)  | 0.1840(6)  | 0.2790(4)  |
| 153 | H9A  | 0.391007    | 0.216315   | 0.292149   |
| 154 | H9B  | 0.272082    | 0.219755   | 0.252732   |
| 155 | H9C  | 0.260878    | 0.155947   | 0.310852   |
| 156 | C73  | 1.6727(10)  | 0.8668(6)  | 0.0774(4)  |
| 157 | H73A | 1.621972    | 0.916084   | 0.060426   |
| 158 | H73B | 1.775314    | 0.876632   | 0.072714   |
| 159 | H73C | 1.659093    | 0.822298   | 0.059229   |
| 160 | C37  | 1.6945(11)  | 0.7671(7)  | 0.1649(4)  |
| 161 | H37A | 1.796538    | 0.778361   | 0.160161   |
| 162 | H37B | 1.657499    | 0.749724   | 0.204673   |
| 163 | H37C | 1.682788    | 0.724054   | 0.145079   |
| 164 | C75  | -0.2343(12) | 0.8719(7)  | 0.3233(4)  |
| 165 | H75A | -0.33739    | 0.865553   | 0.325563   |
| 166 | H75B | -0.18895    | 0.882787   | 0.284077   |
| 167 | H75C | -0.19121    | 0.822028   | 0.343181   |
| 168 | C19  | 0.398(3)    | 0.165(2)   | 0.4237(13) |
| 169 | H19A | 0.319734    | 0.133346   | 0.419366   |
| 170 | H19B | 0.362069    | 0.219952   | 0.427111   |
| 171 | H19C | 0.473629    | 0.167891   | 0.39098    |
| 172 | C77  | -0.2118(13) | 0.9415(7)  | 0.3496(5)  |
| 173 | H77A | -0.25987    | 0.930667   | 0.38896    |

|     |      |             |            |            |
|-----|------|-------------|------------|------------|
| 174 | H77B | -0.25761    | 0.99139    | 0.329891   |
| 175 | C79  | -0.0517(12) | 0.9562(7)  | 0.3480(4)  |
| 176 | H79  | -0.01297    | 0.971872   | 0.307306   |
| 177 | C5   | -0.0184(13) | 1.0264(7)  | 0.3722(5)  |
| 178 | H5A  | 0.086968    | 1.028184   | 0.369673   |
| 179 | H5B  | -0.06056    | 1.017044   | 0.412305   |
| 180 | C81  | -0.0767(13) | 1.1100(8)  | 0.3423(6)  |
| 181 | H81A | -0.05177    | 1.152903   | 0.359825   |
| 182 | H81B | -0.03362    | 1.120363   | 0.302769   |
| 183 | H81C | -0.18126    | 1.109214   | 0.345433   |
| 184 | C41  | 0.758(3)    | 0.0520(12) | 0.5129(9)  |
| 185 | H41A | 0.860261    | 0.040243   | 0.515442   |
| 186 | H41B | 0.700952    | 0.034891   | 0.549875   |
| 187 | H41C | 0.729951    | 0.022336   | 0.486668   |
| 188 | C83  | 0.460(2)    | 0.1243(12) | 0.4761(9)  |
| 189 | H83A | 0.382773    | 0.120324   | 0.508646   |
| 190 | H83B | 0.494147    | 0.06835    | 0.472576   |
| 191 | C21  | 0.733(2)    | 0.1417(11) | 0.4927(9)  |
| 192 | H21A | 0.764753    | 0.170984   | 0.51897    |
| 193 | H21B | 0.793704    | 0.158449   | 0.455867   |
| 194 | C41A | 0.753(3)    | 0.0602(16) | 0.5337(11) |
| 195 | H41D | 0.7872      | 0.042308   | 0.56966    |
| 196 | H41E | 0.707313    | 0.015314   | 0.524808   |
| 197 | H41F | 0.834504    | 0.077483   | 0.504417   |
| 198 | C21A | 0.646(2)    | 0.1299(12) | 0.5370(8)  |
| 199 | H21C | 0.69386     | 0.173654   | 0.547474   |
| 200 | H21D | 0.567162    | 0.111726   | 0.567786   |
| 201 | C35A | 0.582(4)    | 0.1658(10) | 0.4856(13) |
| 202 | H35A | 0.678635    | 0.175529   | 0.462412   |
| 203 | C83A | 0.529(2)    | 0.1330(12) | 0.4411(8)  |
| 204 | H83C | 0.538559    | 0.073082   | 0.450252   |
| 205 | H83D | 0.591855    | 0.151684   | 0.405194   |
| 206 | C19A | 0.374(3)    | 0.157(3)   | 0.4332(14) |
| 207 | H19D | 0.349805    | 0.132805   | 0.403479   |
| 208 | H19E | 0.309787    | 0.137423   | 0.468124   |
| 209 | H19F | 0.363223    | 0.216233   | 0.422947   |

**Table S6.** Cartesian coordinates of the single-crystal obtained for compound **PDPP**.

| Number | Label | X         | Y         | Z         |
|--------|-------|-----------|-----------|-----------|
| 1      | O1    | 0.4439(4) | 0.4671(3) | 0.9729(3) |
| 2      | N1    | 0.5964(4) | 0.5902(4) | 0.8527(3) |
| 3      | N6    | 0.8226(4) | 0.5440(4) | 0.8184(3) |
| 4      | N8    | 0.9692(4) | 0.5294(5) | 0.8293(4) |
| 5      | H8    | 0.92817   | 0.563165  | 0.823205  |
| 6      | N2    | 0.9309(5) | 0.6780(5) | 0.8528(4) |

|    |      |           |           |           |
|----|------|-----------|-----------|-----------|
| 7  | N9   | 0.7812(4) | 0.6906(4) | 0.8440(4) |
| 8  | H9   | 0.821892  | 0.660362  | 0.833645  |
| 9  | O6   | 0.4202(4) | 0.9297(4) | 0.5731(4) |
| 10 | O8   | 0.2090(4) | 0.5808(4) | 0.9088(4) |
| 11 | N5   | 0.3263(5) | 0.5237(5) | 0.9431(4) |
| 12 | C1   | 0.4987(5) | 0.5508(5) | 0.8902(4) |
| 13 | H1   | 0.53162   | 0.516098  | 0.917176  |
| 14 | C4   | 0.4265(5) | 0.5561(5) | 0.8918(4) |
| 15 | O3   | 0.6493(4) | 0.8145(4) | 0.6453(4) |
| 16 | C6   | 0.5257(5) | 0.5947(4) | 0.8502(4) |
| 17 | C10  | 0.7296(5) | 0.5090(5) | 0.7910(4) |
| 18 | H10  | 0.682014  | 0.508752  | 0.781961  |
| 19 | C16  | 0.4742(5) | 0.6446(4) | 0.8099(4) |
| 20 | C22  | 0.3013(5) | 0.6169(5) | 0.8566(4) |
| 21 | C24  | 0.7918(5) | 0.4554(5) | 0.7866(4) |
| 22 | H24  | 0.795344  | 0.411968  | 0.773351  |
| 23 | C26  | 0.3754(5) | 0.6077(5) | 0.8516(4) |
| 24 | C28  | 0.7146(6) | 0.6838(5) | 0.8420(5) |
| 25 | C32  | 1.0355(6) | 0.5349(6) | 0.8434(5) |
| 26 | N13  | 0.5343(5) | 0.8721(5) | 0.6081(4) |
| 27 | C42  | 0.8498(6) | 0.4766(5) | 0.8053(5) |
| 28 | C48  | 0.7480(5) | 0.5666(5) | 0.8117(4) |
| 29 | C52  | 0.9025(6) | 0.7471(6) | 0.8654(5) |
| 30 | C56  | 0.3753(5) | 0.7498(5) | 0.7290(4) |
| 31 | C60  | 0.3988(5) | 0.6521(5) | 0.8106(4) |
| 32 | C62  | 0.4311(6) | 0.8386(5) | 0.6498(5) |
| 33 | C64  | 0.5735(5) | 0.6858(5) | 0.7721(4) |
| 34 | C68  | 0.9235(6) | 0.4360(5) | 0.8090(5) |
| 35 | C70  | 0.4514(5) | 0.7423(4) | 0.7288(4) |
| 36 | C74  | 0.6189(5) | 0.6343(5) | 0.8170(5) |
| 37 | C76  | 0.3576(5) | 0.8458(5) | 0.6507(5) |
| 38 | H76  | 0.325394  | 0.881122  | 0.623769  |
| 39 | C80  | 0.4011(6) | 0.5113(6) | 0.9393(5) |
| 40 | C82  | 0.2770(5) | 0.7098(5) | 0.7780(4) |
| 41 | H82  | 0.242206  | 0.744607  | 0.752564  |
| 42 | C86  | 0.3302(5) | 0.8033(5) | 0.6896(4) |
| 43 | H86  | 0.279433  | 0.810528  | 0.689521  |
| 44 | C88  | 0.6974(5) | 0.6284(5) | 0.8232(4) |
| 45 | C92  | 0.2542(5) | 0.6659(5) | 0.8202(4) |
| 46 | H92  | 0.203993  | 0.671063  | 0.823152  |
| 47 | C94  | 0.3501(5) | 0.7037(5) | 0.7723(4) |
| 48 | C102 | 0.9796(6) | 0.4607(6) | 0.8265(5) |
| 49 | C104 | 0.5008(5) | 0.6909(4) | 0.7699(4) |
| 50 | C118 | 0.7744(6) | 0.7538(6) | 0.8653(5) |
| 51 | C124 | 0.2740(6) | 0.5730(6) | 0.9042(5) |
| 52 | C126 | 0.5536(5) | 0.7777(5) | 0.6904(5) |

|    |      |            |            |            |
|----|------|------------|------------|------------|
| 53 | C134 | 0.4781(5)  | 0.7868(5)  | 0.6896(4)  |
| 54 | C140 | 0.6626(6)  | 0.7443(5)  | 0.8618(5)  |
| 55 | H140 | 0.611724   | 0.752803   | 0.864348   |
| 56 | C148 | 1.0530(6)  | 0.5930(6)  | 0.8529(5)  |
| 57 | H148 | 1.103028   | 0.586998   | 0.858683   |
| 58 | C156 | 0.9982(6)  | 0.3299(6)  | 0.7660(6)  |
| 59 | H156 | 1.024174   | 0.356887   | 0.744183   |
| 60 | C160 | 0.9637(6)  | 0.7710(6)  | 0.8739(5)  |
| 61 | H160 | 0.961436   | 0.816333   | 0.881179   |
| 62 | C83  | 1.0880(6)  | 0.4659(6)  | 0.8508(5)  |
| 63 | H83  | 1.137846   | 0.454806   | 0.861444   |
| 64 | C43  | 0.5985(5)  | 0.7297(5)  | 0.7312(4)  |
| 65 | H43  | 0.648514   | 0.725895   | 0.732028   |
| 66 | C87  | 1.0544(6)  | 0.4220(6)  | 0.8400(5)  |
| 67 | H87  | 1.075483   | 0.373629   | 0.840987   |
| 68 | C89  | 0.9410(6)  | 0.3611(6)  | 0.8026(6)  |
| 69 | C91  | 0.8304(6)  | 0.7816(6)  | 0.8726(5)  |
| 70 | C93  | 0.5842(6)  | 0.8221(6)  | 0.6468(5)  |
| 71 | C47  | 0.4603(7)  | 0.8825(6)  | 0.6091(6)  |
| 72 | C97  | 1.0058(6)  | 0.6592(7)  | 0.8548(5)  |
| 73 | C99  | 0.8081(7)  | 0.8532(7)  | 0.8909(6)  |
| 74 | C101 | 0.6988(6)  | 0.7866(6)  | 0.8760(5)  |
| 75 | H101 | 0.678106   | 0.83045    | 0.8906     |
| 76 | C103 | 1.0262(7)  | 0.7161(6)  | 0.8694(5)  |
| 77 | H103 | 1.07438    | 0.716575   | 0.87505    |
| 78 | C53  | 0.9023(6)  | 0.3232(6)  | 0.8339(6)  |
| 79 | H53  | 0.864849   | 0.345194   | 0.860744   |
| 80 | C109 | 0.8351(7)  | 0.8679(7)  | 0.9460(6)  |
| 81 | H109 | 0.867961   | 0.832362   | 0.972262   |
| 82 | C111 | 0.7604(7)  | 0.9072(7)  | 0.8541(6)  |
| 83 | H111 | 0.74281    | 0.897355   | 0.816657   |
| 84 | C113 | 1.0824(7)  | 0.2212(6)  | 0.7200(6)  |
| 85 | C57  | 0.8120(8)  | 0.9377(8)  | 0.9619(7)  |
| 86 | C29  | 0.5593(8)  | 0.9207(8)  | 0.5634(7)  |
| 87 | H29  | 0.514241   | 0.95466    | 0.544023   |
| 88 | C117 | 1.0189(7)  | 0.2588(6)  | 0.7600(6)  |
| 89 | C15  | 0.2482(16) | 0.5250(15) | 1.0393(12) |
| 90 | H15A | 0.196645   | 0.540724   | 1.026027   |
| 91 | H15B | 0.25292    | 0.491717   | 1.076554   |
| 92 | C123 | 0.2905(17) | 0.4876(12) | 0.9899(10) |
| 93 | H123 | 0.334267   | 0.459125   | 1.01495    |
| 94 | C63  | 0.9160(7)  | 0.2528(6)  | 0.8276(7)  |
| 95 | C2   | 0.7684(8)  | 0.9843(8)  | 0.9226(7)  |
| 96 | H2   | 0.75767    | 1.030179   | 0.932678   |
| 97 | C129 | 0.7359(8)  | 0.9773(8)  | 0.8694(7)  |
| 98 | C65  | 0.9771(7)  | 0.2207(6)  | 0.7880(6)  |

|     |      |            |            |            |
|-----|------|------------|------------|------------|
| 99  | H65  | 0.988052   | 0.173649   | 0.781477   |
| 100 | C131 | 0.8860(17) | 0.2178(13) | 0.8851(13) |
| 101 | C135 | 0.895(2)   | 0.2414(19) | 0.9494(13) |
| 102 | H13A | 0.875763   | 0.291581   | 0.947267   |
| 103 | H13B | 0.868993   | 0.220975   | 0.980667   |
| 104 | H13C | 0.946803   | 0.226476   | 0.960879   |
| 105 | C137 | 0.6799(9)  | 1.0294(8)  | 0.8256(7)  |
| 106 | C69  | 0.2637(18) | 0.5784(15) | 1.0562(15) |
| 107 | H69A | 0.231166   | 0.597884   | 1.089379   |
| 108 | H69B | 0.314005   | 0.563872   | 1.071297   |
| 109 | H69C | 0.257441   | 0.613131   | 1.020509   |
| 110 | C35  | 0.6448(8)  | 1.0945(7)  | 0.8558(7)  |
| 111 | H35A | 0.62603    | 1.083128   | 0.896342   |
| 112 | H35B | 0.604885   | 1.124911   | 0.829289   |
| 113 | H35C | 0.680795   | 1.117815   | 0.861318   |
| 114 | C141 | 1.0511(7)  | 0.2023(6)  | 0.6632(7)  |
| 115 | H14A | 1.017697   | 0.176665   | 0.676397   |
| 116 | H14B | 1.090437   | 0.173786   | 0.639432   |
| 117 | H14C | 1.024811   | 0.24429    | 0.637112   |
| 118 | C9   | 0.8045(16) | 0.239(2)   | 0.865(2)   |
| 119 | H9A  | 0.783831   | 0.289601   | 0.862472   |
| 120 | H9B  | 0.800293   | 0.223488   | 0.824936   |
| 121 | H9C  | 0.778158   | 0.218815   | 0.896418   |
| 122 | C145 | 0.3209(14) | 0.3717(12) | 0.9654(12) |
| 123 | H14D | 0.3021     | 0.339669   | 0.945961   |
| 124 | H14E | 0.364087   | 0.375692   | 0.943385   |
| 125 | H14F | 0.333586   | 0.354576   | 1.008925   |
| 126 | C147 | 1.1259(7)  | 0.2683(6)  | 0.6969(7)  |
| 127 | H14G | 1.094948   | 0.30773    | 0.670534   |
| 128 | H14H | 1.167078   | 0.242938   | 0.672906   |
| 129 | H14I | 1.143831   | 0.284423   | 0.732516   |
| 130 | C149 | 1.1317(7)  | 0.1576(7)  | 0.7584(7)  |
| 131 | H14J | 1.15808    | 0.171962   | 0.789743   |
| 132 | H14K | 1.166341   | 0.128961   | 0.731002   |
| 133 | H14L | 1.102258   | 0.131231   | 0.778987   |
| 134 | C75  | 0.917(2)   | 0.1383(13) | 0.889(2)   |
| 135 | H75A | 0.911582   | 0.12276    | 0.848977   |
| 136 | H75B | 0.968618   | 0.123652   | 0.901009   |
| 137 | H75C | 0.890808   | 0.118151   | 0.920796   |
| 138 | C151 | 0.5952(9)  | 0.9602(8)  | 0.5937(8)  |
| 139 | H15C | 0.601423   | 0.996635   | 0.562694   |
| 140 | H15D | 0.644201   | 0.929672   | 0.606715   |
| 141 | C153 | 0.6013(9)  | 0.8850(8)  | 0.5109(8)  |
| 142 | H15E | 0.61092    | 0.91988    | 0.479996   |
| 143 | H15F | 0.648668   | 0.853745   | 0.52724    |
| 144 | C39  | 0.5603(9)  | 0.9925(7)  | 0.6473(8)  |

|     |      |            |            |            |
|-----|------|------------|------------|------------|
| 145 | H39A | 0.510113   | 1.019924   | 0.63638    |
| 146 | H39B | 0.586457   | 1.022368   | 0.660563   |
| 147 | H39C | 0.560648   | 0.957018   | 0.68116    |
| 148 | C157 | 0.7116(9)  | 1.0364(8)  | 0.7646(7)  |
| 149 | H15G | 0.753478   | 1.052523   | 0.768534   |
| 150 | H15H | 0.675409   | 1.069535   | 0.736501   |
| 151 | H15I | 0.727239   | 0.99166    | 0.747848   |
| 152 | C159 | 0.2720(14) | 0.4312(11) | 0.9625(13) |
| 153 | H15J | 0.228312   | 0.425548   | 0.983528   |
| 154 | H15K | 0.258686   | 0.446577   | 0.918259   |
| 155 | C161 | 0.6130(9)  | 1.0065(8)  | 0.8110(8)  |
| 156 | H16A | 0.629161   | 0.964716   | 0.789582   |
| 157 | H16B | 0.578399   | 1.043145   | 0.784413   |
| 158 | H16C | 0.589642   | 0.99719    | 0.849892   |
| 159 | C163 | 0.5658(10) | 0.8468(9)  | 0.4807(8)  |
| 160 | H16D | 0.582348   | 0.84348    | 0.437788   |
| 161 | H16E | 0.513321   | 0.869881   | 0.480754   |
| 162 | H16F | 0.576932   | 0.800639   | 0.502615   |
| 163 | C155 | 0.8213(15) | 0.9244(13) | 1.0731(10) |
| 164 | H15L | 0.842973   | 0.875128   | 1.069709   |
| 165 | H15M | 0.83955    | 0.936244   | 1.110914   |
| 166 | H15N | 0.768436   | 0.935864   | 1.075071   |
| 167 | C81  | 0.8074(13) | 1.0424(10) | 1.0215(11) |
| 168 | H81A | 0.820458   | 1.068139   | 0.985109   |
| 169 | H81B | 0.754604   | 1.05396    | 1.023396   |
| 170 | H81C | 0.825718   | 1.05434    | 1.059239   |
| 171 | C79  | 0.8412(12) | 0.9650(10) | 1.0166(9)  |
| 172 | C165 | 0.9245(12) | 0.9381(13) | 1.0210(14) |
| 173 | H16G | 0.94474    | 0.960548   | 0.98656    |
| 174 | H16H | 0.940552   | 0.948209   | 1.060534   |
| 175 | H16I | 0.941174   | 0.888287   | 1.018765   |
| 176 | O4   | 0.1370(4)  | 0.8415(3)  | 0.7243(4)  |
| 177 | N4   | 0.3108(4)  | 0.6339(4)  | 0.6351(4)  |
| 178 | N10  | 0.3341(4)  | 0.5162(4)  | 0.7335(4)  |
| 179 | H10A | 0.35617    | 0.510538   | 0.697709   |
| 180 | N12  | 0.4605(4)  | 0.6177(4)  | 0.6312(4)  |
| 181 | H12  | 0.430837   | 0.600012   | 0.652814   |
| 182 | N14  | 0.4832(4)  | 0.4974(4)  | 0.7293(4)  |
| 183 | N7   | 0.1196(4)  | 0.5443(4)  | 0.6740(3)  |
| 184 | O2   | -0.0142(5) | 0.3857(4)  | 0.6181(4)  |
| 185 | N11  | 0.0179(6)  | 0.9050(5)  | 0.7300(4)  |
| 186 | O5   | -0.2544(4) | 0.5013(4)  | 0.6342(3)  |
| 187 | C8   | -0.0072(5) | 0.6112(5)  | 0.6802(4)  |
| 188 | O7   | -0.1019(4) | 0.9687(4)  | 0.7354(4)  |
| 189 | N3   | -0.1353(5) | 0.4433(5)  | 0.6279(4)  |
| 190 | C12  | 0.4398(6)  | 0.6698(5)  | 0.5857(5)  |

|     |      |            |           |           |
|-----|------|------------|-----------|-----------|
| 191 | C14  | 0.3101(6)  | 0.6796(5) | 0.5867(5) |
| 192 | C18  | 0.2169(5)  | 0.5902(5) | 0.6853(4) |
| 193 | C20  | 0.2373(5)  | 0.7051(5) | 0.5575(5) |
| 194 | H20  | 0.222905   | 0.735859  | 0.520877  |
| 195 | C30  | 0.4277(6)  | 0.4216(5) | 0.7935(5) |
| 196 | C34  | 0.1023(5)  | 0.7243(5) | 0.7063(4) |
| 197 | H34  | 0.151913   | 0.72142   | 0.709128  |
| 198 | C36  | 0.6041(6)  | 0.4299(5) | 0.7461(5) |
| 199 | H36  | 0.655445   | 0.414923  | 0.743241  |
| 200 | C38  | 0.3573(6)  | 0.4594(5) | 0.7776(5) |
| 201 | C40  | 0.0848(5)  | 0.6652(5) | 0.6946(4) |
| 202 | C44  | 0.3056(6)  | 0.8130(5) | 0.5060(5) |
| 203 | H44  | 0.27861    | 0.825147  | 0.542379  |
| 204 | C46  | 0.2593(5)  | 0.5381(5) | 0.7274(5) |
| 205 | C50  | 0.2414(5)  | 0.6322(5) | 0.6409(5) |
| 206 | C54  | 0.5052(5)  | 0.6843(5) | 0.5646(5) |
| 207 | H54  | 0.507883   | 0.719233  | 0.533407  |
| 208 | C58  | 0.5355(6)  | 0.5958(5) | 0.6393(5) |
| 209 | C66  | 0.1363(5)  | 0.5992(5) | 0.6856(4) |
| 210 | C72  | 0.1956(6)  | 0.6762(5) | 0.5932(4) |
| 211 | H72  | 0.145219   | 0.68367   | 0.58759   |
| 212 | C78  | -0.0433(5) | 0.7312(5) | 0.7013(4) |
| 213 | C84  | -0.0771(6) | 0.8534(6) | 0.7172(5) |
| 214 | C90  | 0.5614(6)  | 0.6392(5) | 0.5973(5) |
| 215 | H90  | 0.610684   | 0.637058  | 0.592744  |
| 216 | C96  | 0.3592(6)  | 0.7488(5) | 0.5064(5) |
| 217 | C98  | -0.1721(6) | 0.5592(6) | 0.6562(4) |
| 218 | C100 | -0.1016(5) | 0.5581(5) | 0.6618(4) |
| 219 | C106 | 0.5644(5)  | 0.3983(5) | 0.7774(5) |
| 220 | H106 | 0.58211    | 0.3555    | 0.802163  |
| 221 | C108 | 0.3974(6)  | 0.7315(5) | 0.4530(5) |
| 222 | H108 | 0.431794   | 0.687112  | 0.452401  |
| 223 | C110 | -0.1387(5) | 0.6777(5) | 0.6842(4) |
| 224 | C112 | 0.4070(6)  | 0.3090(5) | 0.8229(5) |
| 225 | H112 | 0.377112   | 0.317223  | 0.786826  |
| 226 | C114 | -0.0237(5) | 0.7906(5) | 0.7105(4) |
| 227 | C116 | 0.0469(5)  | 0.5483(5) | 0.6719(4) |
| 228 | C120 | 0.0114(5)  | 0.6693(5) | 0.6932(4) |
| 229 | C122 | 0.4411(6)  | 0.3566(6) | 0.8351(5) |
| 230 | C128 | -0.1193(5) | 0.7366(5) | 0.6962(4) |
| 231 | C130 | 0.2900(5)  | 0.4497(5) | 0.8012(5) |
| 232 | H130 | 0.286732   | 0.415042  | 0.832495  |
| 233 | C132 | 0.4882(6)  | 0.4391(5) | 0.7682(5) |
| 234 | C136 | -0.0433(6) | 0.4954(5) | 0.6520(4) |
| 235 | C138 | 0.3324(6)  | 0.8407(5) | 0.4008(5) |
| 236 | H138 | 0.323281   | 0.87199   | 0.364294  |



|     |      |            |           |           |
|-----|------|------------|-----------|-----------|
| 237 | C142 | -0.0828(5) | 0.6157(5) | 0.6761(4) |
| 238 | C144 | 0.0523(6)  | 0.7834(5) | 0.7133(4) |
| 239 | C146 | 0.5531(6)  | 0.4935(5) | 0.7162(5) |
| 240 | C150 | 0.0747(7)  | 0.8445(6) | 0.7217(5) |
| 241 | C152 | 0.2344(6)  | 0.4969(5) | 0.7721(5) |
| 242 | H152 | 0.184912   | 0.502059  | 0.780256  |
| 243 | C154 | -0.0608(7) | 0.4358(6) | 0.6318(5) |
| 244 | C158 | 0.5774(6)  | 0.5399(5) | 0.6764(5) |
| 245 | H158 | 0.628304   | 0.531555  | 0.675096  |
| 246 | C162 | 0.3691(6)  | 0.6994(5) | 0.5623(5) |
| 247 | C164 | -0.1703(6) | 0.8014(5) | 0.7021(4) |
| 248 | H164 | -0.22054   | 0.807152  | 0.698549  |
| 249 | C166 | -0.2255(6) | 0.6196(6) | 0.6639(5) |
| 250 | H166 | -0.27455   | 0.620694  | 0.660618  |
| 251 | C21  | -0.1914(7) | 0.5010(7) | 0.6399(5) |
| 252 | C85  | 0.3866(6)  | 0.7774(6) | 0.4005(5) |
| 253 | C11  | 0.2918(6)  | 0.8588(5) | 0.4528(5) |
| 254 | C45  | -0.1478(6) | 0.8573(6) | 0.7132(5) |
| 255 | H45  | -0.18374   | 0.900032  | 0.718047  |
| 256 | C23  | 0.4164(7)  | 0.2494(6) | 0.8631(6) |
| 257 | C95  | 0.0280(5)  | 0.4920(5) | 0.6570(4) |
| 258 | H95  | 0.064991   | 0.450555  | 0.650273  |
| 259 | C3   | 0.4862(6)  | 0.3445(6) | 0.8869(5) |
| 260 | H3   | 0.508457   | 0.377567  | 0.89553   |
| 261 | C49  | -0.2120(6) | 0.6786(6) | 0.6762(5) |
| 262 | H49  | -0.25095   | 0.719759  | 0.679383  |
| 263 | C25  | 0.4297(7)  | 0.7584(6) | 0.3409(5) |
| 264 | C51  | 0.5490(7)  | 0.2699(6) | 0.9840(6) |
| 265 | C13  | 0.4989(7)  | 0.2837(6) | 0.9263(6) |
| 266 | C105 | 0.2301(6)  | 0.9280(6) | 0.4536(4) |
| 267 | C107 | -0.0564(7) | 0.9113(7) | 0.7272(6) |
| 268 | C27  | 0.4841(7)  | 0.6864(6) | 0.3478(5) |
| 269 | H27A | 0.515707   | 0.681318  | 0.383901  |
| 270 | H27B | 0.513424   | 0.679117  | 0.310302  |
| 271 | H27C | 0.458174   | 0.652526  | 0.353522  |
| 272 | C55  | -0.1515(7) | 0.3838(7) | 0.6021(6) |
| 273 | H55  | -0.103     | 0.353345  | 0.590115  |
| 274 | C7   | 0.4620(6)  | 0.2387(6) | 0.9143(6) |
| 275 | H7   | 0.468119   | 0.198714  | 0.942383  |
| 276 | C115 | 0.3753(7)  | 0.7626(6) | 0.2888(5) |
| 277 | H11A | 0.349578   | 0.729243  | 0.299888  |
| 278 | H11B | 0.401339   | 0.752243  | 0.250021  |
| 279 | H11C | 0.340409   | 0.809016  | 0.28335   |
| 280 | C59  | 0.3756(8)  | 0.2004(7) | 0.8512(7) |
| 281 | C119 | 0.0388(9)  | 0.9669(7) | 0.7400(7) |
| 282 | H119 | 0.09163    | 0.942377  | 0.735581  |



|     |      |            |           |           |
|-----|------|------------|-----------|-----------|
| 283 | C121 | 0.2347(9)  | 0.9686(7) | 0.5100(6) |
| 284 | H12A | 0.194165   | 1.011597  | 0.507556  |
| 285 | H12B | 0.232112   | 0.940623  | 0.548881  |
| 286 | H12C | 0.280552   | 0.978903  | 0.508848  |
| 287 | C61  | 0.4670(7)  | 0.8096(6) | 0.3214(5) |
| 288 | H61A | 0.431642   | 0.85583   | 0.317563  |
| 289 | H61B | 0.489986   | 0.79994   | 0.281244  |
| 290 | H61C | 0.504088   | 0.806895  | 0.352513  |
| 291 | C31  | 0.6078(9)  | 0.2016(7) | 0.9826(8) |
| 292 | H31A | 0.636156   | 0.202443  | 0.944808  |
| 293 | H31B | 0.639681   | 0.193263  | 1.019104  |
| 294 | H31C | 0.585741   | 0.164932  | 0.982994  |
| 295 | C125 | 0.5872(9)  | 0.3256(8) | 0.9851(7) |
| 296 | H12D | 0.550666   | 0.370828  | 0.986055  |
| 297 | H12E | 0.61854    | 0.315456  | 1.022168  |
| 298 | H12F | 0.616597   | 0.32563   | 0.947866  |
| 299 | C127 | -0.1761(8) | 0.3404(7) | 0.6533(6) |
| 300 | H12G | -0.22351   | 0.368046  | 0.668506  |
| 301 | H12H | -0.14091   | 0.328719  | 0.688394  |
| 302 | C33  | 0.4316(7)  | 0.1301(6) | 0.8444(7) |
| 303 | H33A | 0.407238   | 0.099153  | 0.830356  |
| 304 | H33B | 0.455527   | 0.110797  | 0.884671  |
| 305 | H33C | 0.46785    | 0.135438  | 0.814001  |
| 306 | C133 | 0.2211(9)  | 0.9770(7) | 0.3925(6) |
| 307 | H13D | 0.181119   | 1.019322  | 0.396769  |
| 308 | H13E | 0.26601    | 0.988133  | 0.384345  |
| 309 | H13F | 0.210437   | 0.954329  | 0.357844  |
| 310 | C67  | -0.1832(7) | 0.2742(7) | 0.6330(6) |
| 311 | H67A | -0.23041   | 0.283891  | 0.612409  |
| 312 | H67B | -0.17944   | 0.240826  | 0.669456  |
| 313 | H67C | -0.14451   | 0.255191  | 0.604046  |
| 314 | C17  | 0.4990(9)  | 0.2782(8) | 1.0400(6) |
| 315 | H17D | 0.463346   | 0.324303  | 1.035756  |
| 316 | H17E | 0.473874   | 0.243702  | 1.041996  |
| 317 | H17F | 0.527814   | 0.272032  | 1.078106  |
| 318 | C139 | 0.1558(7)  | 0.9129(8) | 0.4648(8) |
| 319 | H13G | 0.116429   | 0.956468  | 0.465344  |
| 320 | H13H | 0.146875   | 0.887842  | 0.43136   |
| 321 | H13I | 0.158133   | 0.885195  | 0.504733  |
| 322 | C71  | 0.3302(7)  | 0.2200(6) | 0.7917(7) |
| 323 | H71A | 0.361401   | 0.222982  | 0.756207  |
| 324 | H71B | 0.292971   | 0.26461   | 0.794013  |
| 325 | H71C | 0.306915   | 0.185031  | 0.78663   |
| 326 | C143 | -0.1591(9) | 0.4494(9) | 0.4919(7) |
| 327 | H14M | -0.17214   | 0.444308  | 0.449594  |
| 328 | H14N | -0.10637   | 0.430783  | 0.497686  |

|     |      |            |            |            |
|-----|------|------------|------------|------------|
| 329 | H14O | -0.17542   | 0.498139   | 0.498748   |
| 330 | C73  | -0.1948(9) | 0.4109(8)  | 0.5376(7)  |
| 331 | H73A | -0.20029   | 0.37111    | 0.518509   |
| 332 | H73B | -0.24395   | 0.441358   | 0.546004   |
| 333 | C37  | 0.0397(9)  | 1.0005(8)  | 0.6244(7)  |
| 334 | H37A | 0.035961   | 1.042974   | 0.597939   |
| 335 | H37B | 0.086136   | 0.965758   | 0.61737    |
| 336 | H37C | -7.9E-05   | 0.983555   | 0.614341   |
| 337 | C19  | 0.0461(9)  | 0.9296(8)  | 0.8556(7)  |
| 338 | H19A | 0.061602   | 0.881768   | 0.845965   |
| 339 | H19B | -0.00282   | 0.941373   | 0.872655   |
| 340 | H19C | 0.079671   | 0.935431   | 0.88627    |
| 341 | C77  | 0.3304(8)  | 0.1922(7)  | 0.9076(7)  |
| 342 | H77A | 0.294875   | 0.170332   | 0.89683    |
| 343 | H77B | 0.305146   | 0.237497   | 0.921173   |
| 344 | H77C | 0.36216    | 0.163504   | 0.941326   |
| 345 | C5   | 0.0460(10) | 0.9720(8)  | 0.8026(8)  |
| 346 | H5A  | 0.092226   | 0.982203   | 0.805434   |
| 347 | H5B  | 0.007666   | 1.015273   | 0.809798   |
| 348 | C41  | 0.0358(10) | 1.0131(8)  | 0.6849(8)  |
| 349 | H41A | -0.01027   | 1.050915   | 0.687737   |
| 350 | H41B | 0.074816   | 1.033351   | 0.690726   |
| 351 | C167 | 0.1808(19) | 0.928(2)   | 0.3968(14) |
| 352 | H16M | 0.139546   | 0.970616   | 0.393192   |
| 353 | H16N | 0.209106   | 0.925706   | 0.358653   |
| 354 | H16O | 0.163157   | 0.888499   | 0.403038   |
| 355 | C1A  | 0.2748(19) | 0.9791(16) | 0.439(2)   |
| 356 | H1AA | 0.242251   | 1.026452   | 0.437436   |
| 357 | H1AB | 0.312072   | 0.971034   | 0.470879   |
| 358 | H1AC | 0.297865   | 0.971593   | 0.39821    |
| 359 | C1B  | 0.188(2)   | 0.951(2)   | 0.5141(12) |
| 360 | H1BA | 0.151539   | 0.996374   | 0.504593   |
| 361 | H1BB | 0.164533   | 0.917734   | 0.530136   |
| 362 | H1BC | 0.22242    | 0.954668   | 0.545404   |
| 363 | C79A | 0.8556(12) | 0.9324(13) | 1.0249(9)  |
| 364 | C168 | 0.7936(15) | 0.9670(17) | 1.0673(12) |
| 365 | H16J | 0.764949   | 1.011867   | 1.046872   |
| 366 | H16K | 0.762402   | 0.938006   | 1.075629   |
| 367 | H16L | 0.813753   | 0.973388   | 1.106587   |
| 368 | C81A | 0.9088(17) | 0.9725(17) | 1.0068(16) |
| 369 | H81D | 0.882985   | 1.016003   | 0.982526   |
| 370 | H81E | 0.929533   | 0.982031   | 1.044486   |
| 371 | H81F | 0.94773    | 0.945176   | 0.9819     |
| 372 | C1C  | 0.8944(16) | 0.8641(12) | 1.0629(12) |
| 373 | H1CA | 0.93554    | 0.837716   | 1.039479   |
| 374 | H1CB | 0.911959   | 0.873177   | 1.102269   |

|     |      |            |            |            |
|-----|------|------------|------------|------------|
| 375 | H1CC | 0.860608   | 0.837795   | 1.071312   |
| 376 | C169 | 0.8639(9)  | 0.2127(7)  | 0.8520(9)  |
| 377 | C9A  | 0.7879(8)  | 0.2474(8)  | 0.8224(10) |
| 378 | H9AA | 0.770177   | 0.295582   | 0.831188   |
| 379 | H9AB | 0.790667   | 0.245276   | 0.777359   |
| 380 | H9AC | 0.754559   | 0.223492   | 0.839766   |
| 381 | C1D  | 0.8626(10) | 0.2153(8)  | 0.9243(9)  |
| 382 | H1DA | 0.91155    | 0.192861   | 0.941623   |
| 383 | H1DB | 0.845647   | 0.263238   | 0.933666   |
| 384 | H1DC | 0.829789   | 0.191271   | 0.942736   |
| 385 | C75A | 0.8885(10) | 0.1374(7)  | 0.8365(11) |
| 386 | H75D | 0.936766   | 0.113359   | 0.85457    |
| 387 | H75E | 0.85409    | 0.114593   | 0.853725   |
| 388 | H75F | 0.890199   | 0.136377   | 0.791318   |
| 389 | C170 | 0.2707(13) | 0.3722(10) | 1.0080(11) |
| 390 | H17A | 0.251404   | 0.357824   | 0.97209    |
| 391 | H17B | 0.317267   | 0.338138   | 1.021038   |
| 392 | H17C | 0.236475   | 0.375912   | 1.042244   |
| 393 | C1E  | 0.2802(14) | 0.4329(10) | 0.9925(11) |
| 394 | H1EA | 0.23082    | 0.457602   | 0.975638   |
| 395 | H1EB | 0.309388   | 0.420868   | 0.955016   |
| 396 | C15A | 0.2642(16) | 0.5468(14) | 1.0446(13) |
| 397 | H15O | 0.215185   | 0.571127   | 1.026891   |
| 398 | H15P | 0.257551   | 0.522682   | 1.08511    |
| 399 | C69A | 0.2935(14) | 0.5949(12) | 1.0565(12) |
| 400 | H69D | 0.262101   | 0.625533   | 1.084471   |
| 401 | H69E | 0.341321   | 0.572795   | 1.076179   |
| 402 | H69F | 0.298662   | 0.621573   | 1.017559   |
| 403 | C1F  | 0.3007(16) | 0.4931(11) | 1.0032(9)  |
| 404 | H1F  | 0.347993   | 0.470802   | 1.025783   |
| 405 | C31A | 0.564(3)   | 0.1918(11) | 1.000(3)   |
| 406 | H31D | 0.574478   | 0.168838   | 0.961907   |
| 407 | H31E | 0.605841   | 0.173563   | 1.028561   |
| 408 | H31F | 0.521448   | 0.183602   | 1.019813   |
| 409 | C17A | 0.535(3)   | 0.295(3)   | 1.0478(15) |
| 410 | H17G | 0.485845   | 0.295714   | 1.060772   |
| 411 | H17H | 0.570461   | 0.264438   | 1.077635   |
| 412 | H17I | 0.537955   | 0.341764   | 1.046242   |
| 413 | C171 | 0.6256(17) | 0.272(3)   | 0.972(3)   |
| 414 | H17J | 0.640896   | 0.256926   | 0.930793   |
| 415 | H17K | 0.626257   | 0.319723   | 0.972336   |
| 416 | H17L | 0.658763   | 0.242397   | 1.00373    |

**Table S7.** Bond distance data of **PDPP-triflate**.

| Number | Atom1 | Atom2 | Length   |
|--------|-------|-------|----------|
| 1      | S1    | O1    | 1.430(7) |
| 2      | S1    | O4    | 1.467(7) |
| 3      | S1    | O8    | 1.429(6) |
| 4      | S1    | C14   | 1.810(9) |
| 5      | F1    | C14   | 1.34(1)  |
| 6      | F4    | C14   | 1.34(1)  |
| 7      | F6    | C14   | 1.32(1)  |
| 8      | S2    | O6    | 1.429(7) |
| 9      | S2    | O3    | 1.438(8) |
| 10     | S2    | O9    | 1.44(1)  |
| 11     | S2    | C39   | 1.79(1)  |
| 12     | F3    | C39   | 1.36(2)  |
| 13     | F2    | C39   | 1.30(1)  |
| 14     | F5    | C39   | 1.36(2)  |
| 15     | N1    | H1    | 0.881    |
| 16     | N1    | C18   | 1.37(1)  |
| 17     | N1    | C48   | 1.38(1)  |
| 18     | N4    | H4    | 0.88     |
| 19     | N4    | C28   | 1.37(1)  |
| 20     | N4    | C32   | 1.39(1)  |
| 21     | O10   | C25   | 1.21(1)  |
| 22     | N6    | H6    | 0.88     |
| 23     | N6    | C38   | 1.38(1)  |
| 24     | N6    | C52   | 1.37(1)  |
| 25     | N7    | C12   | 1.32(1)  |
| 26     | N7    | C80   | 1.37(1)  |
| 27     | O5    | C57   | 1.22(1)  |
| 28     | N2    | H2    | 0.88     |
| 29     | N2    | C56   | 1.37(1)  |
| 30     | N2    | C3    | 1.36(1)  |
| 31     | O7    | C51   | 1.22(1)  |
| 32     | N5    | C11   | 1.42(1)  |
| 33     | N5    | C57   | 1.42(1)  |
| 34     | N5    | C35   | 1.46(2)  |
| 35     | N3    | C25   | 1.45(1)  |
| 36     | N3    | C51   | 1.39(1)  |
| 37     | N3    | C79   | 1.48(1)  |
| 38     | O2    | C11   | 1.22(1)  |
| 39     | C1    | C20   | 1.44(1)  |
| 40     | C1    | C42   | 1.37(1)  |
| 41     | C1    | C57   | 1.47(1)  |
| 42     | C4    | C6    | 1.43(1)  |
| 43     | C4    | C12   | 1.43(1)  |

|    |     |     |         |
|----|-----|-----|---------|
| 44 | C4  | C42 | 1.39(1) |
| 45 | C6  | C30 | 1.40(1) |
| 46 | C6  | C78 | 1.43(1) |
| 47 | C8  | C36 | 1.47(1) |
| 48 | C8  | C44 | 1.38(1) |
| 49 | C8  | C76 | 1.43(1) |
| 50 | C10 | C72 | 1.39(1) |
| 51 | C10 | C74 | 1.46(1) |
| 52 | C10 | C78 | 1.43(1) |
| 53 | C12 | C64 | 1.48(1) |
| 54 | C16 | C24 | 1.37(1) |
| 55 | C16 | C76 | 1.36(1) |
| 56 | C16 | C53 | 1.53(1) |
| 57 | C18 | C82 | 1.41(1) |
| 58 | C18 | C45 | 1.41(2) |
| 59 | C20 | C78 | 1.41(1) |
| 60 | C20 | C85 | 1.39(1) |
| 61 | C22 | C24 | 1.40(1) |
| 62 | C22 | C44 | 1.39(1) |
| 63 | C22 | C2  | 1.52(1) |
| 64 | C24 | H24 | 0.95    |
| 65 | C26 | H26 | 0.95    |
| 66 | C26 | C28 | 1.38(1) |
| 67 | C26 | C47 | 1.36(1) |
| 68 | C28 | C64 | 1.43(1) |
| 69 | C30 | C34 | 1.42(1) |
| 70 | C30 | C80 | 1.41(1) |
| 71 | C32 | C68 | 1.39(1) |
| 72 | C32 | C47 | 1.41(1) |
| 73 | C34 | C62 | 1.38(1) |
| 74 | C34 | C74 | 1.44(1) |
| 75 | C36 | C52 | 1.41(1) |
| 76 | C36 | C3  | 1.40(1) |
| 77 | C38 | C64 | 1.39(1) |
| 78 | C38 | C13 | 1.41(2) |
| 79 | C40 | C62 | 1.45(1) |
| 80 | C40 | C43 | 1.36(1) |
| 81 | C40 | C51 | 1.48(1) |
| 82 | C42 | H42 | 0.95    |
| 83 | C44 | H44 | 0.95    |
| 84 | C46 | C27 | 1.56(1) |
| 85 | C46 | C29 | 1.52(1) |
| 86 | C46 | C59 | 1.53(1) |
| 87 | C46 | C65 | 1.54(1) |
| 88 | C48 | C60 | 1.43(1) |
| 89 | C48 | C68 | 1.39(1) |

|     |     |      |         |
|-----|-----|------|---------|
| 90  | C50 | C54  | 1.39(1) |
| 91  | C50 | C68  | 1.48(2) |
| 92  | C50 | C70  | 1.40(1) |
| 93  | C52 | C84  | 1.44(1) |
| 94  | C54 | H54  | 0.95    |
| 95  | C54 | C66  | 1.39(1) |
| 96  | C56 | C82  | 1.40(1) |
| 97  | C56 | C15  | 1.40(1) |
| 98  | C58 | H58  | 0.95    |
| 99  | C58 | C72  | 1.36(2) |
| 100 | C58 | C85  | 1.38(1) |
| 101 | C60 | H60  | 0.95    |
| 102 | C60 | C45  | 1.33(1) |
| 103 | C62 | C55  | 1.40(1) |
| 104 | C66 | C23  | 1.54(1) |
| 105 | C66 | C33  | 1.39(1) |
| 106 | C70 | H70  | 0.95    |
| 107 | C70 | C27  | 1.38(1) |
| 108 | C72 | H72  | 0.95    |
| 109 | C74 | C49  | 1.40(1) |
| 110 | C76 | H76  | 0.95    |
| 111 | C80 | C43  | 1.42(1) |
| 112 | C82 | H82  | 0.95    |
| 113 | C84 | H84  | 0.95    |
| 114 | C84 | C13  | 1.34(1) |
| 115 | C85 | C11  | 1.44(2) |
| 116 | C43 | H43  | 0.95    |
| 117 | C45 | H45  | 0.95    |
| 118 | C23 | C63  | 1.49(2) |
| 119 | C23 | C69  | 1.53(1) |
| 120 | C23 | C9   | 1.54(1) |
| 121 | C47 | H47  | 0.95    |
| 122 | C3  | C7   | 1.45(1) |
| 123 | C49 | H49  | 0.95    |
| 124 | C49 | C61  | 1.38(2) |
| 125 | C25 | C55  | 1.47(2) |
| 126 | C13 | H13  | 0.95    |
| 127 | C53 | C17  | 1.54(2) |
| 128 | C53 | C73  | 1.56(1) |
| 129 | C53 | C37  | 1.52(1) |
| 130 | C27 | C33  | 1.37(1) |
| 131 | C55 | C61  | 1.39(1) |
| 132 | C7  | H7   | 0.95    |
| 133 | C7  | C15  | 1.32(2) |
| 134 | C29 | H29A | 0.98    |
| 135 | C29 | H29B | 0.98    |

|     |     |      |         |
|-----|-----|------|---------|
| 136 | C29 | H29C | 0.98    |
| 137 | C59 | H59A | 0.98    |
| 138 | C59 | H59B | 0.98    |
| 139 | C59 | H59C | 0.98    |
| 140 | C15 | H15  | 0.95    |
| 141 | C61 | H61  | 0.95    |
| 142 | C31 | H31A | 0.98    |
| 143 | C31 | H31B | 0.98    |
| 144 | C31 | H31C | 0.98    |
| 145 | C31 | C2   | 1.54(1) |
| 146 | C63 | H63A | 0.98    |
| 147 | C63 | H63B | 0.98    |
| 148 | C63 | H63C | 0.981   |
| 149 | C2  | C67  | 1.54(2) |
| 150 | C2  | C71  | 1.55(1) |
| 151 | C65 | H65A | 0.98    |
| 152 | C65 | H65B | 0.98    |
| 153 | C65 | H65C | 0.98    |
| 154 | C33 | H33  | 0.95    |
| 155 | C67 | H67A | 0.981   |
| 156 | C67 | H67B | 0.98    |
| 157 | C67 | H67C | 0.98    |
| 158 | C17 | H17A | 0.98    |
| 159 | C17 | H17B | 0.98    |
| 160 | C17 | H17C | 0.98    |
| 161 | C69 | H69A | 0.98    |
| 162 | C69 | H69B | 0.979   |
| 163 | C69 | H69C | 0.98    |
| 164 | C35 | H35  | 1       |
| 165 | C35 | C83  | 1.49(4) |
| 166 | C35 | C21  | 1.49(3) |
| 167 | C71 | H71A | 0.98    |
| 168 | C71 | H71B | 0.98    |
| 169 | C71 | H71C | 0.98    |
| 170 | C9  | H9A  | 0.98    |
| 171 | C9  | H9B  | 0.98    |
| 172 | C9  | H9C  | 0.979   |
| 173 | C73 | H73A | 0.98    |
| 174 | C73 | H73B | 0.98    |
| 175 | C73 | H73C | 0.98    |
| 176 | C37 | H37A | 0.98    |
| 177 | C37 | H37B | 0.979   |
| 178 | C37 | H37C | 0.98    |
| 179 | C75 | H75A | 0.98    |
| 180 | C75 | H75B | 0.979   |
| 181 | C75 | H75C | 0.98    |

|     |     |      |         |
|-----|-----|------|---------|
| 182 | C75 | C77  | 1.50(2) |
| 183 | C19 | H19A | 0.98    |
| 184 | C19 | H19B | 0.98    |
| 185 | C19 | H19C | 0.98    |
| 186 | C19 | C83  | 1.53(4) |
| 187 | C77 | H77A | 0.99    |
| 188 | C77 | H77B | 0.99    |
| 189 | C77 | C79  | 1.54(2) |
| 190 | C79 | H79  | 1       |
| 191 | C79 | C5   | 1.51(2) |
| 192 | C5  | H5A  | 0.99    |
| 193 | C5  | H5B  | 0.99    |
| 194 | C5  | C81  | 1.56(2) |
| 195 | C81 | H81A | 0.98    |
| 196 | C81 | H81B | 0.98    |
| 197 | C81 | H81C | 0.98    |
| 198 | C41 | H41A | 0.98    |
| 199 | C41 | H41B | 0.98    |
| 200 | C41 | H41C | 0.98    |
| 201 | C41 | C21  | 1.51(3) |
| 202 | C83 | H83A | 0.99    |
| 203 | C83 | H83B | 0.99    |
| 204 | C21 | H21A | 0.99    |
| 205 | C21 | H21B | 0.99    |

**Table S8.** Bond distance data of **PDPP**.

| Number | Atom1 | Atom2 | Length  |
|--------|-------|-------|---------|
| 1      | O1    | C80   | 1.21(1) |
| 2      | N1    | C6    | 1.35(1) |
| 3      | N1    | C74   | 1.31(1) |
| 4      | N6    | C42   | 1.38(1) |
| 5      | N6    | C48   | 1.38(1) |
| 6      | N8    | H8    | 0.879   |
| 7      | N8    | C32   | 1.37(2) |
| 8      | N8    | C102  | 1.37(2) |
| 9      | N2    | C52   | 1.41(2) |
| 10     | N2    | C97   | 1.38(1) |
| 11     | N9    | H9    | 0.881   |
| 12     | N9    | C28   | 1.35(1) |
| 13     | N9    | C118  | 1.39(2) |
| 14     | O6    | C47   | 1.25(1) |
| 15     | O8    | C124  | 1.23(1) |
| 16     | N5    | C80   | 1.40(2) |
| 17     | N5    | C124  | 1.41(1) |
| 18     | N5    | C123  | 1.49(3) |



|    |     |      |         |
|----|-----|------|---------|
| 19 | C1  | H1   | 0.95    |
| 20 | C1  | C4   | 1.37(1) |
| 21 | C1  | C6   | 1.40(1) |
| 22 | C4  | C26  | 1.43(1) |
| 23 | C4  | C80  | 1.49(2) |
| 24 | O3  | C93  | 1.23(1) |
| 25 | C6  | C16  | 1.42(1) |
| 26 | C10 | H10  | 0.95    |
| 27 | C10 | C24  | 1.37(1) |
| 28 | C10 | C48  | 1.46(2) |
| 29 | C16 | C60  | 1.43(1) |
| 30 | C16 | C104 | 1.43(1) |
| 31 | C22 | C26  | 1.40(1) |
| 32 | C22 | C92  | 1.33(1) |
| 33 | C22 | C124 | 1.50(2) |
| 34 | C24 | H24  | 0.95    |
| 35 | C24 | C42  | 1.41(2) |
| 36 | C26 | C60  | 1.38(1) |
| 37 | C28 | C88  | 1.39(2) |
| 38 | C28 | C140 | 1.44(1) |
| 39 | C32 | C148 | 1.38(2) |
| 40 | C32 | C83  | 1.46(1) |
| 41 | N13 | C93  | 1.39(1) |
| 42 | N13 | C47  | 1.39(2) |
| 43 | N13 | C29  | 1.51(2) |
| 44 | C42 | C68  | 1.41(1) |
| 45 | C48 | C88  | 1.39(1) |
| 46 | C52 | C160 | 1.45(2) |
| 47 | C52 | C91  | 1.37(1) |
| 48 | C56 | C70  | 1.44(1) |
| 49 | C56 | C86  | 1.39(1) |
| 50 | C56 | C94  | 1.46(1) |
| 51 | C60 | C94  | 1.39(1) |
| 52 | C62 | C76  | 1.39(2) |
| 53 | C62 | C134 | 1.39(1) |
| 54 | C62 | C47  | 1.44(2) |
| 55 | C64 | C74  | 1.44(1) |
| 56 | C64 | C104 | 1.39(1) |
| 57 | C64 | C43  | 1.39(1) |
| 58 | C68 | C102 | 1.41(2) |
| 59 | C68 | C89  | 1.49(2) |
| 60 | C70 | C104 | 1.43(1) |
| 61 | C70 | C134 | 1.40(1) |
| 62 | C74 | C88  | 1.50(1) |
| 63 | C76 | H76  | 0.949   |
| 64 | C76 | C86  | 1.37(1) |

|     |      |      |         |
|-----|------|------|---------|
| 65  | C82  | H82  | 0.95    |
| 66  | C82  | C92  | 1.39(1) |
| 67  | C82  | C94  | 1.39(1) |
| 68  | C86  | H86  | 0.95    |
| 69  | C92  | H92  | 0.95    |
| 70  | C102 | C87  | 1.44(1) |
| 71  | C118 | C91  | 1.40(2) |
| 72  | C118 | C101 | 1.44(1) |
| 73  | C126 | C134 | 1.42(1) |
| 74  | C126 | C43  | 1.35(1) |
| 75  | C126 | C93  | 1.49(2) |
| 76  | C140 | H140 | 0.95    |
| 77  | C140 | C101 | 1.34(2) |
| 78  | C148 | H148 | 0.95    |
| 79  | C148 | C97  | 1.39(2) |
| 80  | C156 | H156 | 0.95    |
| 81  | C156 | C89  | 1.38(2) |
| 82  | C156 | C117 | 1.41(2) |
| 83  | C160 | H160 | 0.95    |
| 84  | C160 | C103 | 1.38(1) |
| 85  | C83  | H83  | 0.95    |
| 86  | C83  | C87  | 1.31(2) |
| 87  | C43  | H43  | 0.95    |
| 88  | C87  | H87  | 0.95    |
| 89  | C89  | C53  | 1.37(2) |
| 90  | C91  | C99  | 1.49(2) |
| 91  | C97  | C103 | 1.42(2) |
| 92  | C99  | C109 | 1.41(2) |
| 93  | C99  | C111 | 1.39(2) |
| 94  | C101 | H101 | 0.95    |
| 95  | C103 | H103 | 0.95    |
| 96  | C53  | H53  | 0.95    |
| 97  | C53  | C63  | 1.41(2) |
| 98  | C109 | H109 | 0.95    |
| 99  | C109 | C57  | 1.44(2) |
| 100 | C111 | H111 | 0.95    |
| 101 | C111 | C129 | 1.44(2) |
| 102 | C113 | C117 | 1.54(2) |
| 103 | C113 | C141 | 1.52(2) |
| 104 | C113 | C147 | 1.52(2) |
| 105 | C113 | C149 | 1.53(2) |
| 106 | C57  | C2   | 1.31(2) |
| 107 | C57  | C79  | 1.55(3) |
| 108 | C29  | H29  | 1       |
| 109 | C29  | C151 | 1.44(3) |
| 110 | C29  | C153 | 1.50(2) |

|     |      |      |         |
|-----|------|------|---------|
| 111 | C117 | C65  | 1.39(2) |
| 112 | C15  | H15A | 0.99    |
| 113 | C15  | H15B | 0.99    |
| 114 | C15  | C123 | 1.47(4) |
| 115 | C15  | C69  | 1.32(5) |
| 116 | C123 | H123 | 1       |
| 117 | C123 | C159 | 1.50(4) |
| 118 | C63  | C65  | 1.47(2) |
| 119 | C63  | C131 | 1.57(3) |
| 120 | C2   | H2   | 0.95    |
| 121 | C2   | C129 | 1.37(2) |
| 122 | C129 | C137 | 1.53(2) |
| 123 | C65  | H65  | 0.95    |
| 124 | C131 | C135 | 1.55(4) |
| 125 | C131 | C9   | 1.56(4) |
| 126 | C131 | C75  | 1.55(4) |
| 127 | C135 | H13A | 0.98    |
| 128 | C135 | H13B | 0.98    |
| 129 | C135 | H13C | 0.98    |
| 130 | C137 | C35  | 1.51(2) |
| 131 | C137 | C157 | 1.46(2) |
| 132 | C137 | C161 | 1.56(3) |
| 133 | C69  | H69A | 0.98    |
| 134 | C69  | H69B | 0.98    |
| 135 | C69  | H69C | 0.98    |
| 136 | C35  | H35A | 0.98    |
| 137 | C35  | H35B | 0.98    |
| 138 | C35  | H35C | 0.98    |
| 139 | C141 | H14A | 0.98    |
| 140 | C141 | H14B | 0.98    |
| 141 | C141 | H14C | 0.98    |
| 142 | C9   | H9A  | 0.99    |
| 143 | C9   | H9B  | 0.97    |
| 144 | C9   | H9C  | 0.98    |
| 145 | C145 | H14D | 0.98    |
| 146 | C145 | H14E | 0.98    |
| 147 | C145 | H14F | 0.98    |
| 148 | C145 | C159 | 1.29(3) |
| 149 | C147 | H14G | 0.98    |
| 150 | C147 | H14H | 0.98    |
| 151 | C147 | H14I | 0.98    |
| 152 | C149 | H14J | 0.98    |
| 153 | C149 | H14K | 0.98    |
| 154 | C149 | H14L | 0.98    |
| 155 | C75  | H75A | 0.97    |
| 156 | C75  | H75B | 0.98    |

|     |      |      |         |
|-----|------|------|---------|
| 157 | C75  | H75C | 0.98    |
| 158 | C151 | H15C | 0.99    |
| 159 | C151 | H15D | 0.99    |
| 160 | C151 | C39  | 1.45(2) |
| 161 | C153 | H15E | 0.99    |
| 162 | C153 | H15F | 0.99    |
| 163 | C153 | C163 | 1.41(3) |
| 164 | C39  | H39A | 0.98    |
| 165 | C39  | H39B | 0.98    |
| 166 | C39  | H39C | 0.98    |
| 167 | C157 | H15G | 0.98    |
| 168 | C157 | H15H | 0.98    |
| 169 | C157 | H15I | 0.98    |
| 170 | C159 | H15J | 0.99    |
| 171 | C159 | H15K | 0.99    |
| 172 | C161 | H16A | 0.98    |
| 173 | C161 | H16B | 0.98    |
| 174 | C161 | H16C | 0.98    |
| 175 | C163 | H16D | 0.98    |
| 176 | C163 | H16E | 0.98    |
| 177 | C163 | H16F | 0.98    |
| 178 | C155 | H15L | 0.98    |
| 179 | C155 | H15M | 0.98    |
| 180 | C155 | H15N | 0.98    |
| 181 | C155 | C79  | 1.52(3) |
| 182 | C81  | H81A | 0.98    |
| 183 | C81  | H81B | 0.98    |
| 184 | C81  | H81C | 0.98    |
| 185 | C81  | C79  | 1.54(3) |
| 186 | C79  | C165 | 1.54(3) |
| 187 | C165 | H16G | 0.98    |
| 188 | C165 | H16H | 0.98    |
| 189 | C165 | H16I | 0.98    |
| 190 | O4   | C150 | 1.20(2) |
| 191 | N4   | C14  | 1.33(1) |
| 192 | N4   | C50  | 1.36(1) |
| 193 | N10  | H10A | 0.879   |
| 194 | N10  | C38  | 1.39(1) |
| 195 | N10  | C46  | 1.38(1) |
| 196 | N12  | H12  | 0.879   |
| 197 | N12  | C12  | 1.35(1) |
| 198 | N12  | C58  | 1.39(1) |
| 199 | N14  | C132 | 1.37(1) |
| 200 | N14  | C146 | 1.36(1) |
| 201 | N7   | C66  | 1.32(1) |
| 202 | N7   | C116 | 1.39(1) |

|     |     |      |         |
|-----|-----|------|---------|
| 203 | O2  | C154 | 1.20(1) |
| 204 | N11 | C150 | 1.41(1) |
| 205 | N11 | C107 | 1.41(2) |
| 206 | N11 | C119 | 1.49(2) |
| 207 | O5  | C21  | 1.23(2) |
| 208 | C8  | C116 | 1.41(1) |
| 209 | C8  | C120 | 1.41(2) |
| 210 | C8  | C142 | 1.45(1) |
| 211 | O7  | C107 | 1.26(1) |
| 212 | N3  | C154 | 1.41(2) |
| 213 | N3  | C21  | 1.38(1) |
| 214 | N3  | C55  | 1.52(2) |
| 215 | C12 | C54  | 1.45(2) |
| 216 | C12 | C162 | 1.40(2) |
| 217 | C14 | C20  | 1.47(1) |
| 218 | C14 | C162 | 1.41(2) |
| 219 | C18 | C46  | 1.39(1) |
| 220 | C18 | C50  | 1.41(1) |
| 221 | C18 | C66  | 1.52(1) |
| 222 | C20 | H20  | 0.95    |
| 223 | C20 | C72  | 1.34(2) |
| 224 | C30 | C38  | 1.37(1) |
| 225 | C30 | C122 | 1.49(1) |
| 226 | C30 | C132 | 1.42(2) |
| 227 | C34 | H34  | 0.95    |
| 228 | C34 | C40  | 1.41(2) |
| 229 | C34 | C144 | 1.32(1) |
| 230 | C36 | H36  | 0.95    |
| 231 | C36 | C106 | 1.30(2) |
| 232 | C36 | C146 | 1.47(1) |
| 233 | C38 | C130 | 1.46(2) |
| 234 | C40 | C66  | 1.44(1) |
| 235 | C40 | C120 | 1.40(1) |
| 236 | C44 | H44  | 0.95    |
| 237 | C44 | C96  | 1.40(1) |
| 238 | C44 | C11  | 1.39(1) |
| 239 | C46 | C152 | 1.40(2) |
| 240 | C50 | C72  | 1.42(1) |
| 241 | C54 | H54  | 0.95    |
| 242 | C54 | C90  | 1.35(1) |
| 243 | C58 | C90  | 1.41(2) |
| 244 | C58 | C158 | 1.37(1) |
| 245 | C72 | H72  | 0.95    |
| 246 | C78 | C114 | 1.43(2) |
| 247 | C78 | C120 | 1.40(1) |
| 248 | C78 | C128 | 1.45(1) |

|     |      |      |         |
|-----|------|------|---------|
| 249 | C84  | C114 | 1.40(1) |
| 250 | C84  | C45  | 1.36(2) |
| 251 | C84  | C107 | 1.41(2) |
| 252 | C90  | H90  | 0.95    |
| 253 | C96  | C108 | 1.38(2) |
| 254 | C96  | C162 | 1.47(1) |
| 255 | C98  | C100 | 1.37(2) |
| 256 | C98  | C166 | 1.37(1) |
| 257 | C98  | C21  | 1.44(2) |
| 258 | C100 | C136 | 1.46(1) |
| 259 | C100 | C142 | 1.41(2) |
| 260 | C106 | H106 | 0.95    |
| 261 | C106 | C132 | 1.46(1) |
| 262 | C108 | H108 | 0.949   |
| 263 | C108 | C85  | 1.38(1) |
| 264 | C110 | C128 | 1.43(2) |
| 265 | C110 | C142 | 1.42(1) |
| 266 | C110 | C49  | 1.43(2) |
| 267 | C112 | H112 | 0.95    |
| 268 | C112 | C122 | 1.39(2) |
| 269 | C112 | C23  | 1.40(2) |
| 270 | C114 | C144 | 1.44(2) |
| 271 | C116 | C95  | 1.39(2) |
| 272 | C122 | C3   | 1.39(2) |
| 273 | C128 | C164 | 1.41(1) |
| 274 | C130 | H130 | 0.95    |
| 275 | C130 | C152 | 1.32(1) |
| 276 | C136 | C154 | 1.48(2) |
| 277 | C136 | C95  | 1.37(2) |
| 278 | C138 | H138 | 0.95    |
| 279 | C138 | C85  | 1.40(1) |
| 280 | C138 | C11  | 1.38(2) |
| 281 | C144 | C150 | 1.48(2) |
| 282 | C146 | C158 | 1.41(2) |
| 283 | C152 | H152 | 0.95    |
| 284 | C158 | H158 | 0.95    |
| 285 | C164 | H164 | 0.95    |
| 286 | C164 | C45  | 1.40(2) |
| 287 | C166 | H166 | 0.95    |
| 288 | C166 | C49  | 1.37(2) |
| 289 | C85  | C25  | 1.54(2) |
| 290 | C11  | C105 | 1.55(1) |
| 291 | C45  | H45  | 0.95    |
| 292 | C23  | C7   | 1.39(2) |
| 293 | C23  | C59  | 1.51(2) |
| 294 | C95  | H95  | 0.95    |

|     |      |      |         |
|-----|------|------|---------|
| 295 | C3   | H3   | 0.95    |
| 296 | C3   | C13  | 1.40(2) |
| 297 | C49  | H49  | 0.95    |
| 298 | C25  | C27  | 1.52(2) |
| 299 | C25  | C115 | 1.54(2) |
| 300 | C25  | C61  | 1.48(2) |
| 301 | C51  | C13  | 1.54(2) |
| 302 | C51  | C31  | 1.51(2) |
| 303 | C51  | C125 | 1.55(2) |
| 304 | C51  | C17  | 1.53(2) |
| 305 | C13  | C7   | 1.39(2) |
| 306 | C105 | C121 | 1.57(2) |
| 307 | C105 | C133 | 1.56(2) |
| 308 | C105 | C139 | 1.58(2) |
| 309 | C27  | H27A | 0.98    |
| 310 | C27  | H27B | 0.98    |
| 311 | C27  | H27C | 0.98    |
| 312 | C55  | H55  | 1       |
| 313 | C55  | C127 | 1.52(2) |
| 314 | C55  | C73  | 1.60(2) |
| 315 | C7   | H7   | 0.95    |
| 316 | C115 | H11A | 0.98    |
| 317 | C115 | H11B | 0.98    |
| 318 | C115 | H11C | 0.98    |
| 319 | C59  | C33  | 1.53(2) |
| 320 | C59  | C71  | 1.52(2) |
| 321 | C59  | C77  | 1.52(2) |
| 322 | C119 | H119 | 1       |
| 323 | C119 | C5   | 1.38(2) |
| 324 | C119 | C41  | 1.44(2) |
| 325 | C121 | H12A | 0.98    |
| 326 | C121 | H12B | 0.98    |
| 327 | C121 | H12C | 0.98    |
| 328 | C61  | H61A | 0.98    |
| 329 | C61  | H61B | 0.98    |
| 330 | C61  | H61C | 0.98    |
| 331 | C31  | H31A | 0.98    |
| 332 | C31  | H31B | 0.98    |
| 333 | C31  | H31C | 0.98    |
| 334 | C125 | H12D | 0.98    |
| 335 | C125 | H12E | 0.98    |
| 336 | C125 | H12F | 0.98    |
| 337 | C127 | H12G | 0.99    |
| 338 | C127 | H12H | 0.99    |
| 339 | C127 | C67  | 1.52(2) |
| 340 | C33  | H33A | 0.98    |

|     |      |      |         |
|-----|------|------|---------|
| 341 | C33  | H33B | 0.98    |
| 342 | C33  | H33C | 0.98    |
| 343 | C133 | H13D | 0.98    |
| 344 | C133 | H13E | 0.98    |
| 345 | C133 | H13F | 0.98    |
| 346 | C67  | H67A | 0.98    |
| 347 | C67  | H67B | 0.98    |
| 348 | C67  | H67C | 0.98    |
| 349 | C17  | H17D | 0.98    |
| 350 | C17  | H17E | 0.98    |
| 351 | C17  | H17F | 0.98    |
| 352 | C139 | H13G | 0.98    |
| 353 | C139 | H13H | 0.98    |
| 354 | C139 | H13I | 0.98    |
| 355 | C71  | H71A | 0.98    |
| 356 | C71  | H71B | 0.98    |
| 357 | C71  | H71C | 0.98    |
| 358 | C143 | H14M | 0.98    |
| 359 | C143 | H14N | 0.98    |
| 360 | C143 | H14O | 0.98    |
| 361 | C143 | C73  | 1.50(2) |
| 362 | C73  | H73A | 0.99    |
| 363 | C73  | H73B | 0.99    |
| 364 | C37  | H37A | 0.98    |
| 365 | C37  | H37B | 0.98    |
| 366 | C37  | H37C | 0.98    |
| 367 | C37  | C41  | 1.36(2) |
| 368 | C19  | H19A | 0.98    |
| 369 | C19  | H19B | 0.98    |
| 370 | C19  | H19C | 0.98    |
| 371 | C19  | C5   | 1.37(2) |
| 372 | C77  | H77A | 0.98    |
| 373 | C77  | H77B | 0.98    |
| 374 | C77  | H77C | 0.98    |
| 375 | C5   | H5A  | 0.99    |
| 376 | C5   | H5B  | 0.99    |
| 377 | C41  | H41A | 0.99    |
| 378 | C41  | H41B | 0.99    |

**Table S9.** Cartesian coordinates of the optimized geometry for compound **PDPP**.

| -----  |        |        |                         |          |          |  |
|--------|--------|--------|-------------------------|----------|----------|--|
| Center | Atomic | Atomic | Coordinates (Angstroms) |          |          |  |
| Number | Number | Type   | X                       | Y        | Z        |  |
| -----  |        |        |                         |          |          |  |
| 1      | 6      | 0      | -4.619835               | 4.859119 | 0.753330 |  |



|    |   |   |           |           |           |
|----|---|---|-----------|-----------|-----------|
| 2  | 6 | 0 | -3.963319 | 6.012109  | 0.622202  |
| 3  | 6 | 0 | -2.672935 | 5.670486  | 0.516857  |
| 4  | 7 | 0 | -2.568947 | 4.409035  | 0.580576  |
| 5  | 6 | 0 | -3.703780 | 3.871581  | 0.768428  |
| 6  | 6 | 0 | -2.020056 | -0.311307 | 0.998627  |
| 7  | 6 | 0 | -3.172326 | 0.326479  | 1.209049  |
| 8  | 6 | 0 | -3.013490 | 1.597096  | 0.800624  |
| 9  | 7 | 0 | -1.802363 | 1.654066  | 0.400182  |
| 10 | 6 | 0 | -1.162702 | 0.549924  | 0.421507  |
| 11 | 6 | 0 | -3.961035 | 2.553738  | 0.920554  |
| 12 | 6 | 0 | 2.837938  | 2.135627  | -0.930218 |
| 13 | 6 | 0 | 2.205086  | 0.974207  | -0.803004 |
| 14 | 6 | 0 | 1.025549  | 1.217575  | -0.202383 |
| 15 | 7 | 0 | 0.958037  | 2.481652  | -0.058312 |
| 16 | 6 | 0 | 2.027586  | 3.075561  | -0.416656 |
| 17 | 6 | 0 | 0.108407  | 0.252179  | 0.067535  |
| 18 | 6 | 0 | 0.527683  | 7.314407  | 0.124443  |
| 19 | 6 | 0 | 1.692440  | 6.691683  | -0.081602 |
| 20 | 6 | 0 | 1.453627  | 5.370299  | -0.194557 |
| 21 | 7 | 0 | 0.202527  | 5.249767  | 0.003862  |
| 22 | 6 | 0 | -0.402935 | 6.352800  | 0.178327  |
| 23 | 6 | 0 | -1.705372 | 6.585713  | 0.373993  |
| 24 | 6 | 0 | 2.350402  | 4.390991  | -0.433503 |
| 25 | 6 | 0 | 3.629664  | 4.741618  | -0.724433 |
| 26 | 6 | 0 | -5.228481 | 2.171871  | 1.217640  |
| 27 | 6 | 0 | 4.669086  | 4.118487  | -0.136172 |
| 28 | 6 | 0 | 5.954991  | 4.415899  | -0.395481 |
| 29 | 6 | 0 | 6.178030  | 5.404211  | -1.279637 |
| 30 | 6 | 0 | 5.190989  | 6.077623  | -1.899372 |
| 31 | 6 | 0 | 3.929047  | 5.716364  | -1.604243 |
| 32 | 6 | 0 | -5.955224 | 2.774191  | 2.176923  |
| 33 | 6 | 0 | -7.225040 | 2.433787  | 2.463383  |
| 34 | 6 | 0 | -7.767261 | 1.443275  | 1.731771  |
| 35 | 6 | 0 | -7.099302 | 0.796374  | 0.759041  |
| 36 | 6 | 0 | -5.827044 | 1.175117  | 0.538137  |
| 37 | 6 | 0 | 5.526435  | 7.184924  | -2.909550 |
| 38 | 6 | 0 | 6.337661  | 6.583177  | -4.078373 |
| 39 | 6 | 0 | 4.288505  | 7.881290  | -3.521967 |
| 40 | 6 | 0 | 6.357343  | 8.283227  | -2.208051 |
| 41 | 6 | 0 | 7.082024  | 3.653744  | 0.315938  |
| 42 | 6 | 0 | 6.935139  | 2.139638  | 0.038667  |
| 43 | 6 | 0 | 8.502706  | 4.060616  | -0.139190 |
| 44 | 6 | 0 | 6.994267  | 3.914696  | 1.835784  |
| 45 | 6 | 0 | -7.729233 | -0.316724 | -0.089900 |
| 46 | 6 | 0 | -7.655755 | 0.054381  | -1.589041 |
| 47 | 6 | 0 | -7.983392 | 3.161412  | 3.583197  |
| 48 | 6 | 0 | -7.260382 | 2.920866  | 4.927141  |
| 49 | 6 | 0 | -8.023802 | 4.676045  | 3.277792  |

|    |   |   |           |           |           |
|----|---|---|-----------|-----------|-----------|
| 50 | 6 | 0 | -9.447512 | 2.697309  | 3.763488  |
| 51 | 6 | 0 | 3.473043  | -7.030764 | 0.417436  |
| 52 | 6 | 0 | 2.243023  | -6.947380 | -0.102824 |
| 53 | 6 | 0 | 1.592546  | -5.774711 | -0.225607 |
| 54 | 6 | 0 | 2.249021  | -4.679688 | 0.213434  |
| 55 | 6 | 0 | 3.499620  | -4.743962 | 0.735996  |
| 56 | 6 | 0 | 4.121071  | -5.933867 | 0.841657  |
| 57 | 6 | 0 | 1.617734  | -3.495354 | 0.113403  |
| 58 | 6 | 0 | 2.235808  | -2.379792 | 0.519139  |
| 59 | 6 | 0 | 3.474309  | -2.444714 | 1.028178  |
| 60 | 6 | 0 | 4.118108  | -3.618781 | 1.145499  |
| 61 | 6 | 0 | 0.352709  | -5.662034 | -0.762593 |
| 62 | 6 | 0 | 0.381051  | -3.366076 | -0.396594 |
| 63 | 6 | 0 | -0.325264 | -6.725506 | -1.234973 |
| 64 | 6 | 0 | -1.541280 | -6.613342 | -1.779747 |
| 65 | 6 | 0 | -2.141144 | -5.416770 | -1.871485 |
| 66 | 6 | 0 | -1.494807 | -4.333365 | -1.401163 |
| 67 | 6 | 0 | -0.260775 | -4.459131 | -0.856717 |
| 68 | 6 | 0 | -2.053345 | -3.113140 | -1.499299 |
| 69 | 6 | 0 | -1.354209 | -2.044196 | -1.078427 |
| 70 | 6 | 0 | -0.166084 | -2.132327 | -0.454411 |
| 71 | 6 | 0 | 5.375412  | -6.056776 | 1.360635  |
| 72 | 6 | 0 | 5.374884  | -3.636876 | 1.673270  |
| 73 | 6 | 0 | -3.377944 | -5.336797 | -2.434645 |
| 74 | 6 | 0 | -3.299355 | -2.933923 | -2.026271 |
| 75 | 7 | 0 | 5.984643  | -4.878478 | 1.774238  |
| 76 | 7 | 0 | -3.975746 | -4.088739 | -2.399178 |
| 77 | 6 | 0 | 7.350688  | -4.946684 | 2.350034  |
| 78 | 6 | 0 | 8.422571  | -4.240544 | 1.489776  |
| 79 | 6 | 0 | 7.416624  | -4.537775 | 3.838826  |
| 80 | 6 | 0 | 6.398927  | -5.302781 | 4.697051  |
| 81 | 6 | 0 | -5.397870 | -3.978165 | -2.800830 |
| 82 | 6 | 0 | -5.601796 | -4.027767 | -4.329233 |
| 83 | 6 | 0 | -4.821173 | -2.937207 | -5.075127 |
| 84 | 8 | 0 | 5.939291  | -2.628673 | 2.039439  |
| 85 | 8 | 0 | 5.930167  | -7.131801 | 1.455585  |
| 86 | 8 | 0 | -3.942952 | -6.294097 | -2.917483 |
| 87 | 7 | 0 | 1.687394  | -1.245718 | 0.447397  |
| 88 | 6 | 0 | 0.509129  | -1.053330 | 0.020294  |
| 89 | 6 | 0 | -6.356341 | -4.948083 | -2.063582 |
| 90 | 8 | 0 | -3.810938 | -1.839290 | -2.140953 |
| 91 | 6 | 0 | -6.023375 | -5.139722 | -0.576037 |
| 92 | 6 | 0 | -6.954445 | -1.628844 | 0.147860  |
| 93 | 6 | 0 | -9.215673 | -0.597155 | 0.232400  |
| 94 | 6 | 0 | 8.397372  | -4.711376 | 0.028610  |
| 95 | 1 | 0 | -5.712152 | 4.804780  | 0.834055  |
| 96 | 1 | 0 | -4.405366 | 7.016365  | 0.594460  |
| 97 | 1 | 0 | -1.855311 | -1.355095 | 1.295535  |

|     |   |   |            |           |           |
|-----|---|---|------------|-----------|-----------|
| 98  | 1 | 0 | -4.039852  | -0.145048 | 1.688600  |
| 99  | 1 | 0 | -1.370360  | 2.535454  | 0.041631  |
| 100 | 1 | 0 | 3.817122   | 2.230546  | -1.416315 |
| 101 | 1 | 0 | 2.635268   | 0.039772  | -1.185364 |
| 102 | 1 | 0 | 0.382329   | 8.395929  | 0.243759  |
| 103 | 1 | 0 | 2.646657   | 7.230366  | -0.135349 |
| 104 | 1 | 0 | -0.297315  | 4.333035  | -0.006517 |
| 105 | 1 | 0 | -2.012057  | 7.647055  | 0.418030  |
| 106 | 1 | 0 | 4.464039   | 3.352152  | 0.628555  |
| 107 | 1 | 0 | 7.211831   | 5.683581  | -1.518275 |
| 108 | 1 | 0 | 3.101412   | 6.197712  | -2.144140 |
| 109 | 1 | 0 | -5.476429  | 3.552888  | 2.791362  |
| 110 | 1 | 0 | -8.802014  | 1.150292  | 1.937932  |
| 111 | 1 | 0 | -5.275671  | 0.684605  | -0.279950 |
| 112 | 1 | 0 | 6.573550   | 7.353322  | -4.847262 |
| 113 | 1 | 0 | 7.311603   | 6.156190  | -3.752815 |
| 114 | 1 | 0 | 5.766138   | 5.769741  | -4.580927 |
| 115 | 1 | 0 | 4.586681   | 8.686988  | -4.230525 |
| 116 | 1 | 0 | 3.657809   | 8.367702  | -2.743500 |
| 117 | 1 | 0 | 3.658520   | 7.174835  | -4.108500 |
| 118 | 1 | 0 | 7.335456   | 7.912973  | -1.830252 |
| 119 | 1 | 0 | 6.590098   | 9.122202  | -2.902105 |
| 120 | 1 | 0 | 5.801371   | 8.708016  | -1.341166 |
| 121 | 1 | 0 | 7.762036   | 1.558888  | 0.506472  |
| 122 | 1 | 0 | 5.991399   | 1.711596  | 0.442024  |
| 123 | 1 | 0 | 6.955974   | 1.932650  | -1.055770 |
| 124 | 1 | 0 | 9.282650   | 3.468142  | 0.390628  |
| 125 | 1 | 0 | 8.723616   | 5.128899  | 0.084242  |
| 126 | 1 | 0 | 8.656929   | 3.879804  | -1.227250 |
| 127 | 1 | 0 | 6.041700   | 3.551336  | 2.280391  |
| 128 | 1 | 0 | 7.814857   | 3.398541  | 2.383626  |
| 129 | 1 | 0 | 7.073912   | 5.003441  | 2.057239  |
| 130 | 1 | 0 | -8.145542  | -0.718816 | -2.223414 |
| 131 | 1 | 0 | -8.168661  | 1.023871  | -1.783212 |
| 132 | 1 | 0 | -6.613727  | 0.141614  | -1.967181 |
| 133 | 1 | 0 | -7.797396  | 3.411447  | 5.770398  |
| 134 | 1 | 0 | -7.198035  | 1.832333  | 5.155455  |
| 135 | 1 | 0 | -6.224261  | 3.324862  | 4.937920  |
| 136 | 1 | 0 | -8.602875  | 5.230833  | 4.050375  |
| 137 | 1 | 0 | -8.505801  | 4.869603  | 2.292343  |
| 138 | 1 | 0 | -7.014323  | 5.141745  | 3.254451  |
| 139 | 1 | 0 | -10.053382 | 2.867312  | 2.844596  |
| 140 | 1 | 0 | -9.513573  | 1.622398  | 4.046438  |
| 141 | 1 | 0 | -9.953575  | 3.261781  | 4.579241  |
| 142 | 1 | 0 | 3.918482   | -8.038676 | 0.472804  |
| 143 | 1 | 0 | 1.824132   | -7.914266 | -0.415712 |
| 144 | 1 | 0 | 3.935835   | -1.494678 | 1.347902  |
| 145 | 1 | 0 | 0.060895   | -7.754415 | -1.219211 |

|     |   |   |           |           |           |
|-----|---|---|-----------|-----------|-----------|
| 146 | 1 | 0 | -2.014813 | -7.541825 | -2.141549 |
| 147 | 1 | 0 | -1.769676 | -1.045047 | -1.263840 |
| 148 | 1 | 0 | 7.716093  | -6.002805 | 2.373643  |
| 149 | 1 | 0 | 8.311827  | -3.133531 | 1.518663  |
| 150 | 1 | 0 | 9.434395  | -4.450181 | 1.914307  |
| 151 | 1 | 0 | 8.441199  | -4.743236 | 4.233732  |
| 152 | 1 | 0 | 7.259708  | -3.444285 | 3.973899  |
| 153 | 1 | 0 | 5.353362  | -5.067684 | 4.393858  |
| 154 | 1 | 0 | 6.543226  | -6.403719 | 4.607686  |
| 155 | 1 | 0 | 6.501706  | -5.033904 | 5.773515  |
| 156 | 1 | 0 | -5.801939 | -2.985521 | -2.479743 |
| 157 | 1 | 0 | -5.305098 | -5.023814 | -4.731240 |
| 158 | 1 | 0 | -6.688019 | -3.905805 | -4.559050 |
| 159 | 1 | 0 | -5.018617 | -2.984719 | -6.170851 |
| 160 | 1 | 0 | -5.114093 | -1.921026 | -4.725310 |
| 161 | 1 | 0 | -3.723058 | -3.052157 | -4.930717 |
| 162 | 1 | 0 | -7.400420 | -4.557121 | -2.146092 |
| 163 | 1 | 0 | -6.392229 | -5.945235 | -2.558090 |
| 164 | 1 | 0 | -6.848009 | -5.671512 | -0.047986 |
| 165 | 1 | 0 | -5.102490 | -5.746891 | -0.430464 |
| 166 | 1 | 0 | -5.859299 | -4.168573 | -0.060916 |
| 167 | 1 | 0 | -7.411052 | -2.459815 | -0.434943 |
| 168 | 1 | 0 | -6.973155 | -1.918082 | 1.223230  |
| 169 | 1 | 0 | -5.888363 | -1.562106 | -0.162748 |
| 170 | 1 | 0 | -9.853762 | 0.298904  | 0.058200  |
| 171 | 1 | 0 | -9.626443 | -1.403585 | -0.416606 |
| 172 | 1 | 0 | -9.358175 | -0.945213 | 1.280488  |
| 173 | 1 | 0 | 9.213603  | -4.232169 | -0.559695 |
| 174 | 1 | 0 | 8.532586  | -5.814853 | -0.041338 |
| 175 | 1 | 0 | 7.434035  | -4.451194 | -0.465717 |

**Table S10.** Cartesian coordinates of the optimized geometry for compound **Zn-PDPP**.

| Center Number | Atomic Number | Atomic Type | Coordinates (Angstroms) |           |           |
|---------------|---------------|-------------|-------------------------|-----------|-----------|
|               |               |             | X                       | Y         | Z         |
| 1             | 6             | 0           | 6.328993                | -2.374143 | -1.682558 |
| 2             | 6             | 0           | 7.121322                | -1.263465 | -1.702027 |
| 3             | 6             | 0           | 6.259742                | -0.128713 | -1.466111 |
| 4             | 7             | 0           | 4.963423                | -0.553481 | -1.308843 |
| 5             | 6             | 0           | 4.973265                | -1.922671 | -1.440030 |
| 6             | 6             | 0           | 0.297820                | -2.380540 | -0.763859 |
| 7             | 6             | 0           | 1.372743                | -3.176441 | -1.027500 |
| 8             | 6             | 0           | 2.534413                | -2.315996 | -1.088785 |
| 9             | 7             | 0           | 2.149063                | -1.011612 | -0.869982 |
| 10            | 6             | 0           | 0.789612                | -1.023564 | -0.665214 |
| 11            | 6             | 0           | 3.845804                | -2.760744 | -1.345360 |
| 12            | 6             | 0           | 0.390600                | 3.680845  | -0.085532 |
| 13            | 6             | 0           | -0.410538               | 2.578315  | -0.066475 |
| 14            | 6             | 0           | 0.433051                | 1.437047  | -0.347147 |

|    |   |   |           |           |           |
|----|---|---|-----------|-----------|-----------|
| 15 | 7 | 0 | 1.728732  | 1.857746  | -0.532327 |
| 16 | 6 | 0 | 1.732524  | 3.227220  | -0.382413 |
| 17 | 6 | 0 | -0.009102 | 0.104521  | -0.408036 |
| 18 | 6 | 0 | 6.397146  | 3.685646  | -1.133441 |
| 19 | 6 | 0 | 5.325953  | 4.491655  | -0.878866 |
| 20 | 6 | 0 | 4.168275  | 3.629225  | -0.749752 |
| 21 | 7 | 0 | 4.550260  | 2.320774  | -0.933817 |
| 22 | 6 | 0 | 5.903248  | 2.328958  | -1.167831 |
| 23 | 6 | 0 | 6.688331  | 1.199114  | -1.406286 |
| 24 | 6 | 0 | 2.856655  | 4.069163  | -0.486537 |
| 25 | 6 | 0 | 2.642413  | 5.544495  | -0.301922 |
| 26 | 6 | 0 | 4.056967  | -4.236140 | -1.531624 |
| 27 | 6 | 0 | 2.098189  | 6.313967  | -1.331369 |
| 28 | 6 | 0 | 1.893449  | 7.697548  | -1.181895 |
| 29 | 6 | 0 | 2.249838  | 8.276545  | 0.040826  |
| 30 | 6 | 0 | 2.798330  | 7.533673  | 1.104562  |
| 31 | 6 | 0 | 2.990205  | 6.162208  | 0.910828  |
| 32 | 6 | 0 | 4.234478  | -4.770547 | -2.812929 |
| 33 | 6 | 0 | 4.430225  | -6.145413 | -3.010123 |
| 34 | 6 | 0 | 4.448572  | -6.972652 | -1.875682 |
| 35 | 6 | 0 | 4.277158  | -6.473498 | -0.574491 |
| 36 | 6 | 0 | 4.078572  | -5.093069 | -0.425194 |
| 37 | 6 | 0 | 3.159562  | 8.245118  | 2.424114  |
| 38 | 6 | 0 | 1.889480  | 8.895322  | 3.025760  |
| 39 | 6 | 0 | 3.742238  | 7.277421  | 3.472921  |
| 40 | 6 | 0 | 4.214362  | 9.344652  | 2.148130  |
| 41 | 6 | 0 | 1.297490  | 8.509273  | -2.349625 |
| 42 | 6 | 0 | -0.102749 | 7.951344  | -2.704235 |
| 43 | 6 | 0 | 1.143761  | 10.005306 | -2.012305 |
| 44 | 6 | 0 | 2.222758  | 8.389044  | -3.585484 |
| 45 | 6 | 0 | 4.302653  | -7.378878 | 0.674031  |
| 46 | 6 | 0 | 5.447665  | -6.927789 | 1.613988  |
| 47 | 6 | 0 | 4.610787  | -6.691816 | -4.441192 |
| 48 | 6 | 0 | 3.352097  | -6.362074 | -5.280835 |
| 49 | 6 | 0 | 5.848045  | -6.028969 | -5.095079 |
| 50 | 6 | 0 | 4.817065  | -8.219058 | -4.470519 |
| 51 | 6 | 0 | -8.368858 | -1.194941 | 0.393277  |
| 52 | 6 | 0 | -7.576065 | -1.389623 | 1.524476  |
| 53 | 6 | 0 | -6.185269 | -1.194438 | 1.489079  |
| 54 | 6 | 0 | -5.601964 | -0.788640 | 0.252380  |
| 55 | 6 | 0 | -6.413236 | -0.589986 | -0.897603 |
| 56 | 6 | 0 | -7.799987 | -0.796376 | -0.817671 |
| 57 | 6 | 0 | -4.198186 | -0.572547 | 0.138963  |
| 58 | 6 | 0 | -3.616865 | -0.168577 | -1.085847 |
| 59 | 6 | 0 | -4.458691 | 0.024731  | -2.222875 |
| 60 | 6 | 0 | -5.814584 | -0.180244 | -2.131407 |
| 61 | 6 | 0 | -5.311101 | -1.384619 | 2.653746  |
| 62 | 6 | 0 | -3.351644 | -0.757491 | 1.258877  |
| 63 | 6 | 0 | -5.783517 | -1.779581 | 3.916641  |
| 64 | 6 | 0 | -4.920044 | -1.946738 | 4.999144  |

|     |   |   |           |           |           |
|-----|---|---|-----------|-----------|-----------|
| 65  | 6 | 0 | -3.548983 | -1.724998 | 4.861163  |
| 66  | 6 | 0 | -3.033578 | -1.329860 | 3.616033  |
| 67  | 6 | 0 | -3.908777 | -1.158991 | 2.509523  |
| 68  | 6 | 0 | -1.631293 | -1.096303 | 3.458782  |
| 69  | 6 | 0 | -1.112486 | -0.710480 | 2.245317  |
| 70  | 6 | 0 | -1.960790 | -0.536003 | 1.111365  |
| 71  | 6 | 0 | -8.667386 | -0.595891 | -2.006178 |
| 72  | 6 | 0 | -6.666804 | 0.028543  | -3.336517 |
| 73  | 6 | 0 | -2.651999 | -1.907974 | 6.030598  |
| 74  | 6 | 0 | -0.713300 | -1.269107 | 4.617913  |
| 75  | 7 | 0 | -8.046594 | -0.192717 | -3.206119 |
| 76  | 7 | 0 | -1.282335 | -1.668687 | 5.845583  |
| 77  | 6 | 0 | -8.933064 | 0.005547  | -4.400524 |
| 78  | 6 | 0 | -8.953968 | 1.469909  | -4.878172 |
| 79  | 6 | 0 | -8.618295 | -0.987777 | -5.535042 |
| 80  | 6 | 0 | -8.656887 | -2.461291 | -5.114327 |
| 81  | 6 | 0 | -0.347595 | -1.840698 | 7.006602  |
| 82  | 6 | 0 | -0.633190 | -0.839768 | 8.142120  |
| 83  | 6 | 0 | -0.632330 | 0.629474  | 7.704882  |
| 84  | 8 | 0 | -6.181974 | 0.380820  | -4.405051 |
| 85  | 8 | 0 | -9.878588 | -0.775466 | -1.942093 |
| 86  | 8 | 0 | -3.094007 | -2.255688 | 7.120858  |
| 87  | 7 | 0 | -2.274716 | 0.040832  | -1.223603 |
| 88  | 6 | 0 | -1.477408 | -0.136294 | -0.184926 |
| 89  | 6 | 0 | -0.286106 | -3.299400 | 7.497737  |
| 90  | 8 | 0 | 0.490806  | -1.072347 | 4.508663  |
| 91  | 6 | 0 | 0.070213  | -4.318459 | 6.409427  |
| 92  | 6 | 0 | 2.952394  | -7.263402 | 1.423134  |
| 93  | 6 | 0 | 4.528809  | -8.863108 | 0.324969  |
| 94  | 6 | 0 | -9.333600 | 2.483863  | -3.793043 |
| 95  | 1 | 0 | 6.626146  | -3.404204 | -1.814598 |
| 96  | 1 | 0 | 8.191427  | -1.210605 | -1.855837 |
| 97  | 1 | 0 | -0.734365 | -2.685332 | -0.664269 |
| 98  | 1 | 0 | 1.382522  | -4.246075 | -1.176812 |
| 99  | 1 | 0 | 0.105250  | 4.708356  | 0.085584  |
| 100 | 1 | 0 | -1.475458 | 2.543946  | 0.113213  |
| 101 | 1 | 0 | 7.427890  | 3.976445  | -1.290235 |
| 102 | 1 | 0 | 5.311094  | 5.568080  | -0.789737 |
| 103 | 1 | 0 | 7.749117  | 1.371936  | -1.562934 |
| 104 | 1 | 0 | 1.838099  | 5.819564  | -2.262313 |
| 105 | 1 | 0 | 2.099587  | 9.339990  | 0.180620  |
| 106 | 1 | 0 | 3.407426  | 5.544171  | 1.697053  |
| 107 | 1 | 0 | 4.210729  | -4.092655 | -3.660667 |
| 108 | 1 | 0 | 4.600318  | -8.034369 | -2.009067 |
| 109 | 1 | 0 | 3.942777  | -4.661696 | 0.561842  |
| 110 | 1 | 0 | 2.132699  | 9.404903  | 3.965427  |
| 111 | 1 | 0 | 1.450025  | 9.635310  | 2.349936  |
| 112 | 1 | 0 | 1.125877  | 8.138845  | 3.236895  |
| 113 | 1 | 0 | 3.981122  | 7.830053  | 4.387817  |
| 114 | 1 | 0 | 4.665754  | 6.803220  | 3.123922  |

|     |   |   |           |           |           |
|-----|---|---|-----------|-----------|-----------|
| 115 | 1 | 0 | 3.031575  | 6.488318  | 3.740746  |
| 116 | 1 | 0 | 3.845671  | 10.097234 | 1.444505  |
| 117 | 1 | 0 | 4.478230  | 9.859665  | 3.079218  |
| 118 | 1 | 0 | 5.129087  | 8.912504  | 1.727971  |
| 119 | 1 | 0 | -0.536534 | 8.515969  | -3.537755 |
| 120 | 1 | 0 | -0.059962 | 6.899364  | -3.001728 |
| 121 | 1 | 0 | -0.783393 | 8.031002  | -1.849496 |
| 122 | 1 | 0 | 0.718181  | 10.531962 | -2.873078 |
| 123 | 1 | 0 | 2.106712  | 10.474536 | -1.783223 |
| 124 | 1 | 0 | 0.471019  | 10.166623 | -1.162987 |
| 125 | 1 | 0 | 2.336648  | 7.350590  | -3.910469 |
| 126 | 1 | 0 | 1.809086  | 8.958298  | -4.426075 |
| 127 | 1 | 0 | 3.221208  | 8.782957  | -3.366368 |
| 128 | 1 | 0 | 5.476265  | -7.560847 | 2.508577  |
| 129 | 1 | 0 | 6.418440  | -7.003915 | 1.112134  |
| 130 | 1 | 0 | 5.321292  | -5.891919 | 1.942556  |
| 131 | 1 | 0 | 3.467236  | -6.741347 | -6.302961 |
| 132 | 1 | 0 | 2.459362  | -6.823904 | -4.845217 |
| 133 | 1 | 0 | 3.174316  | -5.284349 | -5.343175 |
| 134 | 1 | 0 | 5.984894  | -6.404341 | -6.115958 |
| 135 | 1 | 0 | 6.757563  | -6.252027 | -4.526506 |
| 136 | 1 | 0 | 5.746271  | -4.941063 | -5.151354 |
| 137 | 1 | 0 | 5.713930  | -8.522102 | -3.919420 |
| 138 | 1 | 0 | 3.958650  | -8.756525 | -4.053300 |
| 139 | 1 | 0 | 4.940268  | -8.550994 | -5.506922 |
| 140 | 1 | 0 | -9.441422 | -1.349552 | 0.435306  |
| 141 | 1 | 0 | -8.061155 | -1.698400 | 2.443130  |
| 142 | 1 | 0 | -4.014070 | 0.334542  | -3.162091 |
| 143 | 1 | 0 | -6.840534 | -1.962026 | 4.070977  |
| 144 | 1 | 0 | -5.299511 | -2.251547 | 5.968443  |
| 145 | 1 | 0 | -0.045330 | -0.540606 | 2.162285  |
| 146 | 1 | 0 | -9.924303 | -0.233612 | -4.012453 |
| 147 | 1 | 0 | -7.989035 | 1.730926  | -5.320867 |
| 148 | 1 | 0 | -9.695917 | 1.513957  | -5.685890 |
| 149 | 1 | 0 | -9.378584 | -0.815060 | -6.307676 |
| 150 | 1 | 0 | -7.651089 | -0.746303 | -5.983787 |
| 151 | 1 | 0 | -7.872913 | -2.694922 | -4.385608 |
| 152 | 1 | 0 | -9.620288 | -2.726803 | -4.664597 |
| 153 | 1 | 0 | -8.498796 | -3.112075 | -5.980544 |
| 154 | 1 | 0 | 0.624035  | -1.591020 | 6.577796  |
| 155 | 1 | 0 | -1.578805 | -1.090248 | 8.630396  |
| 156 | 1 | 0 | 0.158691  | -0.993055 | 8.886593  |
| 157 | 1 | 0 | -0.766868 | 1.287447  | 8.569680  |
| 158 | 1 | 0 | 0.309130  | 0.903695  | 7.215837  |
| 159 | 1 | 0 | -1.446497 | 0.843915  | 7.003900  |
| 160 | 1 | 0 | 0.485167  | -3.323657 | 8.278345  |
| 161 | 1 | 0 | -1.230205 | -3.570704 | 7.977774  |
| 162 | 1 | 0 | 0.167579  | -5.320867 | 6.839141  |
| 163 | 1 | 0 | -0.702786 | -4.370761 | 5.634848  |
| 164 | 1 | 0 | 1.017379  | -4.068588 | 5.918354  |

|     |    |   |            |           |           |
|-----|----|---|------------|-----------|-----------|
| 165 | 1  | 0 | 2.958427   | -7.898236 | 2.316892  |
| 166 | 1  | 0 | 2.122236   | -7.584289 | 0.784260  |
| 167 | 1  | 0 | 2.750716   | -6.237391 | 1.744992  |
| 168 | 1  | 0 | 5.488113   | -9.024083 | -0.178693 |
| 169 | 1  | 0 | 4.536985   | -9.457306 | 1.244949  |
| 170 | 1  | 0 | 3.733181   | -9.259399 | -0.315220 |
| 171 | 1  | 0 | -9.400851  | 3.491580  | -4.215954 |
| 172 | 1  | 0 | -10.301267 | 2.243928  | -3.338160 |
| 173 | 1  | 0 | -8.587505  | 2.517438  | -2.991508 |
| 174 | 30 | 0 | 3.346837   | 0.655318  | -0.907504 |

## References:

1. M. J. Frisch, G. W. Trucks, H. B. Schlegel, G. E. Scuseria, M. A. Robb, J. R. Cheeseman, G. Scalmani, V. Barone, B. Mennucci, G. A. Petersson, H. Nakatsuji, M. Caricato, X. Li, H. P. Hratchian, A. F. Izmaylov, J. Bloino, G. Zheng, J. L. Sonnenberg, M. Hada, M. Ehara, K. Toyota, R. Fukuda, J. Hasegawa, M. Ishida, T. Nakajima, Y. Honda, O. Kitao, H. Nakai, T. Vreven, J. A. Montgomery, Jr., J. E. Peralta, F. Ogliaro, M. Bearpark, J. J. Heyd, E. Brothers, K. N. Kudin, V. N. Staroverov, T. Keith, R. Kobayashi, J. Normand, K. Raghavachari, A. Rendell, J. C. Burant, S. S. Iyengar, J. Tomasi, M. Cossi, N. Rega, J. M. Millam, M. Klene, J. E. Knox, J. B. Cross, V. Bakken, C. Adamo, J. Jaramillo, R. Gomperts, R. E. Stratmann, O. Yazyev, A. J. Austin, R. Cammi, C. Pomelli, J. W. Ochterski, R. L. Martin, K. Morokuma, V. G. Zakrzewski, G. A. Voth, P. Salvador, J. J. Dannenberg, S. Dapprich, A. D. Daniels, O. Farkas, J. B. Foresman, J. V. Ortiz, J. Cioslowski, D. J. Fox, Gaussian 09, Revision D.01, *Gaussian, Inc.*, Wallingford CT, 2013.
2. F. Zhao, C. Wang, X. Zhan, Morphology control in organic solar cells, *Adv. Energy Mater.* 2018, **8**, 1703147.
